# Supplementary material for: The Dual Cell Cycle Kinase Inhibitor JNJ-7706621 Reverses Resistance to CD37-Targeted Radioimmunotherapy in Activated B Cell Like Diffuse Large B Cell Lymphoma Cell Lines
Source: Front Oncol. 2019 Nov 29;9:1301. doi: 10.3389/fonc.2019.01301 (PMC6897291; doi:10.3389/fonc.2019.01301)
Supplement: Supplementary file 2 [file Table_2.XLSX]

## Sheet: Plate layout
RIVA	Plate layout 1 (P1)
	1	2	3	4	5	6	7	8	9	10	11	12	13	14	15	16	17	18	19	20	21	22	23	24
A	X	X	X	X	X	X	X	X	X	X	X	X	X	X	X	X	X	X	X	X	X	X	X	X
B	X	X	X	X	X	X	X	X	X	X	X	X	X	X	X	X	X	X	X	X	X	X	X	X
C	X	X	No drug	No drug	No drug	No drug	No drug	No drug	No drug	No drug	No drug	No drug	No drug	No drug	No drug	No drug	No drug	No drug	No drug	No drug	No drug	No drug	X	X
D	X	X	Sell 1	Sell 2	Sell 3	Sell 4	Sell 5	Sell 6	Sell 7	Sell 8	Sell 9	No drug	Sell 10	Sell 11	Sell 12	Sell 13	Sell 14	Sell 15	Sell 16	Sell 17	Sell 18	Sell 19	X	X
E	X	X	Sell 20	Sell 21	Sell 22	Sell 23	Sell 24	Sell 25	Sell 26	Sell 27	Sell 28	Sell 29	Sell 30	Sell 31	Sell 32	Sell 33	Sell 34	Sell 35	Sell 36	Sell 37	Sell 38	Sell 39	X	X
F	X	X	Sell 40	Sell 41	No drug	Sell 42	Sell 43	Sell 44	Sell 45	Sell 46	Sell 47	Sell 48	Sell 49	Sell 50	Sell 51	Sell 52	Sell 53	Sell 54	Sell 55	Sell 56	Sell 57	Sell 58	X	X
G	X	X	Sell 59	Sell 60	Sell 61	Sell 62	No drug	Sell 63	Sell 64	Sell 65	Sell 66	Sell 67	Sell 68	Sell 69	Sell 70	Sell 71	No drug	Sell 72	Sell 73	Sell 74	No drug	Sell 75	X	X
H	X	X	No drug	Sell 76	Sell 77	Sell 78	Sell 79	Sell 80	Sell 81	Sell 82	Sell 83	Sell 84	Sell 85	Sell 86	Sell 87	Sell 88	Sell 89	Sell 90	Sell 91	Sell 92	Sell 93	Sell 94	X	X
I	X	X	Sell 95	Sell 96	Sell 97	Sell 98	Sell 99	Sell 100	Sell 101	Sell 102	Sell 103	Sell 104	Sell 105	Sell 106	Sell 107	Sell 108	Sell 109	Sell 110	Sell 111	Sell 112	Sell 113	Sell 114	X	X
J	X	X	Sell 115	Sell 116	Sell 117	Sell 118	Sell 119	Sell 120	Sell 121	Sell 122	Sell 123	Sell 124	Sell 125	No drug	Sell 126	Sell 127	Sell 128	Sell 129	Sell 130	Sell 131	Sell 132	Sell 133	X	X
K	X	X	Sell 134	Sell 135	Sell 136	Sell 137	Sell 138	Sell 139	Sell 140	No drug	Sell 141	Sell 142	Sell 143	Sell 144	Sell 145	Sell 146	Sell 147	Sell 148	Sell 149	Sell 150	Sell 151	Sell 152	X	X
L	X	X	Sell 153	Sell 154	Sell 155	Sell 156	Sell 157	Sell 158	Sell 159	Sell 160	Sell 161	Sell 162	Sell 163	Sell 164	Sell 165	Sell 166	Sell 167	Sell 168	Sell 169	Sell 170	Sell 171	Sell 172	X	X
M	X	X	Sell 173	Sell 174	Sell 175	Sell 176	Sell 177	Sell 178	Sell 179	Sell 180	Sell 181	Sell 182	Sell 183	Sell 184	Sell 185	Sell 186	Sell 187	Sell 188	Sell 189	Sell 190	Sell 191	Sell 192	X	X
N	X	X	No drug	No drug	No drug	No drug	No drug	No drug	No drug	No drug	No drug	No drug	No drug	No drug	No drug	No drug	No drug	No drug	No drug	No drug	No drug	No drug	X	X
O	X	X	X	X	X	X	X	X	X	X	X	X	X	X	X	X	X	X	X	X	X	X	X	X
P	X	X	X	X	X	X	X	X	X	X	X	X	X	X	X	X	X	X	X	X	X	X	X	X
	Plate layout 2 (P2)
	1	2	3	4	5	6	7	8	9	10	11	12	13	14	15	16	17	18	19	20	21	22	23	24
A	X	X	X	X	X	X	X	X	X	X	X	X	X	X	X	X	X	X	X	X	X	X	X	X
B	X	X	X	X	X	X	X	X	X	X	X	X	X	X	X	X	X	X	X	X	X	X	X	X
C	X	X	No drug	No drug	No drug	No drug	No drug	No drug	No drug	No drug	No drug	No drug	No drug	No drug	No drug	No drug	No drug	No drug	No drug	No drug	No drug	No drug	X	X
D	X	X	Sell 193	Sell 194	Sell 195	Sell 196	Sell 197	Sell 198	Sell 199	Sell 200	Sell 201	No drug	Sell 202	Sell 203	Sell 204	Sell 205	Sell 206	Sell 207	Sell 208	Sell 209	Sell 210	Sell 211	X	X
E	X	X	Sell 212	No drug	Sell 213	Sell 214	Sell 215	Sell 216	Sell 217	Sell 218	Sell 219	Sell 220	Sell 221	Sell 222	Sell 223	Sell 224	Sell 225	Sell 226	Sell 227	Sell 228	Sell 229	Sell 230	X	X
F	X	X	Sell 231	Sell 232	Sell 233	Sell 234	Sell 235	Sell 236	Sell 237	Sell 238	Sell 239	Sell 240	Sell 241	Sell 242	Sell 243	Sell 244	Sell 245	Sell 246	Sell 247	Sell 248	Sell 249	Sell 250	X	X
G	X	X	Sell 251	Sell 252	Sell 253	Sell 254	Sell 255	Sell 256	Sell 257	Sell 258	Sell 259	Sell 260	Sell 261	Sell 262	Sell 263	Sell 264	Sell 265	Sell 266	Sell 267	Sell 268	Sell 269	Sell 270	X	X
H	X	X	Sell 271	Sell 272	Sell 273	Sell 274	Sell 275	Sell 276	Sell 277	Sell 278	Sell 279	No drug	Sell 280	Sell 281	Sell 282	Sell 283	Sell 284	Sell 285	Sell 286	Sell 287	Sell 288	Sell 289	X	X
I	X	X	Sell 290	Sell 291	Sell 292	Sell 293	No drug	Sell 294	Sell 295	Sell 296	Sell 297	Sell 298	Sell 299	Sell 300	Sell 301	Sell 302	Sell 303	No drug	Sell 304	Sell 305	Sell 306	No drug	X	X
J	X	X	Sell 307	Sell 308	Sell 309	Sell 310	Sell 311	Sell 312	Sell 313	Sell 314	Sell 315	Sell 316	Sell 317	Sell 318	Sell 319	Sell 320	Sell 321	Sell 322	Sell 323	Sell 324	Sell 325	Sell 326	X	X
K	X	X	Sell 327	Sell 328	Sell 329	Sell 330	Sell 331	Sell 332	Sell 333	Sell 334	Sell 335	Sell 336	Sell 337	Sell 338	Sell 339	Sell 340	Sell 341	Sell 342	Sell 343	Sell 344	Sell 345	Sell 346	X	X
L	X	X	Sell 347	No drug	Sell 348	Sell 349	Sell 350	Sell 351	Sell 352	Sell 353	Sell 354	Sell 355	Sell 356	Sell 357	Sell 358	Sell 359	Sell 360	Sell 361	Sell 362	Sell 363	Sell 364	Sell 365	X	X
M	X	X	Sell 366	Sell 367	Sell 368	Sell 369	Sell 370	Sell 371	Sell 372	Sell 373	Sell 374	Sell 375	Sell 376	Sell 377	No drug	Sell 378	Sell 379	Sell 380	Sell 381	Sell 382	Sell 383	Sell 384	X	X
N	X	X	No drug	No drug	No drug	No drug	No drug	No drug	No drug	No drug	No drug	No drug	No drug	No drug	No drug	No drug	No drug	No drug	No drug	No drug	No drug	No drug	X	X
O	X	X	X	X	X	X	X	X	X	X	X	X	X	X	X	X	X	X	X	X	X	X	X	X
P	X	X	X	X	X	X	X	X	X	X	X	X	X	X	X	X	X	X	X	X	X	X	X	X

## Sheet: P1_10nM
P1_10nM		RAW DATA (RLU)
											Effect of drug alone (Fa) =1-(〖RLU〗_drug/〖averageRLU〗_control )						Expected value if additive effect (E) =Fa+F̅b-Fa*F̅b							Measured effect (M) =1-(〖RLU〗_combination/〖averageRLU〗_control )					Measured effect- Expected additive value (M-E)					Bliss score = (M-E)/(1-Fa)
		Minus_177Lu-lilotomab satetraxetan				Plus_177Lu-lilotomab satetraxetan											(Bliss Independence)
		Dy3	Dy4	Dy5	Dy6	Dy3	Dy4	Dy5	Dy6		Dy3	Dy4	Dy5	Dy6			Dy3	Dy4	Dy5	Dy6				Dy3	Dy4	Dy5	Dy6		Dy3	Dy4	Dy5	Dy6		Dy3	Dy4	Dy5	Dy6
ABT0737	Sell 1	8672	20505	23769	26608	5140	8073	7441	7449		0.932726	0.887768	0.88196	0.879694			0.970105	0.955369	0.955598	0.955716				0.960126	0.955813	0.963047	0.96632		-0.00997873	0.000444458	0.00744884	0.0106035		-0.14833	0.00396016	0.0631046	0.0881374
Altretamine (Hexalen)	Sell 2	161150	229580	259670	291560	83910	97090	104490	113820		-0.250138	-0.256587	-0.28955	-0.31827			0.444461	0.500294	0.514924	0.514757				0.34906	0.468586	0.481091	0.48537		-0.0954013	-0.0317083	-0.0338325	-0.0293868		-0.0763127	-0.0252337	-0.0262359	-0.0222919
Azacitidine (Vidaza)	Sell 3	166770	235000	273440	317980	76488	94493	99548	110500		-0.293736	-0.286253	-0.357934	-0.437727			0.425087	0.488497	0.4892	0.470786				0.406636	0.4828	0.505634	0.500381		-0.0184503	-0.00569664	0.0164331	0.0295952		-0.0142613	-0.00442886	0.0121015	0.0205847
Capecitabine (Xeloda)	Sell 4	173410	241370	272610	300860	68573	85308	90825	99705		-0.345246	-0.321118	-0.353812	-0.36032			0.402196	0.474632	0.490751	0.499279				0.468038	0.533074	0.548953	0.54919		0.0658414	0.0584417	0.058202	0.0499113		0.0489438	0.0442365	0.0429912	0.0366909
Chrysophanic acid (Chrysophanol)	Sell 5	163140	231780	262750	292410	74060	95070	98445	108090		-0.265575	-0.268628	-0.304846	-0.322114			0.437601	0.495506	0.50917	0.513342				0.425472	0.479642	0.511111	0.511278		-0.0121287	-0.0158635	0.00194124	-0.0020643		-0.00958357	-0.0125044	0.00148772	-0.00156136
Dacomitinib (PF299804, PF-00299804)	Sell 6	167490	244670	277120	311660	71434	86864	90543	102180		-0.299321	-0.339181	-0.376209	-0.409151			0.422605	0.467449	0.482326	0.481304				0.445843	0.524557	0.550353	0.537999		0.0232387	0.0571079	0.0680273	0.0566952		0.0178852	0.0426439	0.049431	0.0402336
E7080 (Lenvatinib)	Sell 7	164010	233380	261750	293120	86232	95314	103620	111470		-0.272325	-0.277386	-0.29988	-0.325324			0.434601	0.492023	0.511038	0.51216				0.331046	0.478307	0.485412	0.495995		-0.103555	-0.0137164	-0.0256264	-0.0161651		-0.0813905	-0.0107379	-0.0197145	-0.0121971
Flavopiridol hydrochloride	Sell 8	143260	203890	239470	277620	61760	79173	87449	95718		-0.111354	-0.115975	-0.189235	-0.255242			0.506134	0.556211	0.552658	0.537957				0.52089	0.566653	0.565719	0.567217		0.0147566	0.0104418	0.0130604	0.0292599		0.0132781	0.00935668	0.0109822	0.0233102
JNJ-38877605	Sell 9	156770	228800	253560	280080	92173	100720	109300	120920		-0.216159	-0.252318	-0.259207	-0.266364			0.45956	0.501992	0.526337	0.533863				0.284958	0.448718	0.457204	0.453268		-0.174602	-0.0532746	-0.0691333	-0.0805952		-0.143568	-0.0425408	-0.0549022	-0.063643
LDN193189	Sell 10	159780	232650	254670	276160	77495	87449	91809	102500		-0.23951	-0.27339	-0.26472	-0.24864			0.449184	0.493612	0.524264	0.540387				0.398825	0.521355	0.544066	0.536553		-0.0503592	0.0277431	0.0198025	-0.00383433		-0.0406283	0.0217868	0.0156576	-0.00307081
Mifepristone (Mifeprex)	Sell 11	167100	234330	256260	280550	75693	95641	103410	111270		-0.296296	-0.282586	-0.272616	-0.268489			0.423949	0.489955	0.521294	0.533081				0.412804	0.476517	0.486454	0.4969		-0.0111454	-0.0134384	-0.0348391	-0.0361811		-0.0085979	-0.0104776	-0.027376	-0.028523
Panobinostat	Sell 12	46800	85029	111430	148710	9025	12827	12268	12321		0.636944	0.534601	0.446626	0.327617			0.838664	0.814925	0.791843	0.752502				0.929988	0.929792	0.939076	0.944291		0.0913232	0.114867	0.147233	0.191789		0.25154	0.246815	0.266063	0.285238
PD173074	Sell 13	155990	227580	247060	267740	59466	79698	83170	89071		-0.210109	-0.24564	-0.226927	-0.21057			0.462249	0.504648	0.53848	0.5544				0.538686	0.56378	0.586969	0.597271		0.0764372	0.0591321	0.0484889	0.0428707		0.0631656	0.0474713	0.0395206	0.0354136
Pioglitazone (Actos)	Sell 14	148290	221520	241970	263490	60600	77035	79835	88884		-0.150375	-0.212471	-0.20165	-0.191354			0.488794	0.517838	0.547988	0.561474				0.529889	0.578355	0.60353	0.598116		0.0410956	0.0605176	0.0555425	0.0366429		0.0357236	0.0499126	0.0462219	0.0307574
SNS-032 (BMS-387032)	Sell 15	156520	230610	254620	283190	66491	85268	89307	96466		-0.21422	-0.262225	-0.264471	-0.280426			0.460422	0.498052	0.524357	0.528687				0.484189	0.533293	0.556491	0.563835		0.0237672	0.0352403	0.0321343	0.0351481		0.019574	0.0279192	0.0254132	0.0274503
S-Ruxolitinib	Sell 16	160190	224850	247700	270100	71128	88454	94219	103510		-0.24269	-0.230698	-0.230106	-0.22124			0.44777	0.51059	0.537284	0.550473				0.448217	0.515854	0.532098	0.531986		0.000446902	0.00526475	-0.00518612	-0.0184866		0.000359625	0.00427786	-0.004216	-0.0151376
Tofacitinib (CP-690550, Tasocitinib)	Sell 17	142430	209600	231400	253160	77836	98525	103910	110650		-0.104915	-0.147228	-0.149158	-0.144647			0.508995	0.543783	0.567733	0.578666				0.396179	0.460732	0.483971	0.499703		-0.112816	-0.0830513	-0.0837619	-0.078963		-0.102104	-0.072393	-0.0728898	-0.0689845
Vincristine	Sell 18	7552	8184	7101	6438	4703	4413	3437	3345		0.941415	0.955206	0.964736	0.970891			0.973966	0.982187	0.986735	0.989285				0.963516	0.975846	0.982931	0.984876		-0.0104497	-0.00634083	-0.0038035	-0.00440945		-0.178367	-0.141554	-0.107857	-0.15148
Cladribine	Sell 19	121370	180390	200000	216010	60794	78375	80201	86046		0.0584597	0.0126504	0.00677771	0.0233242			0.581596	0.607362	0.62639	0.640495				0.528384	0.571021	0.601713	0.610948		-0.0532118	-0.0363407	-0.0246771	-0.0295462		-0.0565157	-0.0368063	-0.0248455	-0.0302518
BML-266	Sell 20	159460	248130	309890	399980	87988	104370	109600	115240		-0.237027	-0.358119	-0.538948	-0.808485			0.450287	0.459918	0.42111	0.334313				0.317424	0.42874	0.455714	0.478949		-0.132863	-0.0311787	0.0346041	0.144636		-0.107405	-0.0229573	0.0224856	0.0799764
GSK 269962	Sell 21	158840	226070	258890	298790	69628	87271	89024	93415		-0.232218	-0.237375	-0.285677	-0.35096			0.452424	0.507934	0.516381	0.502724				0.459854	0.522329	0.557897	0.57763		0.0074294	0.0143953	0.0415163	0.074906		0.00602929	0.0116337	0.0322914	0.0554465
Marimastat	Sell 22	164220	245440	296940	344210	85047	102660	106910	112450		-0.273954	-0.343395	-0.474637	-0.556324			0.433877	0.465773	0.445301	0.427131				0.340239	0.438099	0.469073	0.491564		-0.0936384	-0.0276742	0.0237717	0.064433		-0.0735022	-0.0206002	0.0161204	0.0414007
Pyroxamide	Sell 23	162770	247000	295620	334820	82797	103540	107970	112850		-0.262705	-0.351934	-0.468082	-0.513868			0.438876	0.462378	0.447767	0.442759				0.357694	0.433282	0.463809	0.489756		-0.0811824	-0.0290953	0.0160418	0.0469966		-0.0642925	-0.0215213	0.0109271	0.0310441
TCS PIM-1 4a	Sell 24	159560	231920	266850	311850	75026	96886	102270	108750		-0.237803	-0.269395	-0.325207	-0.41001			0.449942	0.495201	0.501511	0.480988				0.417978	0.469703	0.492116	0.508294		-0.0319641	-0.0254985	-0.00939513	0.0273055		-0.0258232	-0.0200871	-0.00708956	0.0193655
2-Methoxyestradiol	Sell 25	162110	237460	282900	314480	67500	85089	91039	99037		-0.257585	-0.299717	-0.404913	-0.421902			0.441151	0.483143	0.471529	0.476611				0.476362	0.534272	0.54789	0.55221		0.0352104	0.0511298	0.0763615	0.0755994		0.0279984	0.0393392	0.0543532	0.0531678
AZ 3146	Sell 26	158900	235930	273540	321440	59421	77038	80390	91254		-0.232683	-0.291343	-0.35843	-0.453371			0.452217	0.486473	0.489014	0.465027				0.539035	0.578339	0.600774	0.587401		0.0868181	0.0918661	0.111761	0.122373		0.0704302	0.07114	0.0822719	0.0841996
AZD8055	Sell 27	128480	199600	226510	285700	65087	86055	91575	100720		0.00330312	-0.0924939	-0.124874	-0.291775			0.557086	0.565549	0.576868	0.52451				0.495081	0.528985	0.545228	0.544601		-0.0620046	-0.0365639	-0.0316397	0.0200912		-0.0622101	-0.0334683	-0.0281273	0.0155532
BMS 794833	Sell 28	153240	229130	257250	315050	68528	88478	93389	100090		-0.188775	-0.254124	-0.277532	-0.424479			0.471729	0.501274	0.519444	0.475662				0.468387	0.515723	0.53622	0.547449		-0.00334236	0.0144493	0.0167756	0.071787		-0.0028116	0.0115214	0.0131313	0.0503952
Cyt387	Sell 29	150110	225350	255040	301610	66867	85954	89681	96837		-0.164494	-0.233434	-0.266557	-0.363711			0.482519	0.509501	0.523573	0.49803				0.481272	0.529538	0.554634	0.562158		-0.00124716	0.0200366	0.0310616	0.064127		-0.00107099	0.0162446	0.0245244	0.0470239
DAPT (GSI-IX)	Sell 30	143350	214730	239990	279450	64691	84915	90905	100650		-0.112052	-0.175307	-0.191817	-0.263516			0.505824	0.532617	0.551687	0.534911				0.498153	0.535225	0.548556	0.544917		-0.00767064	0.0026079	-0.00313109	0.0100059		-0.00689774	0.00221891	-0.00262716	0.00791907
Enzastaurin (LY317615)	Sell 31	149680	223170	248840	288040	62555	83021	89279	96429		-0.161158	-0.221502	-0.235767	-0.302355			0.484002	0.514246	0.535154	0.520615				0.514723	0.545592	0.556631	0.564002		0.0307213	0.0313451	0.021476	0.0433872		0.0264574	0.0256611	0.0173787	0.0333144
Formestane	Sell 32	158120	228230	258980	307590	67507	85485	89909	99726		-0.226632	-0.249198	-0.286124	-0.390749			0.454906	0.503233	0.516212	0.488078				0.476307	0.532105	0.553502	0.549095		0.0214012	0.0288723	0.0372894	0.0610171		0.0174471	0.0231126	0.0289937	0.0438735
Iniparib (BSI-201)	Sell 33	159140	229610	259340	307210	72512	92984	99925	107730		-0.234545	-0.256751	-0.287911	-0.389031			0.45139	0.500229	0.51554	0.48871				0.437481	0.49106	0.503761	0.512905		-0.0139093	-0.00916917	-0.0117787	0.0241951		-0.0112668	-0.00729593	-0.00914555	0.0174187
Linsitinib (OSI-906)	Sell 34	156600	222240	253880	298180	77300	95024	101770	110510		-0.214841	-0.216412	-0.260796	-0.348202			0.460146	0.516271	0.52574	0.503739				0.400337	0.479894	0.494599	0.500336		-0.059809	-0.0363765	-0.0311407	-0.00340317		-0.049232	-0.0299048	-0.0246992	-0.00252423
MK-2206 dihydrochloride	Sell 35	155400	223000	251000	317470	76223	93971	97010	105350		-0.205532	-0.220572	-0.246494	-0.435421			0.464283	0.514616	0.53112	0.471635				0.408692	0.485658	0.518238	0.523666		-0.0555909	-0.0289588	-0.012882	0.0520318		-0.0461131	-0.0237256	-0.0103346	0.0362485
Olaparib (AZD2281)	Sell 36	147480	210080	229040	252830	59364	74317	76965	85522		-0.144091	-0.149855	-0.137438	-0.143155			0.491586	0.542738	0.572142	0.579215				0.539478	0.593232	0.617783	0.613318		0.0478916	0.0504939	0.0456414	0.0341025		0.04186	0.0439133	0.0401265	0.0298319
PF 573228	Sell 37	139240	197830	217820	242330	68726	82308	86246	95827		-0.0801687	-0.0828059	-0.0817184	-0.0956801			0.519992	0.569402	0.593101	0.59669				0.466851	0.549494	0.571693	0.566724		-0.0531411	-0.0199076	-0.0214086	-0.029966		-0.0491971	-0.0183852	-0.0197913	-0.0273493
Quizartinib (AC220)	Sell 38	135280	193250	211630	232960	69198	85374	89205	95764		-0.0494486	-0.0577377	-0.0509782	-0.0533142			0.533644	0.57937	0.604665	0.612285				0.463189	0.532713	0.556998	0.567009		-0.0704542	-0.0466579	-0.0476666	-0.0452757		-0.0671345	-0.0441111	-0.0453545	-0.042984
SB590885	Sell 39	158000	216050	234940	252030	82799	92388	93472	98255		-0.225701	-0.182532	-0.166738	-0.139538			0.45532	0.529744	0.56112	0.580546				0.357678	0.494322	0.535808	0.555746		-0.0976418	-0.0354218	-0.0253128	-0.0248004		-0.079662	-0.0299542	-0.0216953	-0.0217635
Tipifarnib (Zarnestra)	Sell 40	135990	226670	287620	371110	81188	105790	110310	113010		-0.0549565	-0.240659	-0.428353	-0.677951			0.531196	0.506628	0.462712	0.382362				0.370176	0.420967	0.452188	0.489032		-0.16102	-0.085661	-0.0105233	0.106671		-0.152632	-0.0690447	-0.00736742	0.063572
Torin 2	Sell 41	77139	133860	169620	252400	49857	82474	95230	107200		0.401586	0.267328	0.157648	-0.141211			0.734075	0.708639	0.683141	0.579931				0.613229	0.548585	0.527077	0.515302		-0.120846	-0.160054	-0.156064	-0.0646289		-0.201944	-0.218452	-0.185272	-0.0566318
Vorinostat (SAHA)	Sell 42	144300	217180	260470	316750	68925	88124	93251	98820		-0.119422	-0.188717	-0.293523	-0.432166			0.502549	0.527284	0.513429	0.472833				0.465307	0.517661	0.536905	0.553191		-0.0372414	-0.0096236	0.0234761	0.0803585		-0.0332684	-0.00809579	0.0181489	0.0561098
Banoxantrone dihydrochloride	Sell 43	151000	228020	281340	341780	78488	96406	104000	111050		-0.171398	-0.248048	-0.397166	-0.545337			0.479451	0.50369	0.474443	0.431176				0.391121	0.47233	0.483524	0.497894		-0.0883301	-0.03136	0.00908154	0.0667187		-0.0754057	-0.0251272	0.00649997	0.0431742
CDIBA	Sell 44	146950	219390	260560	325790	63825	78007	81817	92419		-0.13998	-0.200813	-0.29397	-0.473039			0.493413	0.522474	0.513261	0.457788				0.504871	0.573035	0.593688	0.582133		0.0114579	0.0505613	0.0804267	0.124345		0.0100509	0.0421059	0.062155	0.0844142
GW 9508	Sell 45	146680	216110	244030	303100	67592	82956	88281	98005		-0.137885	-0.18286	-0.21188	-0.370448			0.494344	0.529613	0.54414	0.495551				0.475648	0.545947	0.561587	0.556876		-0.0186958	0.016334	0.0174469	0.0613258		-0.0164303	0.0138089	0.0143966	0.0447487
Necrostatin-1	Sell 46	138540	211710	245360	318780	70824	91175	96935	105580		-0.0747384	-0.158777	-0.218485	-0.441344			0.522405	0.53919	0.541655	0.469454				0.450576	0.500961	0.51861	0.522627		-0.0718297	-0.038229	-0.0230453	0.0531721		-0.0668346	-0.0329909	-0.0189131	0.0368906
QNZ	Sell 47	125510	162570	158280	153140	70097	84111	83165	78131		0.0263432	0.110187	0.213964	0.307587			0.567324	0.646149	0.704325	0.745129				0.456215	0.539625	0.586993	0.646736		-0.111109	-0.106523	-0.117332	-0.0983936		-0.114115	-0.119714	-0.14927	-0.142102
TTP 22	Sell 48	146350	221960	254960	315220	69897	92310	96202	105050		-0.135325	-0.214879	-0.26616	-0.425248			0.495482	0.51688	0.523722	0.475379				0.457767	0.494749	0.52225	0.525023		-0.0377147	-0.0221311	-0.00147188	0.0496436		-0.0332193	-0.0182167	-0.00116248	0.0348315
ABT-751	Sell 49	139940	211330	244640	302980	70435	89291	95676	103340		-0.085599	-0.156697	-0.21491	-0.369905			0.517579	0.540017	0.543	0.49575				0.453593	0.511273	0.524862	0.532755		-0.0639858	-0.0287442	-0.018138	0.0370042		-0.0589405	-0.0248503	-0.0149295	0.0270122
AMG 900	Sell 50	125310	187320	187190	175650	66766	87613	86122	75444		0.0278947	-0.0252803	0.0703936	0.205809			0.568014	0.592278	0.65032	0.707666				0.482056	0.520458	0.572309	0.658885		-0.0859577	-0.0718202	-0.0780112	-0.0487811		-0.0884243	-0.0700493	-0.0839185	-0.0614224
Azathioprine (Azasan, Imuran)	Sell 51	132610	199570	225490	274170	63796	85309	87658	94333		-0.0287358	-0.0923297	-0.119808	-0.239643			0.542848	0.565614	0.578773	0.543699				0.505096	0.533068	0.564681	0.573479		-0.037752	-0.032546	-0.0140929	0.0297803		-0.0366975	-0.029795	-0.0125851	0.0240233
Carboplatin	Sell 52	140480	208750	233970	276290	69836	87867	93088	101810		-0.0897881	-0.142576	-0.161921	-0.249228			0.515717	0.545633	0.562932	0.540171				0.45824	0.519067	0.537715	0.539672		-0.0574774	-0.0265657	-0.0252178	-0.000498182		-0.0527418	-0.0232508	-0.0217035	-0.000398792
Cisplatin	Sell 53	129430	199930	220250	246460	59361	79440	82154	88797		-0.0040666	-0.0943001	-0.093786	-0.114354			0.553811	0.564831	0.588562	0.589817				0.539501	0.565192	0.592014	0.59851		-0.0143096	0.000361054	0.00345205	0.00869323		-0.0142517	0.00032994	0.00315605	0.00780114
Dalcetrapib??JTT-705??	Sell 54	140610	201070	227200	259630	64994	83851	87757	95846		-0.0907966	-0.10054	-0.128301	-0.173901			0.515269	0.562349	0.575579	0.567898				0.495802	0.541049	0.564189	0.566638		-0.0194669	-0.0213009	-0.0113901	-0.00125956		-0.0178465	-0.0193549	-0.0100949	-0.00107297
Elesclomol	Sell 55	3805	6653	7390	7953	3614	5802	5653	5681		0.970482	0.963585	0.9633	0.964041			0.986883	0.985519	0.986195	0.986764				0.971964	0.968243	0.971927	0.974314		-0.0149188	-0.0172758	-0.0142685	-0.0124501		-0.505421	-0.474419	-0.388793	-0.346231
Fluvastatin sodium (Lescol)	Sell 56	147970	211790	239410	285980	62975	83242	87688	98510		-0.147893	-0.159215	-0.188937	-0.293041			0.489897	0.539016	0.55277	0.524044				0.511465	0.544382	0.564532	0.554593		0.0215681	0.0053657	0.0117614	0.0305496		0.0187893	0.00462873	0.00989238	0.0236262
IC-87114	Sell 57	132460	198300	218460	247280	68249	85983	91448	98143		-0.0275721	-0.0853785	-0.0848967	-0.118061			0.543365	0.568379	0.591906	0.588452				0.470551	0.529379	0.545859	0.556253		-0.0728138	-0.0389994	-0.0460468	-0.0321994		-0.07086	-0.0359316	-0.0424435	-0.0287993
Lenalidomide	Sell 58	130300	189970	210840	230870	60094	79598	83113	90974		-0.0108157	-0.0397849	-0.0470549	-0.0438644			0.550811	0.58651	0.60614	0.615763				0.533815	0.564327	0.587252	0.588667		-0.0169968	-0.0221828	-0.0188888	-0.0270964		-0.0168149	-0.021334	-0.0180399	-0.0259578
Mitoxantrone Hydrochloride	Sell 59	91131	79534	67057	53234	21964	15858	10123	7014		0.293042	0.564677	0.666987	0.759306			0.68584	0.826886	0.874734	0.911403				0.829612	0.913203	0.949728	0.968287		0.143772	0.0863169	0.0749939	0.056884		0.203367	0.198283	0.225198	0.236333
Nutlin-3	Sell 60	154470	230470	276090	339070	79148	96540	100340	105870		-0.198317	-0.261458	-0.371094	-0.533084			0.467489	0.498357	0.48425	0.435686				0.386001	0.471596	0.5017	0.521315		-0.0814879	-0.0267608	0.0174502	0.0856295		-0.0680019	-0.0212141	0.0127272	0.0558544
Pelitinib (EKB-569)	Sell 61	154920	221840	253580	318250	85851	103850	111110	115840		-0.201808	-0.214223	-0.259307	-0.438948			0.465938	0.517141	0.5263	0.470337				0.334002	0.431586	0.448215	0.476237		-0.131936	-0.0855556	-0.0780846	0.00590007		-0.109781	-0.0704612	-0.062006	0.00410027
Ponatinib (AP24534)	Sell 62	145620	224060	256670	305910	78658	95865	100940	108520		-0.129662	-0.226374	-0.274652	-0.383153			0.497998	0.512309	0.520528	0.490874				0.389802	0.475291	0.498721	0.509334		-0.108196	-0.0370183	-0.021807	0.0184595		-0.095777	-0.0301851	-0.0171082	0.013346
SB 216763	Sell 63	136420	202800	223180	259230	70993	85392	91481	98444		-0.0582922	-0.110009	-0.108337	-0.172092			0.529714	0.558584	0.583089	0.568564				0.449264	0.532614	0.545695	0.554892		-0.0804491	-0.0259699	-0.0373935	-0.013672		-0.0760179	-0.0233961	-0.0337384	-0.0116646
SU11274	Sell 64	153010	214570	243450	299070	65881	84738	92041	99001		-0.186991	-0.174431	-0.209	-0.352226			0.472522	0.532965	0.545223	0.502258				0.488921	0.536194	0.542914	0.552373		0.0163991	0.00322844	-0.00230914	0.0501153		0.0138157	0.00274894	-0.00190996	0.0370613
Topotecan HCl	Sell 65	70891	67866	57445	43948	25465	22363	17455	12303		0.450056	0.628541	0.714722	0.801292			0.755614	0.852282	0.89269	0.926857				0.802453	0.877598	0.913317	0.944373		0.0468382	0.0253157	0.0206266	0.0175154		0.0851689	0.068152	0.0723036	0.0881464
Y-27632 2HCl	Sell 66	136900	202590	228370	272150	52860	75194	79509	84165		-0.0620159	-0.108859	-0.134111	-0.230509			0.528059	0.559041	0.573393	0.547061				0.589933	0.588432	0.605149	0.619453		0.0618742	0.029391	0.031756	0.0723924		0.0582611	0.0265056	0.0280008	0.0588312
VX-680 (MK-0457, Tozasertib)	Sell 67	133600	196190	223430	264360	52301	67956	70111	75628		-0.0364158	-0.0738295	-0.109578	-0.195287			0.539435	0.572971	0.582622	0.560026				0.59427	0.628049	0.651821	0.658053		0.0548345	0.0550773	0.0691993	0.098027		0.0529078	0.0512905	0.0623654	0.0820113
CGS 9343B	Sell 68	139900	201360	230130	271030	54596	74914	78093	85808		-0.0852887	-0.102127	-0.142851	-0.225445			0.517717	0.561718	0.570106	0.548925				0.576466	0.589964	0.612181	0.612024		0.058749	0.0282463	0.0420758	0.0630997		0.0541322	0.0256289	0.0368165	0.0514912
GSK 3787	Sell 69	131730	191660	215440	252570	58219	81645	84799	93030		-0.0219091	-0.049035	-0.0698991	-0.14198			0.545882	0.582831	0.597547	0.579648				0.54836	0.553123	0.578879	0.579371		0.00247845	-0.0297084	-0.0186686	-0.00027715		0.00242531	-0.0283197	-0.017449	-0.000242692
MG 149	Sell 70	128970	191260	215990	254940	53114	74846	76820	83208		-0.000498103	-0.0468456	-0.0726304	-0.152695			0.555396	0.583702	0.59652	0.575703				0.587963	0.590337	0.618503	0.62378		0.0325664	0.00663474	0.0219834	0.0480768		0.0325501	0.00633784	0.0204948	0.0417082
S-(+)-Niguldipine hydrochloride	Sell 71	128680	189780	212540	249530	55592	74633	78839	83360		0.0017516	-0.0387449	-0.0554973	-0.128234			0.556396	0.586923	0.602965	0.584707				0.568739	0.591503	0.608477	0.623093		0.0123433	0.00457919	0.00551204	0.0383857		0.0123649	0.00440839	0.00522222	0.0340228
U 73122	Sell 72	134320	194030	216190	249820	63719	80183	83276	88972		-0.0420013	-0.062007	-0.0736236	-0.129546			0.536953	0.577673	0.596146	0.584225				0.505693	0.561125	0.586442	0.597719		-0.0312598	-0.0165477	-0.00970421	0.013494		-0.0299997	-0.0155815	-0.00903875	0.0119464
3-Methyladenine	Sell 73	126580	184160	205330	234500	57137	72675	77475	85801		0.0180426	-0.00798435	-0.0196917	-0.0602772			0.563635	0.599156	0.616433	0.609722				0.556754	0.602219	0.615251	0.612056		-0.00688163	0.00306361	-0.00118282	0.00233443		-0.00700808	0.00303934	-0.00115998	0.00220171
AZ628	Sell 74	134260	190680	208520	231620	57187	69031	71855	77234		-0.0415358	-0.043671	-0.0355336	-0.0472555			0.53716	0.584964	0.610474	0.614515				0.556366	0.622165	0.64316	0.650791		0.0192061	0.0372002	0.0326858	0.0362764		0.0184401	0.0356436	0.0315642	0.0346395
Bafetinib (INNO-406)	Sell 75	98537	145490	162890	179480	52321	68870	69976	75644		0.235589	0.203673	0.19107	0.188492			0.660309	0.683325	0.695713	0.701291				0.594114	0.623046	0.652491	0.65798		-0.0661948	-0.0602795	-0.043222	-0.0433111		-0.0865959	-0.0756969	-0.0534311	-0.0533712
Bortezomib (Velcade)	Sell 76	9875	9824	8398	8941	5761	5583	4754	4375		0.923394	0.946229	0.958295	0.959574			0.965957	0.978617	0.984312	0.985119				0.955308	0.969442	0.976391	0.980219		-0.0106491	-0.00917509	-0.00792101	-0.00490079		-0.13901	-0.170633	-0.189928	-0.121228
Cytarabine	Sell 77	141760	195090	223170	293320	63203	72962	74197	78745		-0.0997178	-0.0678088	-0.108287	-0.326228			0.511305	0.575366	0.583107	0.511828				0.509696	0.600649	0.631529	0.643959		-0.0016086	0.0252831	0.0484221	0.132132		-0.00146274	0.0236775	0.0436909	0.0996298
Dasatinib (BMS-354825)	Sell 78	80452	123700	144570	192800	56966	76473	84139	93926		0.375885	0.322938	0.282049	0.128267			0.722654	0.730754	0.729936	0.679123				0.55808	0.581431	0.582156	0.575319		-0.164574	-0.149322	-0.14778	-0.103804		-0.263692	-0.220544	-0.205835	-0.119077
Epirubicin Hydrochloride	Sell 79	139320	181770	195180	210710	34346	37927	34340	30285		-0.0807893	0.00509712	0.0307144	0.0472878			0.519716	0.604358	0.635394	0.649315				0.733557	0.79241	0.829464	0.863068		0.213841	0.188052	0.19407	0.213753		0.197856	0.189015	0.200219	0.224362
GDC-0879	Sell 80	150320	206520	238210	295310	62771	78801	85049	90759		-0.166123	-0.13037	-0.182977	-0.335226			0.481796	0.550487	0.555012	0.508516				0.513047	0.568689	0.577637	0.589639		0.0312519	0.0182024	0.0226253	0.0811232		0.0267999	0.0161031	0.0191257	0.0607562
INK 128	Sell 81	95670	150590	177820	227080	52222	77538	83361	91384		0.25783	0.175758	0.116926	-0.0267282			0.670193	0.672225	0.667823	0.622071				0.594882	0.575602	0.58602	0.586813		-0.0753104	-0.0966223	-0.0818034	-0.0352579		-0.101473	-0.117226	-0.0926348	-0.03434
Lomustine (CeeNU)	Sell 82	136000	198220	228850	292900	55041	73725	79040	87731		-0.0550341	-0.0849406	-0.136495	-0.324329			0.531161	0.568553	0.572497	0.512527				0.573014	0.596472	0.607479	0.60333		0.0418523	0.0279196	0.0349817	0.0908032		0.0396691	0.0257338	0.0307804	0.0685654
NPI-2358 (Plinabulin)	Sell 83	128290	191890	223940	281390	63860	82926	90966	94123		0.00477707	-0.0502939	-0.112111	-0.272287			0.55774	0.582331	0.581669	0.531683				0.504599	0.546111	0.548253	0.574429		-0.053141	-0.0362192	-0.0334162	0.042746		-0.0533961	-0.0344848	-0.0300476	0.0335978
OSI-930	Sell 84	130730	191440	225930	278770	60052	78973	81876	87822		-0.0141515	-0.0478308	-0.121994	-0.260441			0.549329	0.58331	0.577952	0.536043				0.53414	0.567748	0.593395	0.602918		-0.0151886	-0.0155623	0.0154431	0.0668752		-0.0149766	-0.0148519	0.013764	0.0530569
PF-04217903	Sell 85	123970	181620	209700	257570	61715	77709	80822	87713		0.0382899	0.00591813	-0.0413936	-0.164587			0.572633	0.604684	0.60827	0.571326				0.52124	0.574666	0.598629	0.603411		-0.0513935	-0.0300182	-0.00964102	0.0320848		-0.0534397	-0.0301969	-0.00925781	0.0275504
R406(free base)	Sell 86	126750	188060	204780	231420	54510	74488	80132	87456		0.0167238	-0.0293307	-0.0169603	-0.0463512			0.563049	0.590667	0.617461	0.614848				0.577133	0.592296	0.602056	0.604573		0.0140836	0.00162907	-0.0154052	-0.0102746		0.0143232	0.00158265	-0.0151483	-0.00981945
SB939 (Pracinostat)	Sell 87	115130	169250	185700	211510	44322	61540	61827	66503		0.106867	0.0736243	0.0777931	0.0436706			0.603108	0.631609	0.653103	0.647984				0.656168	0.663166	0.69296	0.699311		0.05306	0.0315569	0.0398571	0.0513269		0.0594088	0.0340649	0.0432192	0.0536707
TAK-733	Sell 88	117500	171840	206130	266570	61635	94242	102840	113540		0.0884816	0.0594481	-0.0236646	-0.20528			0.594937	0.625972	0.614939	0.556348				0.52186	0.484174	0.489285	0.486636		-0.0730772	-0.141797	-0.125654	-0.0697116		-0.0801708	-0.15076	-0.122749	-0.0578386
Tosedostat (CHR2797)	Sell 89	124990	180280	201170	233190	55278	73766	77946	84016		0.0303772	0.0132525	0.000967357	-0.0543541			0.569117	0.607601	0.624204	0.611902				0.571175	0.596248	0.612911	0.620127		0.00205848	-0.0113531	-0.0112929	0.00822496		0.00212297	-0.0115056	-0.0113039	0.00780095
WAY-362450	Sell 90	125450	182260	199970	227750	53260	74095	77706	88871		0.0268087	0.00241514	0.00692669	-0.0297575			0.567531	0.603291	0.626446	0.620956				0.58683	0.594447	0.614103	0.598175		0.0192991	-0.0088442	-0.0123427	-0.0227804		0.0198307	-0.00886561	-0.0124288	-0.0221221
1,4-PB-ITU dihydrobromide	Sell 91	127190	184090	205510	245450	52902	72437	77239	85992		0.0133104	-0.00760121	-0.0205856	-0.109787			0.561533	0.599308	0.616097	0.591498				0.589607	0.603522	0.616423	0.611192		0.0280747	0.00421392	0.00032543	0.0196949		0.0284534	0.00418213	0.000318866	0.0177466
CGP 3466B	Sell 92	131950	186550	210180	253310	51324	69838	74812	83962		-0.0236158	-0.0210658	-0.0437773	-0.145325			0.545123	0.593954	0.607373	0.578416				0.601849	0.617748	0.628475	0.620371		0.0567255	0.0237938	0.021102	0.0419548		0.0554168	0.0233029	0.0202169	0.0366314
HLI 373	Sell 93	119770	172820	196120	232200	60750	77473	82797	87527		0.0708718	0.0540842	0.0260462	-0.0498779			0.587112	0.623839	0.633638	0.61355				0.528726	0.575958	0.588821	0.604252		-0.0583863	-0.0478806	-0.0448172	-0.00929747		-0.0628398	-0.0506182	-0.0460157	-0.00885576
NF??B Activation Inhibitor III	Sell 94	111210	161830	184510	205750	43060	61484	62497	68961		0.137277	0.114237	0.0837028	0.0697141			0.616621	0.64776	0.655326	0.65757				0.665958	0.663472	0.689633	0.688197		0.0493365	0.015713	0.0343068	0.0306268		0.057187	0.0177395	0.0374407	0.0329219
SA4503	Sell 95	140570	216600	310580	342910	99232	123880	132300	135910		-0.0904863	-0.185542	-0.542375	-0.550446			0.515407	0.528547	0.419821	0.429295				0.230198	0.321953	0.342983	0.385491		-0.28521	-0.206594	-0.0768376	-0.0438036		-0.261544	-0.174261	-0.0498177	-0.0282522
UNC 0224	Sell 96	143980	218270	296900	402290	81917	97979	105790	110700		-0.11694	-0.194683	-0.474438	-0.818929			0.503652	0.524912	0.445376	0.330469				0.36452	0.46372	0.474635	0.499477		-0.139131	-0.0611916	0.0292591	0.169008		-0.124565	-0.05122	0.0198442	0.0929162
(-)-Epigallocatechin gallate	Sell 97	134620	211190	285510	379120	70625	85485	90640	97612		-0.0443286	-0.155931	-0.417874	-0.714168			0.535919	0.540322	0.466653	0.369031				0.452119	0.532105	0.549872	0.558653		-0.0837996	-0.00821714	0.0832186	0.189623		-0.0802425	-0.00710868	0.0586925	0.110621
Aminoglutethimide (Cytadren)	Sell 98	137300	201200	249100	319500	71443	87166	93110	100190		-0.0651189	-0.101251	-0.237058	-0.444599			0.52668	0.562066	0.534669	0.468256				0.445774	0.522904	0.537605	0.546997		-0.0809064	-0.0391623	0.00293657	0.0787409		-0.07596	-0.0355616	0.00237383	0.0545071
AZD6244 (Selumetinib)	Sell 99	126620	187610	228900	344660	70646	92928	101340	109680		0.0177323	-0.0268676	-0.136743	-0.558359			0.563498	0.591647	0.572403	0.426382				0.451956	0.491366	0.496734	0.504089		-0.111541	-0.10028	-0.0756691	0.0777063		-0.113555	-0.0976564	-0.0665666	0.0498642
Bleomycin sulfate	Sell 100	141550	197840	241880	369140	53319	68795	70756	75843		-0.0980888	-0.0828607	-0.201203	-0.669044			0.512029	0.56938	0.548156	0.38564				0.586372	0.623456	0.648618	0.657081		0.0743436	0.0540765	0.100462	0.27144		0.0677027	0.0499385	0.0836342	0.162632
Clofarabine	Sell 101	139860	192550	231510	305910	63199	79010	85667	91571		-0.0849784	-0.0539063	-0.149704	-0.383153			0.517855	0.580894	0.567528	0.490874				0.509727	0.567545	0.574568	0.585967		-0.00812752	-0.0133487	0.00704034	0.0950934		-0.00749095	-0.012666	0.00612361	0.0687512
Danusertib (PHA-739358)	Sell 102	132590	188390	219830	272870	57426	74101	79912	87545		-0.0285806	-0.0311369	-0.0917003	-0.233765			0.542917	0.589949	0.589347	0.545862				0.554512	0.594414	0.603148	0.604171		0.0115949	0.00446557	0.0138015	0.0583082		0.0112728	0.00433072	0.0126422	0.0472604
Exemestane	Sell 103	126500	182070	204810	281410	50369	65978	71162	76843		0.0186632	0.00345509	-0.0171093	-0.272378			0.563911	0.603705	0.617405	0.531649				0.609257	0.638875	0.646602	0.652559		0.045346	0.03517	0.0291969	0.12091		0.0462084	0.0352919	0.0287057	0.0950266
Fludarabine (Fludara)	Sell 104	118700	175010	199230	279930	58563	76698	82454	91730		0.0791725	0.0420974	0.0106016	-0.265686			0.590801	0.619072	0.627828	0.534113				0.545691	0.5802	0.590524	0.585248		-0.045109	-0.0388719	-0.0373042	0.051136		-0.0489875	-0.0405802	-0.0377039	0.0404018
Idarubicin HCl	Sell 105	40625	46763	43150	38358	9859	9677	7180	6483		0.684847	0.744047	0.785712	0.826567			0.859952	0.898215	0.919394	0.936161				0.923518	0.947034	0.964343	0.970688		0.0635661	0.0488185	0.0449497	0.0345267		0.201699	0.190732	0.209763	0.199078
MDV3100 (Enzalutamide)	Sell 106	117190	174100	195030	275510	56810	75483	82536	88118		0.0908865	0.0470782	0.0314593	-0.245701			0.596006	0.621053	0.635674	0.541469				0.559291	0.58685	0.590117	0.60158		-0.0367154	-0.0342024	-0.0455572	0.0601112		-0.040386	-0.0358922	-0.047037	0.0482549
MK-0752	Sell 107	119620	179740	208730	314170	49856	67361	71434	79010		0.0720355	0.0162082	-0.0365764	-0.4205			0.587629	0.608776	0.610082	0.477127				0.613237	0.631305	0.645251	0.642761		0.025608	0.0225287	0.0351688	0.165634		0.0275959	0.0228999	0.0339279	0.116603
NVP-BSK805	Sell 108	123940	182170	216370	284360	58203	76992	82629	90085		0.0385226	0.00290775	-0.0745175	-0.285716			0.572736	0.603487	0.59581	0.52674				0.548484	0.578591	0.589655	0.592686		-0.0242522	-0.0248966	-0.00615489	0.0659466		-0.0252239	-0.0249692	-0.00572805	0.0512917
PI-103	Sell 109	111550	169280	190140	224070	59273	81207	88245	94568		0.134639	0.0734601	0.0557436	-0.0131186			0.615449	0.631544	0.644809	0.62708				0.540184	0.55552	0.561765	0.572417		-0.0752654	-0.0760235	-0.0830435	-0.0546637		-0.0869758	-0.082051	-0.0879459	-0.0539558
Procarbazine hydrochloride (Matulane)	Sell 110	119470	175180	198240	232580	59010	76063	81397	87024		0.0731991	0.0411669	0.0155181	-0.0515961			0.588146	0.618702	0.629678	0.612917				0.542224	0.583676	0.595773	0.606526		-0.0459222	-0.0350263	-0.0339044	-0.00639075		-0.0495492	-0.0365301	-0.0344388	-0.00607719
SB 431542	Sell 111	109410	158590	182750	272810	47256	65756	72102	81826		0.151241	0.131971	0.0924431	-0.233494			0.622826	0.654812	0.658614	0.545962				0.633407	0.64009	0.641933	0.630029		0.0105804	-0.0147217	-0.0166805	0.0840665		0.0124657	-0.0169599	-0.0183795	0.0681532
SB 743921	Sell 112	7038	8135	6955	7294	4797	4364	3795	3395		0.945402	0.955474	0.965461	0.967021			0.975738	0.982293	0.987008	0.987861				0.962787	0.976114	0.981154	0.98465		-0.0129508	-0.00617928	-0.00585411	-0.00321088		-0.237203	-0.138778	-0.169491	-0.0973602
Toremifene Citrate (Fareston, Acapodene)	Sell 113	100760	148420	168000	225480	35573	50807	54569	58963		0.218344	0.187636	0.165693	-0.0194939			0.652646	0.676948	0.686168	0.624734				0.724039	0.721912	0.729004	0.733402		0.071393	0.0449643	0.0428366	0.108669		0.0913355	0.0553499	0.051344	0.106591
YM155	Sell 114	2074	3459	3976	4157	1596	2778	2730	3064		0.983911	0.981067	0.980255	0.981204			0.99285	0.992471	0.992573	0.993082				0.987619	0.984795	0.986443	0.986146		-0.00523135	-0.00767626	-0.00613012	-0.00693519		-0.325145	-0.405453	-0.31046	-0.368979
Adrucil (Fluorouracil)	Sell 115	137810	208970	278770	380410	74656	87532	92617	98374		-0.0690753	-0.14378	-0.384403	-0.72			0.524922	0.545154	0.479244	0.366884				0.420848	0.520901	0.540054	0.555208		-0.104073	-0.0242533	0.0608099	0.188324		-0.097349	-0.0212045	0.043925	0.109491
CCT 018159	Sell 116	138600	216170	299900	397420	67314	82743	87653	92758		-0.0752038	-0.183188	-0.489337	-0.79691			0.522198	0.529483	0.439772	0.338574				0.477805	0.547113	0.564705	0.5806		-0.0443937	0.0176305	0.124934	0.242027		-0.0412886	0.0149008	0.0838854	0.13469
GSK 650394	Sell 117	139380	204930	229100	397350	68084	84151	90276	96169		-0.0812548	-0.121667	-0.137736	-0.796593			0.519509	0.553948	0.57203	0.33869				0.471831	0.539407	0.551679	0.565178		-0.0476781	-0.0145412	-0.0203505	0.226487		-0.0440952	-0.0129639	-0.0178868	0.126065
Pentostatin	Sell 118	126680	186580	223330	359150	68062	80874	89231	98423		0.0172668	-0.02123	-0.109082	-0.623874			0.563291	0.593888	0.582808	0.402267				0.472002	0.557343	0.556869	0.554987		-0.0912887	-0.0365455	-0.0259395	0.15272		-0.0928927	-0.0357858	-0.0233883	0.0940466
SMER 3	Sell 119	132050	195370	258360	400510	75151	87922	95028	101390		-0.0243915	-0.0693413	-0.283045	-0.810881			0.544778	0.574756	0.517371	0.333431				0.417008	0.518766	0.52808	0.541571		-0.12777	-0.0559898	0.0107097	0.20814		-0.124728	-0.0523591	0.0083471	0.114939
VER 155008	Sell 120	129530	185240	245690	323970	64690	77763	82460	91541		-0.00484236	-0.0138956	-0.220124	-0.46481			0.553466	0.596805	0.541039	0.460817				0.498161	0.574371	0.590494	0.586103		-0.0553052	-0.0224344	0.0494556	0.125286		-0.0550386	-0.0221269	0.0405333	0.0855307
A-769662	Sell 121	126710	182920	217270	291370	55375	70657	77620	85914		0.0170341	-0.00119731	-0.078987	-0.317411			0.563187	0.601855	0.594129	0.515073				0.570423	0.613265	0.61453	0.611545		0.00723542	0.01141	0.0204016	0.0964722		0.0073608	0.0113963	0.0189081	0.0732286
Andarine (GTX-007)	Sell 122	126720	183870	255840	292320	53439	72467	77555	86723		0.0169565	-0.00639706	-0.27053	-0.321707			0.563153	0.599787	0.522078	0.513492				0.585441	0.603358	0.614853	0.607887		0.0222886	0.00357086	0.0927751	0.0943955		0.0226731	0.00354816	0.0730208	0.0714194
Barasertib (AZD1152-HQPA)	Sell 123	104220	136670	128030	109790	55554	74884	68806	56258		0.191503	0.251948	0.364189	0.503591			0.640718	0.702523	0.760834	0.817277				0.569034	0.590129	0.658302	0.745633		-0.0716839	-0.112394	-0.102532	-0.0716436		-0.0886631	-0.150249	-0.161261	-0.144324
Bosutinib (SKI-606)	Sell 124	130670	191850	227680	310560	53153	68268	71146	80161		-0.013686	-0.0500749	-0.130684	-0.404178			0.549536	0.582418	0.574682	0.483135				0.58766	0.626341	0.646681	0.637557		0.0381243	0.0439231	0.0719986	0.154422		0.0376096	0.0418285	0.063677	0.109973
Crenolanib (CP-868596)	Sell 125	124810	184580	216180	248290	49229	67929	73990	81660		0.0317735	-0.0102832	-0.073574	-0.122628			0.569737	0.598242	0.596165	0.586771				0.618101	0.628196	0.632557	0.630779		0.0483637	0.0299546	0.0363924	0.0440084		0.0499508	0.0296497	0.0338984	0.0392012
Daunorubicin HCl (Daunomycin HCl)	Sell 126	114870	158200	171170	210220	21472	28415	26641	21635		0.108884	0.134106	0.149951	0.0495033			0.604004	0.655661	0.680246	0.650131				0.833429	0.844473	0.867698	0.902179		0.229425	0.188812	0.187452	0.252048		0.257458	0.218055	0.220519	0.265175
Erlotinib HCl	Sell 127	83857	140200	174940	270140	52266	85063	93455	105360		0.349471	0.232627	0.131228	-0.221421			0.710916	0.69484	0.673203	0.550406				0.594541	0.534415	0.535892	0.523621		-0.116375	-0.160425	-0.137311	-0.0267847		-0.178893	-0.209057	-0.158052	-0.0219292
GW3965 HCl	Sell 128	116500	161720	183760	223550	42871	60944	64788	71482		0.0962392	0.114839	0.0874274	-0.0107675			0.598385	0.647999	0.656727	0.627946				0.667424	0.666428	0.678256	0.676799		0.0690391	0.0184292	0.0215284	0.0488528		0.0763909	0.0208201	0.0235909	0.0483324
Ispinesib (SB-715992)	Sell 129	102920	147170	186260	278700	44833	64575	68682	76312		0.201587	0.194477	0.0750121	-0.260125			0.6452	0.679669	0.652057	0.53616				0.652203	0.646554	0.658918	0.65496		0.00700381	-0.0331145	0.00686049	0.1188		0.00877217	-0.0411093	0.00741684	0.0942767
Lonidamine	Sell 130	125260	172020	199060	308050	49498	68726	71740	76067		0.0282826	0.0584629	0.0114459	-0.392829			0.568186	0.62558	0.628146	0.487312				0.616014	0.623834	0.643731	0.656068		0.0478282	-0.00174589	0.0155852	0.168755		0.0492203	-0.0018543	0.0157656	0.12116
NU7441(KU-57788)	Sell 131	101800	149190	166500	228180	51951	69225	76593	80658		0.210276	0.183421	0.173142	-0.0317017			0.649061	0.675272	0.68897	0.62024				0.596985	0.621103	0.619631	0.63531		-0.0520758	-0.0541691	-0.0693391	0.0150698		-0.0659418	-0.0663366	-0.0838586	0.0146067
Oxaliplatin (Eloxatin)	Sell 132	85723	130080	142330	172530	51588	73363	76324	82643		0.334995	0.288018	0.293173	0.219916			0.704484	0.716867	0.73412	0.712858				0.599801	0.598454	0.620967	0.626335		-0.104683	-0.118413	-0.113154	-0.0865235		-0.157416	-0.166315	-0.160087	-0.110916
PF-3845	Sell 133	67899	115250	126820	145990	37390	56330	57560	62324		0.473266	0.369189	0.370198	0.339915			0.765929	0.749146	0.763094	0.757029				0.709943	0.691682	0.714151	0.718206		-0.0559857	-0.0574635	-0.0489433	-0.038823		-0.106289	-0.0910945	-0.0777122	-0.0588151
Saracatinib (AZD0530)	Sell 134	142850	212640	266940	418640	81769	92365	99111	102300		-0.108174	-0.163867	-0.325654	-0.892855			0.507547	0.537166	0.501343	0.303257				0.365669	0.494448	0.507804	0.537457		-0.141879	-0.0427182	0.00646094	0.234199		-0.128029	-0.0367036	0.00487378	0.123728
SGI-1776 free base	Sell 135	142350	211010	269080	414620	73775	84216	92463	97042		-0.104295	-0.154946	-0.336281	-0.874679			0.509271	0.540714	0.497345	0.309948				0.427683	0.539051	0.540818	0.561231		-0.0815881	-0.00166317	0.0434733	0.251283		-0.0738825	-0.00144004	0.032533	0.13404
TAME	Sell 136	139860	204350	258990	371850	64144	79895	89102	97177		-0.0849784	-0.118493	-0.286173	-0.681297			0.517855	0.55521	0.516194	0.38113				0.502396	0.562701	0.55751	0.56062		-0.0154585	0.00749126	0.0413158	0.17949		-0.0142477	0.00669764	0.032123	0.106757
TPCA-1	Sell 137	135110	195290	256630	393900	66504	77808	83714	91595		-0.0481298	-0.0689035	-0.274453	-0.780994			0.53423	0.57493	0.520602	0.344432				0.484088	0.574124	0.584267	0.585859		-0.0501413	-0.000805792	0.0636646	0.241427		-0.0478388	-0.000753849	0.0499544	0.135557
WP1130	Sell 138	130920	188270	237470	367840	60703	73816	80258	86329		-0.0156254	-0.0304801	-0.179302	-0.663166			0.548674	0.59021	0.556394	0.387804				0.52909	0.595974	0.60143	0.609669		-0.0195838	0.0057643	0.0450356	0.221865		-0.0192825	0.0055938	0.0381883	0.133399
4-Phenylbutyrate	Sell 139	139190	191400	231160	335290	73444	84451	91263	97343		-0.0797808	-0.0476119	-0.147966	-0.515993			0.520164	0.583397	0.568182	0.441977				0.430251	0.537765	0.546778	0.55987		-0.0899139	-0.0456327	-0.0214038	0.117893		-0.0832705	-0.0435588	-0.018645	0.077766
Fenretinide	Sell 140	134470	190940	227540	322020	62490	78043	83891	92176		-0.0431649	-0.0450941	-0.129989	-0.455993			0.536436	0.584398	0.574944	0.464062				0.515227	0.572838	0.583388	0.583232		-0.0212086	-0.0115603	0.00844399	0.11917		-0.020331	-0.0110615	0.00747263	0.0818477
ITX 3	Sell 141	128760	186890	211870	270970	54227	71129	74796	81069		0.00113099	-0.0229268	-0.05217	-0.225174			0.55612	0.593214	0.604216	0.549025				0.579328	0.610681	0.628555	0.633452		0.0232082	0.0174676	0.0243384	0.0844269		0.0232345	0.0170761	0.0231317	0.0689101
NSC 23766	Sell 142	135880	186820	214620	282770	55176	71932	75186	83005		-0.0541031	-0.0225436	-0.0658268	-0.278527			0.531575	0.593366	0.599079	0.529386				0.571966	0.606286	0.626618	0.624698		0.0403913	0.0129201	0.0275388	0.0953121		0.0383182	0.0126353	0.025838	0.0745484
SR 33805	Sell 143	127660	182620	217260	296790	50952	65351	67719	75032		0.00966436	0.000444715	-0.0789374	-0.341918			0.559912	0.602508	0.594148	0.506052				0.604735	0.642307	0.6637	0.660747		0.0448223	0.0397989	0.0695524	0.154695		0.0452597	0.0398166	0.0644638	0.115279
Lapatinib Ditosylate (Tykerb)	Sell 144	131900	180950	215850	286520	45235	62667	66085	72088		-0.0232279	0.00958532	-0.0719352	-0.295482			0.545296	0.606143	0.596781	0.523145				0.649085	0.656997	0.671815	0.674059		0.103789	0.0508546	0.0750331	0.150914		0.101433	0.0513468	0.0699978	0.116492
17-DMAG HCl (Alvespimycin)	Sell 145	111950	163880	188620	242710	51316	68734	73190	76707		0.131536	0.103017	0.0632921	-0.0973982			0.61407	0.643297	0.647648	0.596058				0.601911	0.62379	0.63653	0.653174		-0.0121592	-0.0195073	-0.0111181	0.0571163		-0.0140009	-0.0217476	-0.0118694	0.052047
Amuvatinib (MP-470)	Sell 146	120100	171980	196770	256900	48032	60663	63661	70742		0.0683118	0.0586819	0.0228182	-0.161557			0.585974	0.625667	0.632424	0.572441				0.627387	0.667966	0.683852	0.680144		0.0414126	0.0422992	0.0514285	0.107703		0.044449	0.0449361	0.0526294	0.092723
AZD7762	Sell 147	121220	180050	212180	272130	87868	116600	121710	126160		0.0596233	0.0145114	-0.0537095	-0.230419			0.582113	0.608102	0.603637	0.547094				0.318355	0.3618	0.395575	0.429575		-0.263758	-0.246302	-0.208063	-0.117519		-0.280482	-0.249929	-0.197457	-0.0955111
BMS 777607	Sell 148	116560	167350	194200	226110	48179	66153	69074	75911		0.0957738	0.0840238	0.0355812	-0.0223424			0.598178	0.635745	0.637225	0.623685				0.626246	0.637917	0.656971	0.656773		0.0280686	0.00217245	0.0197461	0.033088		0.0310416	0.00237173	0.0204746	0.0323649
Coenzyme Q10(CoQ10)	Sell 149	120770	171040	201240	251930	54310	72182	78950	83001		0.0631142	0.0638269	0.000619729	-0.139086			0.583665	0.627713	0.624074	0.580713				0.578685	0.604918	0.607926	0.624716		-0.00497995	-0.0227951	-0.0161482	0.0440032		-0.00531542	-0.0243492	-0.0161582	0.0386303
Dapagliflozin	Sell 150	125540	173770	220310	300020	52224	66711	71602	75749		0.0261105	0.0488844	-0.094084	-0.356522			0.567221	0.621771	0.58845	0.500677				0.594867	0.634863	0.644416	0.657506		0.0276462	0.0130921	0.0559665	0.156829		0.0283874	0.013765	0.0511538	0.115611
Ezetimibe (Zetia)	Sell 151	123060	170040	206760	259690	59681	74248	79725	83287		0.0453493	0.0693003	-0.0267932	-0.174172			0.57577	0.62989	0.613762	0.567798				0.537018	0.59361	0.604077	0.623423		-0.0387516	-0.0362798	-0.00968526	0.055625		-0.0405925	-0.0389812	-0.00943253	0.0473738
Flutamide (Eulexin)	Sell 152	113200	163410	185900	226520	50132	70222	70685	74490		0.121839	0.105589	0.0767999	-0.0241962			0.609761	0.64432	0.65273	0.623003				0.611096	0.615646	0.64897	0.663198		0.00133494	-0.0286747	-0.00375913	0.0401953		0.00152016	-0.0320599	-0.00407185	0.0392457
Imatinib (Gleevec)	Sell 153	135460	199090	260070	359530	74310	83068	87068	89530		-0.0508449	-0.0897025	-0.291537	-0.625593			0.533023	0.566659	0.514176	0.401634				0.423532	0.545334	0.567611	0.595196		-0.109491	-0.0213249	0.0534343	0.193561		-0.104193	-0.0195694	0.0413727	0.119071
Medroxyprogesterone acetate	Sell 154	137900	200780	271000	371300	74496	81271	91969	96164		-0.0697735	-0.0989525	-0.345816	-0.67881			0.524612	0.562981	0.493759	0.382045				0.42209	0.55517	0.543272	0.5652		-0.102522	-0.00781065	0.0495132	0.183155		-0.0958352	-0.00710736	0.0367905	0.109098
MK-1775	Sell 155	138930	195770	236570	327810	71247	86339	94218	99121		-0.0777638	-0.0715307	-0.174833	-0.482173			0.521061	0.573885	0.558075	0.454426				0.447294	0.527431	0.532103	0.551831		-0.0737667	-0.0464547	-0.0259725	0.0974047		-0.0684443	-0.0433536	-0.0221074	0.0657175
Obatoclax mesylate (GX15-070)	Sell 156	127680	178320	212230	303330	67166	76777	79799	84585		0.00950921	0.0239804	-0.0539578	-0.371488			0.559843	0.611867	0.603544	0.495168				0.478953	0.579768	0.603709	0.617554		-0.0808906	-0.0320997	0.000165479	0.122386		-0.0816672	-0.0328884	0.000157008	0.0892361
PIK-75	Sell 157	104090	147420	180570	254270	41859	50021	53215	60585		0.192511	0.193109	0.103269	-0.149666			0.641166	0.679124	0.662686	0.576818				0.675274	0.726214	0.735728	0.726069		0.0341083	0.0470898	0.0730421	0.14925		0.04224	0.0583596	0.0814538	0.12982
Quercetin (Sophoretin)	Sell 158	135700	189280	224970	315350	58582	71184	77843	84164		-0.0527068	-0.0360082	-0.117226	-0.425835			0.532196	0.588012	0.579745	0.475163				0.545544	0.61038	0.613423	0.619458		0.0133484	0.0223687	0.0336781	0.144295		0.0126801	0.0215912	0.0301444	0.1012
SB 525334	Sell 159	134110	184410	220550	314580	52252	67063	71775	77478		-0.0403722	-0.0093527	-0.0952759	-0.422354			0.537677	0.598612	0.588002	0.476445				0.59465	0.632936	0.643557	0.649688		0.0569727	0.0343246	0.0555557	0.173243		0.0547619	0.0340065	0.050723	0.121801
Tie2 kinase inhibitor	Sell 160	127910	184050	211520	273060	45685	62568	65366	70694		0.00772496	-0.00738227	-0.0504319	-0.234624			0.55905	0.599395	0.60487	0.545546				0.645594	0.657539	0.675385	0.680361		0.0865434	0.058144	0.0705151	0.134815		0.0872172	0.0577179	0.0671296	0.109195
Torin 1	Sell 161	125190	175650	209230	309190	57249	73199	74245	83906		0.0288256	0.0385944	-0.0390595	-0.397983			0.568427	0.617679	0.609148	0.485415				0.555885	0.599351	0.631291	0.620624		-0.0125423	-0.0183274	0.0221431	0.135209		-0.0129146	-0.0190631	0.0213107	0.0967172
Vismodegib (GDC-0449)	Sell 162	117430	160650	181000	233810	47596	64580	64115	72472		0.0890246	0.120696	0.101134	-0.0571574			0.595179	0.650328	0.661883	0.61087				0.630769	0.646527	0.681598	0.672322		0.0355905	-0.00380114	0.0197148	0.0614523		0.0390685	-0.0043229	0.0219329	0.0581298
AZ 23	Sell 163	117470	163740	187850	253760	48243	65491	64554	74725		0.0887143	0.103783	0.067116	-0.14736			0.595041	0.643602	0.649087	0.577667				0.62575	0.64154	0.679418	0.662136		0.0307092	-0.00206171	0.0303308	0.0844683		0.0336988	-0.00230045	0.0325129	0.0736197
CD 437	Sell 164	128100	175820	205160	294990	46159	59340	60626	65922		0.00625101	0.0376639	-0.0188474	-0.333779			0.558395	0.617309	0.616751	0.509048				0.641917	0.675207	0.698925	0.701938		0.0835213	0.0578987	0.0821736	0.19289		0.0840467	0.0601647	0.0806535	0.144619
GSK837149A	Sell 165	127240	178980	208730	288310	53972	70059	73978	80559		0.0129226	0.020368	-0.0365764	-0.303576			0.56136	0.610431	0.610082	0.520166				0.581307	0.616538	0.632617	0.635757		0.0199464	0.00610723	0.022535	0.115592		0.0202076	0.00623421	0.0217399	0.0886729
PF 477736	Sell 166	127580	179760	202920	254460	84632	104480	111890	116140		0.010285	0.0160987	-0.00772334	-0.150525			0.560188	0.608733	0.620935	0.576502				0.343459	0.428137	0.444342	0.47488		-0.21673	-0.180595	-0.176594	-0.101622		-0.218982	-0.18355	-0.17524	-0.0883267
SB 265610	Sell 167	135670	181140	221780	316240	60065	72892	79633	84348		-0.052474	0.00854537	-0.101384	-0.42986			0.532299	0.605729	0.585704	0.473682				0.53404	0.601032	0.604534	0.618626		0.00174044	-0.00469748	0.0188297	0.144944		0.00165367	-0.00473797	0.0170964	0.101369
XL-184 free base (Cabozantinib)	Sell 168	127570	175670	212140	290800	58711	70763	76277	82321		0.0103625	0.038485	-0.0535109	-0.314834			0.560223	0.617635	0.603712	0.516022				0.544543	0.612685	0.6212	0.627791		-0.0156792	-0.00495062	0.017488	0.111769		-0.0158434	-0.00514877	0.0165997	0.0850062
Abiraterone (CB-7598)	Sell 169	133360	188200	246380	357960	66169	77900	82438	89583		-0.034554	-0.0300969	-0.223551	-0.618494			0.540262	0.590362	0.53975	0.404247				0.486687	0.573621	0.590604	0.594956		-0.0535753	-0.0167415	0.0508538	0.190709		-0.0517859	-0.0162524	0.0415625	0.117831
APO866 (FK866)	Sell 170	2144	3023	3606	4635	1200	1659	1937	2137		0.983368	0.983454	0.982092	0.979043			0.992609	0.99342	0.993264	0.992286				0.990691	0.99092	0.990381	0.990338		-0.00191802	-0.00250051	-0.00288317	-0.00194828		-0.115319	-0.151124	-0.161001	-0.0929663
BIRB 796 (Doramapimod)	Sell 171	113800	158690	188460	233930	42692	56526	60082	63990		0.117185	0.131424	0.0640866	-0.0577			0.607692	0.654594	0.647947	0.61067				0.668812	0.69061	0.701626	0.710673		0.0611199	0.0360156	0.0536788	0.100003		0.069233	0.0414651	0.0573544	0.0945475
BX-795	Sell 172	84861	132970	148600	175370	26459	38919	37879	35877		0.341682	0.2722	0.262036	0.207075			0.707455	0.710576	0.722408	0.708132				0.794742	0.78698	0.811889	0.837784		0.0872865	0.0764037	0.0894809	0.129653		0.13259	0.104979	0.121254	0.163512
Crizotinib (PF-02341066)	Sell 173	127830	177100	214200	311680	68792	78078	82241	86182		0.00834557	0.030658	-0.0637411	-0.409242			0.559326	0.614523	0.599864	0.481271				0.466339	0.572647	0.591582	0.610333		-0.0929873	-0.0418761	-0.00828171	0.129062		-0.0937699	-0.0432006	-0.00778545	0.0915829
DCC-2036 (Rebastinib)	Sell 174	136320	181380	219150	308560	72199	78582	83282	85537		-0.0575165	0.00723175	-0.0883233	-0.395135			0.530058	0.605207	0.590617	0.486464				0.439909	0.569888	0.586412	0.61325		-0.0901495	-0.0353188	-0.00420458	0.126786		-0.0852465	-0.0355761	-0.00386336	0.0908773
Estrone	Sell 175	141670	193730	223920	286460	67775	78683	83483	88300		-0.0990197	-0.0603649	-0.112012	-0.295211			0.511615	0.578326	0.581706	0.523245				0.474228	0.569335	0.585414	0.600757		-0.0373866	-0.00899054	0.00370783	0.0775124		-0.0340182	-0.00847872	0.00333434	0.0598454
Hydrocortisone (Cortisol)	Sell 176	140650	188120	240360	352400	61952	77136	81112	86739		-0.0911069	-0.0296591	-0.193655	-0.593355			0.515131	0.590536	0.550996	0.413501				0.519401	0.577803	0.597189	0.607815		0.00426961	-0.0127339	0.0461932	0.194314		0.0039131	-0.0123671	0.038699	0.121953
Itraconazole (Sporanox)	Sell 177	131450	170760	210890	293020	50270	65375	68558	73356		-0.019737	0.0653594	-0.0473032	-0.324872			0.546847	0.628322	0.606047	0.512327				0.610025	0.642175	0.659533	0.668325		0.0631784	0.013853	0.0534864	0.155999		0.0619556	0.0148217	0.0510705	0.117746
LY2109761	Sell 178	140220	182870	229880	328900	69563	76560	83542	97704		-0.0877711	-0.000923639	-0.14161	-0.487101			0.516614	0.601964	0.570573	0.452612				0.460358	0.580955	0.585121	0.558237		-0.0562559	-0.0210084	0.0145484	0.105626		-0.0517166	-0.0209891	0.0127438	0.0710279
MLN9708	Sell 179	131290	175540	215990	301180	59021	73881	79276	86391		-0.0184957	0.0391965	-0.0726304	-0.361767			0.547398	0.617918	0.59652	0.498746				0.542138	0.595619	0.606307	0.609388		-0.00525998	-0.0222997	0.00978662	0.110642		-0.00516446	-0.0232094	0.00912395	0.0812491
PAC-1	Sell 180	134760	179340	219210	305040	50555	64268	67315	73370		-0.0454146	0.0183975	-0.0886213	-0.379219			0.535436	0.609647	0.590505	0.492322				0.607814	0.648234	0.665706	0.668262		0.0723782	0.0385874	0.0752014	0.17594		0.0692339	0.0393106	0.0690795	0.127565
PF-562271	Sell 181	131910	174820	211700	286600	52641	66521	66325	74427		-0.0233055	0.0431374	-0.0513258	-0.295844			0.545261	0.619485	0.604534	0.523012				0.591632	0.635903	0.670623	0.663483		0.0463709	0.0164175	0.0660888	0.140471		0.0453148	0.0171576	0.0628623	0.108401
SB 203580	Sell 182	133020	179440	212340	284090	42777	58751	63607	71412		-0.0319164	0.0178502	-0.0545041	-0.284495			0.541435	0.609429	0.603338	0.527189				0.668153	0.678431	0.684121	0.677115		0.126718	0.0690019	0.0807822	0.149926		0.122799	0.0702559	0.0766069	0.11672
SGX-523	Sell 183	127250	170940	198000	271300	50229	66288	72904	80677		0.012845	0.0643742	0.0167099	-0.226666			0.561326	0.627931	0.630126	0.548475				0.610343	0.637178	0.637951	0.635224		0.0490176	0.00924756	0.00782447	0.0867485		0.0496554	0.00988382	0.00795744	0.0707189
Tamoxifen Citrate (Nolvadex)	Sell 184	121020	165690	185620	240450	51243	63750	66956	75973		0.0611748	0.0931097	0.0781904	-0.0871798			0.582803	0.639358	0.653253	0.599819				0.602477	0.65107	0.667489	0.656493		0.0196745	0.0117119	0.0142364	0.0566737		0.0209565	0.0129143	0.015444	0.0521291
Vinorelbine (Navelbine)	Sell 185	11949	15796	15669	16261	9323	9382	7952	6948		0.907304	0.913542	0.922186	0.926477			0.958808	0.965618	0.97073	0.972937				0.927676	0.948648	0.960509	0.968585		-0.0311318	-0.0169699	-0.01022	-0.00435177		-0.33585	-0.196279	-0.131339	-0.0591892
WYE-354	Sell 186	124060	164380	189420	244440	48434	61503	65042	74202		0.0375917	0.10028	0.0593192	-0.10522			0.572323	0.642209	0.646154	0.593179				0.624268	0.663368	0.676994	0.6645		0.0519455	0.0211593	0.0308402	0.0713217		0.0539745	0.0235177	0.0327849	0.0645317
Anagrelide	Sell 187	131290	174690	209260	288030	58362	70154	73921	80812		-0.0184957	0.0438489	-0.0392085	-0.30231			0.547398	0.619768	0.609092	0.520632				0.547251	0.616018	0.6329	0.634614		-0.000147717	-0.00375039	0.0238082	0.113982		-0.000145034	-0.00392238	0.0229099	0.0875228
FR 180204	Sell 188	125850	163610	190670	249830	52610	66681	69147	77075		0.0237056	0.104494	0.0531115	-0.129591			0.566152	0.643885	0.643819	0.584208				0.591872	0.635027	0.656608	0.65151		0.0257205	-0.00885803	0.0127893	0.0673022		0.026345	-0.00989165	0.0135067	0.0595811
JK 184	Sell 189	125130	170940	206210	273610	56891	72773	78590	84038		0.0292911	0.0643742	-0.0240618	-0.237111			0.568634	0.627931	0.614789	0.544631				0.558662	0.601683	0.609713	0.620027		-0.00997191	-0.0262475	-0.00507615	0.0753965		-0.0102728	-0.0280535	-0.00495688	0.0609456
NSC 663284	Sell 190	127210	166180	202100	273860	53646	67238	72919	79438		0.0131553	0.0904277	-0.00365113	-0.238241			0.561464	0.638291	0.622467	0.544215				0.583836	0.631978	0.637876	0.640826		0.022372	-0.00631284	0.015409	0.0966112		0.0226702	-0.00694045	0.0153529	0.0780229
SCH 79797	Sell 191	119250	154400	184700	230310	44084	54410	57232	63683		0.0749058	0.154905	0.0827592	-0.0413324			0.588904	0.663932	0.654971	0.616695				0.658014	0.702191	0.71578	0.712061		0.0691093	0.0382597	0.0608083	0.0953662		0.0747052	0.0452726	0.0662948	0.0915809
Regorafenib (BAY 73-4506)	Sell 192	125010	161180	181250	209290	47441	57088	56908	58991		0.030222	0.117795	0.0998923	0.0537082			0.569048	0.649174	0.661416	0.651679				0.631972	0.687534	0.717389	0.733276		0.0629238	0.0383593	0.0559726	0.0815972		0.0648847	0.0434811	0.0621843	0.0862284
control (no drug)	D12	148490	211770	225030	237630	62955	79663	83883	95036															Effect of 177Lu-lilotomab alone in each control well
"	F5	156730	229570	260570	316420	66644	84648	90683	96296															0.576032	0.623823	0.627236	0.600067
"	G7	140130	206180	226830	279290	67603	83808	86481	92932															0.574785	0.631276	0.651982	0.69567
"	G17	121740	174490	190350	231220	67654	83958	86604	92702															0.517569	0.59352	0.618741	0.667256
"	G21	105080	163680	181750	206940	50793	67009	68575	75924															0.444275	0.518838	0.545028	0.599074
"	H3	138030	201680	225310	263820	69028	83020	87332	91528															0.516625	0.59061	0.622696	0.633111
"	J14	109910	163940	183360	214260	47326	64038	67710	74254															0.499906	0.588358	0.612392	0.653066
"	K10	133360	181880	212450	265340	50433	63502	67843	73623															0.569411	0.609381	0.630726	0.65344
"																								0.621828	0.650858	0.680664	0.722533
"	C3	166600	238960	257620	269310	79242	96827	101090	108380
"	C4	167190	231100	250360	263960	86958	108070	113590	117830															0.524358	0.594798	0.6076	0.597564
"	C5	169290	234770	246740	280770	74946	97500	100240	108920															0.479885	0.532367	0.546293	0.553607
"	C6	166990	231370	247700	255780	72828	94560	98221	104650															0.557292	0.5847	0.593742	0.612067
"	C7	161300	224050	242780	259760	74327	92125	96722	104200															0.563878	0.591304	0.603468	0.590859
"	C8	163960	229080	248250	263950	64658	80074	81542	90223															0.5392	0.588819	0.601606	0.59886
"	C9	145690	241850	234120	249260	74223	93163	96245	102750															0.605648	0.650454	0.671533	0.658181
"	C10	172840	244070	269810	300610	59827	78089	80682	88858															0.490542	0.61479	0.588907	0.58778
"	C11	115230	177550	191740	205930	58689	78111	79883	85783															0.653859	0.680055	0.700967	0.704408
"	C12	124520	186990	200020	212340	54079	69043	69590	76539															0.49068	0.560062	0.583379	0.583436
"	C13	114770	179320	190180	201630	58204	78557	82683	89377															0.5657	0.630766	0.652085	0.639545
"	C14	132570	197420	210530	221740	60783	82862	82055	87019															0.492864	0.561917	0.565238	0.556728
"	C15	145400	212740	226710	238550	50594	68768	69111	75152															0.541503	0.580276	0.610246	0.607563
"	C16	132230	200610	213250	227790	67306	90828	93011	100850															0.652036	0.676751	0.695157	0.684963
"	C17	154950	221420	236450	248870	65230	85035	86663	91825															0.490993	0.547241	0.563841	0.557268
"	C18	137010	201450	216180	227820	58559	75501	74511	76900															0.579025	0.615956	0.633483	0.631032
"	C19	129730	196390	211630	224140	63111	81321	81577	87260															0.572593	0.625212	0.655329	0.662453
"	C20	112510	169360	183610	196320	62553	83422	84819	91781															0.51352	0.585921	0.61453	0.61069
"	C21	97190	151920	167130	178860	46702	65041	66422	70134															0.444023	0.507428	0.538048	0.532493
"	C22	75116	127450	141750	154600	44724	60303	59570	63748															0.519477	0.571873	0.602573	0.607883
"	N3	115580	149950	168780	200830	64765	71057	76833	80388															0.404601	0.52685	0.579753	0.587658
"	N4	125640	163410	184440	214150	65977	71998	79165	80990															0.439652	0.526129	0.544774	0.599721
"	N5	127080	162760	189380	228330	57813	63387	70368	76498															0.474873	0.559403	0.570782	0.621807
"	N6	132180	171650	199000	238440	55815	68070	74240	81201															0.545066	0.610549	0.62843	0.664967
"	N7	120440	164670	185510	222110	54958	65769	69881	75390															0.577735	0.603437	0.626935	0.659449
"	N8	130250	175400	200530	231270	58576	68288	73643	82476															0.54369	0.600601	0.623303	0.660574
"	N9	121210	162530	186000	220210	57022	66700	68641	74525															0.55028	0.610673	0.632758	0.643378
"	N10	117900	159500	181040	207670	47925	55717	59555	67522															0.52956	0.589614	0.630962	0.661573
"	N11	112060	150850	169920	191680	48581	60775	63715	70115															0.593511	0.650677	0.67104	0.674859
"	N12	107370	147370	166830	190440	44690	56774	60420	66124															0.566473	0.597116	0.625029	0.634208
"	N13	116490	155280	171090	193760	40430	52476	55657	60197															0.583776	0.614752	0.637835	0.652783
"	N14	114770	157650	177570	206400	41447	54939	59617	66773															0.652932	0.662056	0.674692	0.689322
"	N15	113310	161340	184550	214930	43317	57049	60223	64775															0.638869	0.651513	0.664262	0.676487
"	N16	123880	160780	197240	251390	51400	63454	69489	73266															0.617712	0.646405	0.673677	0.698623
"	N17	130740	172720	198480	235140	48516	59209	64775	69844															0.585082	0.605336	0.647693	0.708556
"	N18	121130	162600	187370	220910	44716	61242	66223	70774															0.628912	0.657197	0.673645	0.702968
"	N19	118960	160060	179530	208290	49813	65206	66368	68479															0.630843	0.623358	0.646566	0.679625
"	N20	108110	145990	163070	185990	44042	57331	59892	61644															0.581263	0.592615	0.630324	0.671232
"	N21	108250	138840	155350	176860	37855	53197	53109	54786															0.592619	0.607295	0.632722	0.668563
"	N22	83572	115250	127620	146900	31969	45938	46621	47445															0.6503	0.616847	0.658133	0.69023
																								0.617468	0.601406	0.634689	0.677025
	Mean controls	128906	182701	201365	221169	57283.5	72654.6	75745.3	81410.1
																							STDEV (177Lu-lilotomab alone):	0.0617159	0.0405287	0.0404713	0.046332
	Mean effect of Betalutin alone (F̅b)=1-(〖averageRLU〗_(177Lu-lilotomab)/〖averageRLU〗_control )					0.555618	0.602331	0.623841	0.631909														2xSTDEV (177Lu-lilotomab alone)	0.123432	0.0810575	0.0809426	0.092664

## Sheet: P1_100nM
P1_100nM		RAW DATA (RLU)
											Effect of drug alone (Fa) =1-(〖RLU〗_drug/〖averageRLU〗_control )						Expected value if additive effect (E) =Fa+F̅b-Fa*F̅b							Measured effect (M) =1-(〖RLU〗_combination/〖averageRLU〗_control )					Measured effect- Expected additive value (M-E)					Bliss score = (M-E)/(1-Fa)
		Minus_177Lu-lilotomab satetraxetan				Plus_177Lu-lilotomab satetraxetan											(Bliss Independence)
		Dy3	Dy4	Dy5	Dy6	Dy3	Dy4	Dy5	Dy6		Dy3	Dy4	Dy5	Dy6			Dy3	Dy4	Dy5	Dy6				Dy3	Dy4	Dy5	Dy6		Dy3	Dy4	Dy5	Dy6		Dy3	Dy4	Dy5	Dy6
ABT0737	Sell 1	1668	2486	2974	3108	961	1319	1538	1702		0.981463	0.981845	0.980535	0.980822			0.989058	0.991145	0.990801	0.991201				0.98932	0.990367	0.989934	0.989498		0.000262109	-0.000777197	-0.000867866	-0.0017033		0.0141399	-0.042809	-0.0445857	-0.0888166
Altretamine (Hexalen)	Sell 2	138980	195030	227420	274590	68452	93347	105050	108190		-0.544509	-0.424283	-0.488487	-0.694345			0.0883088	0.305289	0.296596	0.22263				0.239281	0.318297	0.312437	0.332419		0.150972	0.0130083	0.0158409	0.109788		0.0977477	0.00913325	0.0106423	0.0647969
Azacitidine (Vidaza)	Sell 3	120840	182430	198600	227830	68285	86296	97542	101380		-0.342916	-0.332266	-0.299857	-0.405815			0.207305	0.350171	0.385736	0.355009				0.241137	0.36979	0.361578	0.374439		0.033832	0.0196189	-0.024158	0.0194305		0.025193	0.0147259	-0.0185851	0.0138216
Capecitabine (Xeloda)	Sell 4	124300	245410	208920	232650	55986	73130	81790	83768		-0.381368	-0.792202	-0.367403	-0.435556			0.184608	0.125831	0.353816	0.341363				0.377818	0.46594	0.464676	0.483113		0.19321	0.340108	0.11086	0.14175		0.139869	0.189771	0.0810734	0.0987423
Chrysophanic acid (Chrysophanol)	Sell 5	95695	155470	167500	180670	46018	62545	67430	68984		-0.0634752	-0.13538	-0.0963046	-0.114816			0.372253	0.446204	0.481927	0.48852				0.488594	0.543241	0.558664	0.574337		0.116341	0.0970363	0.0767367	0.0858177		0.109397	0.0854659	0.0699958	0.0769793
Dacomitinib (PF299804, PF-00299804)	Sell 6	113450	178000	203360	218080	66387	86856	93706	98560		-0.26079	-0.299914	-0.331012	-0.345653			0.255782	0.365951	0.371013	0.382611				0.26223	0.3657	0.386685	0.39184		0.00644737	-0.000250721	0.0156716	0.00922879		0.00511376	-0.000192875	0.0117742	0.00685822
E7080 (Lenvatinib)	Sell 7	100130	163160	178500	197540	57212	76696	83409	87384		-0.112762	-0.19154	-0.168301	-0.218912			0.34316	0.418812	0.447904	0.44076				0.364193	0.439898	0.45408	0.460801		0.0210332	0.0210855	0.00617519	0.0200406		0.0189018	0.017696	0.00528562	0.0164414
Flavopiridol hydrochloride	Sell 8	44603	63921	76586	99693	34628	42514	45261	45402		0.504319	0.533192	0.498737	0.384849			0.70741	0.772309	0.763122	0.717767				0.615173	0.689525	0.703762	0.719849		-0.092237	-0.0827838	-0.0593595	0.00208188		-0.186081	-0.17734	-0.11842	0.00338433
JNJ-38877605	Sell 9	104080	171400	183830	198640	59214	82006	87411	92568		-0.156659	-0.251715	-0.203186	-0.225699			0.317248	0.389461	0.431419	0.437646				0.341944	0.401119	0.427886	0.428813		0.0246962	0.0116586	-0.00353276	-0.00883287		0.0213513	0.00931411	-0.00293617	-0.00720639
LDN193189	Sell 10	104980	171730	187000	196520	62385	81056	86919	91434		-0.166661	-0.254125	-0.223934	-0.212618			0.311344	0.388285	0.421614	0.443648				0.306705	0.408057	0.431106	0.435811		-0.00463983	0.0197718	0.00949215	-0.00783734		-0.00397702	0.0157654	0.00775544	-0.00646316
Mifepristone (Mifeprex)	Sell 11	103080	171510	191650	200140	54805	76962	84799	91362		-0.145546	-0.252519	-0.254369	-0.234955			0.323808	0.389069	0.407232	0.4334				0.390942	0.437955	0.444982	0.436255		0.0671343	0.0488862	0.0377501	0.00285523		0.0586046	0.0390303	0.0300949	0.00231201
Panobinostat	Sell 12	2114	3216	3787	4013	1174	1702	1850	2087		0.976507	0.976514	0.975214	0.975238			0.986132	0.988544	0.988287	0.988639				0.986953	0.98757	0.987892	0.987122		0.000820706	-0.00097389	-0.000395352	-0.00151686		0.0349337	-0.0414667	-0.0159504	-0.0612573
PD173074	Sell 13	122010	188960	210720	226580	54595	75767	84809	90945		-0.355918	-0.379954	-0.379184	-0.398102			0.19963	0.326911	0.348249	0.358548				0.393276	0.446682	0.444916	0.438828		0.193646	0.119771	0.0966676	0.0802805		0.142816	0.0867937	0.0700905	0.0574211
Pioglitazone (Actos)	Sell 14	125180	189140	209110	220250	52529	71801	76643	80125		-0.391147	-0.381269	-0.368646	-0.359043			0.178835	0.326269	0.353228	0.376468				0.416236	0.475645	0.498364	0.505592		0.237401	0.149376	0.145135	0.129124		0.170651	0.108144	0.106043	0.0950113
SNS-032 (BMS-387032)	Sell 15	137140	193260	241410	279160	65939	87773	95725	104820		-0.524061	-0.411357	-0.580053	-0.722544			0.100379	0.311594	0.253325	0.209693				0.267208	0.359003	0.37347	0.353213		0.166829	0.0474098	0.120145	0.14352		0.109464	0.0335916	0.0760383	0.0833189
S-Ruxolitinib	Sell 16	141040	198060	229040	256270	78381	105870	117840	123510		-0.567402	-0.44641	-0.49909	-0.581302			0.0747954	0.294496	0.291586	0.274495				0.128938	0.226843	0.228725	0.237887		0.0541429	-0.0676527	-0.0628604	-0.0366074		0.0345431	-0.0467728	-0.0419324	-0.0231502
Tofacitinib (CP-690550, Tasocitinib)	Sell 17	108860	162610	185970	199270	56965	78883	89864	97945		-0.20978	-0.187523	-0.217193	-0.229586			0.285892	0.420771	0.4248	0.435863				0.366938	0.423926	0.411831	0.395635		0.0810459	0.00315491	-0.0129689	-0.0402279		0.0669922	0.00265671	-0.0106548	-0.0327166
Vincristine	Sell 18	5576	6216	5833	5370	3992	4583	4073	3337		0.938033	0.954605	0.961822	0.966865			0.963422	0.977858	0.981959	0.984797				0.955636	0.966531	0.973342	0.979409		-0.00778594	-0.0113273	-0.00861689	-0.00538823		-0.125646	-0.249529	-0.225706	-0.162613
Cladribine	Sell 19	90375	104160	104040	99408	28519	26462	24044	19746		-0.00435312	0.239331	0.319048	0.386607			0.407151	0.628974	0.678207	0.718574				0.683063	0.806751	0.84263	0.878158		0.275912	0.177777	0.164422	0.159584		0.274716	0.233711	0.24146	0.260167
BML-266	Sell 20	159260	247420	289150	336420	60392	77030	86579	90767		-0.769884	-0.806881	-0.892516	-1.07586			-0.0447255	0.118672	0.105667	0.0475884				0.328853	0.437458	0.433332	0.439926		0.373579	0.318787	0.327665	0.392338		0.211075	0.176429	0.173137	0.189
GSK 269962	Sell 21	108160	169450	185630	201090	50517	66465	69241	69924		-0.202001	-0.237475	-0.214967	-0.240817			0.290484	0.396407	0.425851	0.43071				0.438596	0.514613	0.546811	0.568537		0.148112	0.118207	0.120959	0.137827		0.123221	0.0955226	0.0995575	0.111078
Marimastat	Sell 22	135690	203470	225560	259130	59369	77859	84181	87967		-0.507947	-0.485919	-0.476313	-0.59895			0.109891	0.275225	0.302349	0.266398				0.340222	0.431404	0.449027	0.457204		0.230331	0.156179	0.146678	0.190806		0.152745	0.105106	0.099354	0.119332
Pyroxamide	Sell 23	119970	178670	193230	211650	49133	67553	74739	79572		-0.333248	-0.304807	-0.26471	-0.305977			0.213012	0.363564	0.402345	0.400815				0.453976	0.506668	0.510826	0.509005		0.240964	0.143104	0.108481	0.10819		0.180735	0.109674	0.0857752	0.0828422
TCS PIM-1 4a	Sell 24	137110	205790	231300	256770	54844	74435	82754	89179		-0.523727	-0.502862	-0.513882	-0.584388			0.100576	0.266961	0.284595	0.273079				0.390509	0.456409	0.458367	0.449725		0.289933	0.189449	0.173771	0.176646		0.190279	0.126059	0.114785	0.111492
2-Methoxyestradiol	Sell 25	143390	209430	234370	264110	62285	82028	88252	90859		-0.593518	-0.529444	-0.533976	-0.629679			0.0593797	0.253995	0.2751	0.252299				0.307816	0.400959	0.422382	0.439359		0.248436	0.146964	0.147282	0.187059		0.155904	0.0960895	0.096013	0.114783
AZ 3146	Sell 26	137110	212640	236030	269090	58028	77789	83635	84413		-0.523727	-0.552887	-0.54484	-0.660408			0.100576	0.242561	0.269966	0.238201				0.355125	0.431915	0.4526	0.479133		0.254549	0.189355	0.182635	0.240933		0.167057	0.121937	0.118222	0.145104
AZD8055	Sell 27	34423	53587	64981	85634	22573	32492	36366	41513		0.617451	0.60866	0.574693	0.471599			0.774189	0.809119	0.799016	0.757568				0.749142	0.762714	0.761981	0.743846		-0.0250471	-0.0464047	-0.0370347	-0.0137225		-0.0654744	-0.118579	-0.0870776	-0.0259699
BMS 794833	Sell 28	137080	199720	226520	258990	57246	78033	87912	92379		-0.523394	-0.458533	-0.482597	-0.598086			0.100773	0.288583	0.29938	0.266794				0.363815	0.430134	0.424607	0.42998		0.263043	0.141551	0.125227	0.163185		0.172669	0.0970502	0.0844647	0.102113
Cyt387	Sell 29	123960	188530	216330	252790	58769	77490	84533	89860		-0.377589	-0.376814	-0.415902	-0.559829			0.186838	0.328442	0.330897	0.284347				0.34689	0.434099	0.446723	0.445523		0.160052	0.105657	0.115826	0.161176		0.116183	0.0767401	0.0818034	0.10333
DAPT (GSI-IX)	Sell 30	116880	177010	198130	219020	59318	78596	86067	89919		-0.298908	-0.292685	-0.296781	-0.351453			0.233282	0.369477	0.387189	0.37995				0.340789	0.426022	0.436683	0.445159		0.107507	0.0565447	0.0494934	0.0652088		0.0827671	0.0437421	0.0381663	0.0482509
Enzastaurin (LY317615)	Sell 31	114550	180610	203020	229180	57912	77353	85161	91393		-0.273014	-0.318975	-0.328787	-0.414145			0.248566	0.356654	0.372065	0.351187				0.356414	0.4351	0.442613	0.436064		0.107847	0.0784457	0.0705479	0.0848768		0.0847181	0.0594747	0.0530919	0.0600198
Formestane	Sell 32	118990	178900	207810	234160	49749	67359	71868	75656		-0.322357	-0.306487	-0.360138	-0.444874			0.219441	0.362745	0.357249	0.337088				0.447131	0.508085	0.529617	0.533168		0.22769	0.14534	0.172367	0.19608		0.172185	0.111245	0.126728	0.135707
Iniparib (BSI-201)	Sell 33	123980	185100	213180	238340	50737	69153	74017	77360		-0.377811	-0.351765	-0.395285	-0.470666			0.186707	0.34066	0.34064	0.325255				0.436151	0.494983	0.515551	0.522654		0.249444	0.154323	0.174911	0.197399		0.181044	0.114164	0.125359	0.134224
Linsitinib (OSI-906)	Sell 34	122000	178980	203040	221240	64541	82168	89063	93974		-0.355807	-0.307071	-0.328918	-0.365151			0.199695	0.36246	0.372003	0.373665				0.282745	0.399936	0.417074	0.420138		0.0830492	0.0374761	0.0450707	0.0464725		0.0612544	0.0286718	0.0339154	0.034042
MK-2206 dihydrochloride	Sell 35	103340	165640	188810	205530	57348	76222	83022	89240		-0.148435	-0.209651	-0.235781	-0.268213			0.322103	0.409978	0.416016	0.418141				0.362682	0.443359	0.456613	0.449349		0.040579	0.033381	0.0405967	0.0312081		0.0353342	0.0275956	0.0328511	0.0246079
Olaparib (AZD2281)	Sell 36	110460	169600	190930	199530	54934	70958	75556	75660		-0.227561	-0.23857	-0.249656	-0.231191			0.275396	0.395872	0.409459	0.435127				0.389509	0.481802	0.505478	0.533143		0.114113	0.0859292	0.0960195	0.0980168		0.0929587	0.0693777	0.0768367	0.0796114
PF 573228	Sell 37	98704	154240	180380	197420	71433	92040	99044	100020		-0.0969148	-0.126398	-0.180606	-0.218171			0.352514	0.450586	0.44209	0.4411				0.206153	0.327842	0.351747	0.382831		-0.146362	-0.122744	-0.0903427	-0.0582689		-0.13343	-0.10897	-0.0765223	-0.0478331
Quizartinib (AC220)	Sell 38	120530	179020	209170	236660	65705	86583	95129	98680		-0.339471	-0.307363	-0.369039	-0.4603			0.209338	0.362318	0.353043	0.330011				0.269809	0.367694	0.377371	0.3911		0.0604705	0.00537628	0.0243281	0.0610887		0.045145	0.00411231	0.0177702	0.041833
SB590885	Sell 39	160930	226070	251130	261770	90847	93772	95106	90535		-0.788443	-0.650964	-0.643672	-0.61524			-0.0556805	0.194722	0.223262	0.258924				-0.00959854	0.315193	0.377522	0.441358		0.0460819	0.120471	0.15426	0.182434		0.0257665	0.0729703	0.0938507	0.112945
Tipifarnib (Zarnestra)	Sell 40	91806	153960	193570	245770	46575	65618	74660	75128		-0.0202561	-0.124353	-0.266935	-0.516513			0.397764	0.451583	0.401293	0.30422				0.482404	0.520799	0.511343	0.536426		0.0846397	0.0692158	0.110049	0.232206		0.0829592	0.0615606	0.0868627	0.153118
Torin 2	Sell 41	20758	26867	29377	35469	14535	17235	18186	18279		0.769313	0.803793	0.807725	0.78114			0.86383	0.904298	0.909138	0.899587				0.83847	0.874135	0.880971	0.88721		-0.0253601	-0.0301631	-0.028167	-0.0123763		-0.109933	-0.153731	-0.146493	-0.056549
Vorinostat (SAHA)	Sell 42	101820	163290	183250	208330	42929	57777	63270	66249		-0.131543	-0.192489	-0.19939	-0.285491			0.332074	0.418349	0.433213	0.410214				0.522923	0.578061	0.585891	0.591214		0.190849	0.159712	0.152679	0.181		0.168662	0.133932	0.127297	0.140802
Banoxantrone dihydrochloride	Sell 43	120440	193100	237940	276340	49863	61430	65523	66768		-0.338471	-0.410188	-0.557342	-0.705143			0.209929	0.312164	0.264058	0.217676				0.445864	0.551383	0.571145	0.588011		0.235935	0.23922	0.307087	0.370335		0.176272	0.169637	0.197187	0.217187
CDIBA	Sell 44	130320	199060	238950	284850	63311	80755	88772	91620		-0.448269	-0.453713	-0.563952	-0.757654			0.145117	0.290934	0.260934	0.193584				0.296414	0.410255	0.418978	0.434663		0.151297	0.119321	0.158044	0.241079		0.104467	0.0820805	0.101054	0.137159
GW 9508	Sell 45	113330	178830	206340	250660	51074	64800	68422	71150		-0.259456	-0.305976	-0.350516	-0.546686			0.25657	0.362994	0.361796	0.290377				0.432406	0.526773	0.552171	0.560972		0.175836	0.163778	0.190375	0.270596		0.139613	0.125407	0.140965	0.174952
Necrostatin-1	Sell 46	120540	186450	215180	253180	56888	71730	80013	84857		-0.339582	-0.361624	-0.408375	-0.562236			0.209273	0.335851	0.334454	0.283242				0.367794	0.476164	0.476307	0.476394		0.158521	0.140312	0.141853	0.193151		0.118336	0.103048	0.100721	0.123638
QNZ	Sell 47	68713	95095	87180	71308	50804	64449	64337	55277		0.23638	0.305532	0.429398	0.559997			0.549251	0.661265	0.730355	0.798126				0.435406	0.529336	0.578908	0.658916		-0.113845	-0.131929	-0.151447	-0.13921		-0.149086	-0.189971	-0.265416	-0.316384
TTP 22	Sell 48	119920	182170	210260	247850	57118	77265	84101	85525		-0.332692	-0.330368	-0.376173	-0.529347			0.21334	0.351097	0.349672	0.298332				0.365238	0.435742	0.44955	0.472272		0.151898	0.0846451	0.0998788	0.17394		0.113978	0.0636254	0.0725772	0.113735
ABT-751	Sell 49	121770	186830	214770	256150	52556	68255	74832	80973		-0.353251	-0.364399	-0.405692	-0.580562			0.201204	0.334498	0.335722	0.274834				0.415936	0.501541	0.510217	0.50036		0.214732	0.167043	0.174495	0.225525		0.158678	0.12243	0.124134	0.142687
AMG 900	Sell 50	108940	165440	174920	164100	45319	61349	63952	52492		-0.210669	-0.20819	-0.144869	-0.0125716			0.285367	0.410691	0.458977	0.53543				0.496362	0.551975	0.581428	0.676101		0.210995	0.141284	0.12245	0.140671		0.174279	0.116939	0.106956	0.138924
Azathioprine (Azasan, Imuran)	Sell 51	105140	167650	192290	216670	50004	66000	73152	76255		-0.168439	-0.22433	-0.258558	-0.336952			0.310295	0.402818	0.405252	0.386603				0.444297	0.518009	0.521213	0.529472		0.134002	0.115191	0.11596	0.142869		0.114685	0.0940849	0.0921375	0.106862
Carboplatin	Sell 52	100840	159400	180540	199180	42503	61099	66396	69798		-0.120652	-0.164081	-0.181653	-0.229031			0.338502	0.432205	0.441595	0.436117				0.527657	0.553801	0.565431	0.569315		0.189154	0.121595	0.123837	0.133197		0.16879	0.104456	0.1048	0.108376
Cisplatin	Sell 53	84094	147940	166750	178990	48323	64896	69716	69665		0.0654487	-0.0803896	-0.0913958	-0.10445			0.448354	0.473027	0.484247	0.493276				0.462978	0.526072	0.543702	0.570135		0.0146241	0.0530448	0.0594549	0.0768595		0.0156483	0.0490979	0.054476	0.0695908
Dalcetrapib??JTT-705??	Sell 54	93348	157430	178170	190880	56801	74475	82125	84985		-0.0373926	-0.149694	-0.166141	-0.177816			0.387649	0.439223	0.448925	0.459615				0.368761	0.456117	0.462483	0.475604		-0.0188883	0.0168945	0.0135584	0.015989		-0.0182075	0.0146948	0.0116267	0.0135751
Elesclomol	Sell 55	2120	3261	3772	4263	1126	1620	1913	1995		0.97644	0.976185	0.975312	0.973695			0.986093	0.988384	0.988333	0.987931				0.987487	0.988169	0.987479	0.98769		0.0013935	-0.00021476	-0.000854088	-0.00024142		0.059147	-0.00901795	-0.0345951	-0.00917783
Fluvastatin sodium (Lescol)	Sell 56	114240	179490	211580	244450	43526	66954	71817	76898		-0.269569	-0.310796	-0.384813	-0.508368			0.2506	0.360643	0.345589	0.307957				0.516288	0.511042	0.52995	0.525504		0.265688	0.150399	0.184362	0.217547		0.209274	0.114739	0.133131	0.144227
IC-87114	Sell 57	81945	137430	162210	178900	56241	75344	80621	84481		0.0893309	-0.00363623	-0.061681	-0.103894			0.462451	0.510464	0.498289	0.493531				0.374984	0.449771	0.472327	0.478714		-0.0874672	-0.0606932	-0.0259616	-0.0148167		-0.0960472	-0.0604733	-0.0244533	-0.0134222
Lenalidomide	Sell 58	99060	156240	180750	198760	51505	71022	76599	79681		-0.100871	-0.141004	-0.183027	-0.22644			0.350179	0.443462	0.440945	0.437307				0.427616	0.481334	0.498652	0.508332		0.077437	0.0378725	0.0577065	0.0710255		0.0703416	0.0331923	0.0487787	0.0579119
Mitoxantrone Hydrochloride	Sell 59	38907	24707	19452	15531	23762	10926	8162	6202		0.56762	0.819567	0.872685	0.904167			0.744775	0.911992	0.939835	0.956031				0.735929	0.920209	0.946579	0.961731		-0.00884624	0.00821678	0.00674338	0.00569941		-0.0204594	0.0455393	0.052966	0.0594721
Nutlin-3	Sell 60	140970	204280	230830	273870	60430	72987	79539	81712		-0.566624	-0.491834	-0.510806	-0.689902			0.0752546	0.27234	0.286049	0.224669				0.328431	0.466984	0.479409	0.4958		0.253176	0.194644	0.19336	0.271131		0.161606	0.130473	0.127985	0.160442
Pelitinib (EKB-569)	Sell 61	140230	206730	248620	293170	73588	86519	95971	96424		-0.5584	-0.509727	-0.627243	-0.808992			0.0801089	0.263612	0.231025	0.17003				0.182204	0.368161	0.37186	0.40502		0.102095	0.104549	0.140835	0.23499		0.0655126	0.0692501	0.0865481	0.129901
Ponatinib (AP24534)	Sell 62	36913	53827	61124	76178	27951	33950	35133	34362		0.589779	0.606907	0.599937	0.529947			0.757855	0.808264	0.810945	0.784339				0.689376	0.752067	0.770051	0.787971		-0.0684797	-0.0561974	-0.0408942	0.00363226		-0.166934	-0.142962	-0.102219	0.00772735
SB 216763	Sell 63	133880	190700	212150	240060	48173	66818	76020	82360		-0.487832	-0.392661	-0.388543	-0.481279			0.121764	0.320713	0.343826	0.320385				0.464645	0.512035	0.502441	0.491801		0.342881	0.191323	0.158615	0.171416		0.230457	0.137379	0.114232	0.115722
SU11274	Sell 64	118480	178730	196540	217560	52872	65957	72138	77315		-0.316689	-0.305246	-0.286374	-0.342444			0.222786	0.363351	0.392107	0.384083				0.412424	0.518323	0.527849	0.522931		0.189638	0.154973	0.135742	0.138848		0.144026	0.118731	0.105523	0.103429
Topotecan HCl	Sell 65	28009	26258	22930	19044	16697	15987	13745	11232		0.688731	0.808241	0.849921	0.88249			0.816264	0.906467	0.929078	0.946086				0.814443	0.883249	0.910038	0.930693		-0.00182117	-0.0232184	-0.0190406	-0.0153926		-0.00585079	-0.121081	-0.12687	-0.13099
Y-27632 2HCl	Sell 66	127190	187000	213740	246610	59467	75084	82034	86005		-0.413485	-0.365641	-0.39895	-0.521696			0.16565	0.333892	0.338908	0.301842				0.339133	0.45167	0.463079	0.46931		0.173483	0.117778	0.124171	0.167468		0.122734	0.0862435	0.0887602	0.110053
VX-680 (MK-0457, Tozasertib)	Sell 67	102130	154080	155330	134030	48764	61985	58676	44300		-0.134988	-0.125229	-0.0166507	0.172974			0.33004	0.451156	0.519569	0.620558				0.458077	0.54733	0.61596	0.726649		0.128037	0.0961747	0.096391	0.10609		0.112809	0.0854712	0.0948123	0.128279
CGS 9343B	Sell 68	117570	178460	201560	222650	43144	59105	61120	63379		-0.306576	-0.303274	-0.319231	-0.373852			0.228756	0.364312	0.37658	0.369673				0.520533	0.568363	0.599963	0.608923		0.291778	0.20405	0.223383	0.239249		0.223315	0.156568	0.169328	0.174145
GSK 3787	Sell 69	126810	182720	206840	236350	52582	68051	73813	77607		-0.409262	-0.334384	-0.353789	-0.458387			0.168142	0.349138	0.36025	0.330888				0.415647	0.503031	0.516886	0.52113		0.247505	0.153893	0.156637	0.190241		0.175627	0.115329	0.115703	0.130446
MG 149	Sell 70	105830	159380	181230	201170	40963	53806	58065	60860		-0.176107	-0.163935	-0.186169	-0.24131			0.305769	0.432277	0.439461	0.430484				0.544771	0.607061	0.619959	0.624466		0.239002	0.174784	0.180498	0.193982		0.203215	0.150166	0.152169	0.156272
S-(+)-Niguldipine hydrochloride	Sell 71	120210	175740	196850	215370	42527	61294	66331	70930		-0.335915	-0.28341	-0.288403	-0.328931			0.211438	0.374001	0.391148	0.390283				0.52739	0.552377	0.565857	0.56233		0.315952	0.178375	0.174709	0.172046		0.236506	0.138986	0.135601	0.129462
U 73122	Sell 72	123670	176810	201800	234000	44805	59344	65512	68080		-0.374366	-0.291224	-0.320802	-0.443886			0.18874	0.37019	0.375838	0.337541				0.502074	0.566617	0.571217	0.579915		0.313334	0.196428	0.195379	0.242374		0.227984	0.152125	0.147925	0.167862
3-Methyladenine	Sell 73	121100	171020	194950	216840	43469	59533	65770	71346		-0.345805	-0.24894	-0.275968	-0.338001			0.205599	0.390814	0.397025	0.386122				0.516921	0.565237	0.569529	0.559763		0.311322	0.174423	0.172504	0.173641		0.231328	0.139657	0.135194	0.129776
AZ628	Sell 74	121130	170440	195370	216940	51074	62064	66584	70875		-0.346139	-0.244705	-0.278717	-0.338618			0.205402	0.39288	0.395726	0.385839				0.432406	0.546753	0.564201	0.562669		0.227003	0.153873	0.168475	0.17683		0.168633	0.123622	0.131753	0.132099
Bafetinib (INNO-406)	Sell 75	115070	166090	187220	206570	54752	67991	74435	75284		-0.278793	-0.212937	-0.225374	-0.274631			0.245155	0.408375	0.420934	0.415196				0.391531	0.503469	0.512815	0.535464		0.146376	0.095094	0.0918817	0.120267		0.114464	0.0783998	0.0749825	0.0943546
Bortezomib (Velcade)	Sell 76	2024	3073	3374	3863	993	1451	1673	1685		0.977507	0.977558	0.977917	0.976164			0.986723	0.989054	0.989564	0.989064				0.988965	0.989404	0.98905	0.989603		0.0022418	0.000349759	-0.000514266	0.000539013		0.0996664	0.0155852	-0.0232877	0.022613
Cytarabine	Sell 77	110800	131280	140680	158330	31057	31425	31619	30771		-0.23134	0.0412765	0.079235	0.023032			0.273166	0.532371	0.564881	0.551765				0.654858	0.770507	0.79305	0.810129		0.381692	0.238136	0.22817	0.258364		0.309981	0.248388	0.247805	0.264455
Dasatinib (BMS-354825)	Sell 78	19866	23760	22017	21611	14600	15103	15143	14589		0.779226	0.826483	0.855896	0.86665			0.869682	0.915365	0.931902	0.938819				0.837748	0.889704	0.900888	0.909979		-0.0319339	-0.0256607	-0.0310145	-0.0288396		-0.144645	-0.147886	-0.215224	-0.21627
Epirubicin Hydrochloride	Sell 79	50786	38537	23246	14657	10193	9548	7725	5390		0.435606	0.718569	0.847853	0.90956			0.66685	0.862728	0.928101	0.958506				0.886723	0.930272	0.949439	0.966741		0.219873	0.0675436	0.0213383	0.00823551		0.389574	0.24	0.140248	0.0910601
GDC-0879	Sell 80	125050	165350	178840	200260	50778	61427	63367	64498		-0.389702	-0.207533	-0.170526	-0.235695			0.179688	0.411011	0.446853	0.43306				0.435695	0.551405	0.585257	0.602018		0.256007	0.140394	0.138404	0.168958		0.184217	0.116265	0.118241	0.136731
INK 128	Sell 81	25512	39929	46017	59900	16571	21958	25156	26985		0.716481	0.708403	0.698814	0.63039			0.832645	0.85777	0.857671	0.830422				0.815844	0.839643	0.835351	0.83349		-0.0168009	-0.0181268	-0.0223193	0.00306837		-0.0592584	-0.0621639	-0.0741046	0.00830163
Lomustine (CeeNU)	Sell 82	118150	168690	191530	228120	55534	70401	78205	80885		-0.313022	-0.231925	-0.253583	-0.407604			0.224951	0.399114	0.407603	0.354188				0.382841	0.485869	0.48814	0.500903		0.15789	0.0867554	0.0805373	0.146715		0.120249	0.0704227	0.0642457	0.10423
NPI-2358 (Plinabulin)	Sell 83	5338	6423	6261	6005	4033	4556	4292	3876		0.940678	0.953094	0.959021	0.962946			0.964983	0.977121	0.980635	0.983				0.955181	0.966728	0.971908	0.976083		-0.00980283	-0.0103928	-0.00872648	-0.00691641		-0.165247	-0.221564	-0.212951	-0.18666
OSI-930	Sell 84	128290	183570	211780	253180	81688	95025	102410	104470		-0.425709	-0.340592	-0.386122	-0.562236			0.158434	0.34611	0.34497	0.283242				0.092187	0.306043	0.329716	0.355373		-0.0662468	-0.0400673	-0.0152542	0.0721302		-0.0464658	-0.0298878	-0.0110049	0.0461711
PF-04217903	Sell 85	118670	174950	198440	227240	55469	72013	81510	87506		-0.3188	-0.277641	-0.29881	-0.402174			0.22154	0.376815	0.38623	0.356679				0.383563	0.474097	0.466509	0.460048		0.162024	0.0972818	0.0802782	0.103369		0.122857	0.0761417	0.0618091	0.0737206
R406(free base)	Sell 86	123080	182570	206730	237000	47587	59759	64063	68829		-0.367809	-0.333289	-0.353069	-0.462398			0.192611	0.349672	0.36059	0.329048				0.471157	0.563587	0.580701	0.575294		0.278547	0.213914	0.220111	0.246245		0.203644	0.160441	0.162676	0.168385
SB939 (Pracinostat)	Sell 87	43788	77357	88899	104900	16493	20477	20149	20128		0.513376	0.43507	0.418147	0.352719			0.712756	0.724449	0.725038	0.703026				0.81671	0.850459	0.868123	0.875801		0.103954	0.12601	0.143085	0.172775		0.213623	0.223054	0.245912	0.266924
TAK-733	Sell 88	98672	147470	177340	217520	37925	56461	68739	81656		-0.0965591	-0.0769573	-0.160708	-0.342197			0.352724	0.474701	0.451492	0.384197				0.578533	0.587672	0.550096	0.496145		0.225809	0.112971	0.098604	0.111949		0.205925	0.104898	0.0849516	0.0834071
Tosedostat (CHR2797)	Sell 89	108710	165910	186520	210720	39704	55985	60810	64134		-0.208113	-0.211623	-0.220792	-0.300238			0.286876	0.409016	0.423099	0.403448				0.558763	0.591148	0.601992	0.604264		0.271886	0.182131	0.178894	0.200817		0.22505	0.15032	0.146539	0.154446
WAY-362450	Sell 90	104510	151510	175000	199940	40876	55459	59866	65352		-0.161438	-0.106461	-0.145393	-0.233721			0.314428	0.46031	0.45873	0.433966				0.545738	0.594989	0.608171	0.596748		0.23131	0.134679	0.149441	0.162783		0.199159	0.12172	0.130472	0.131944
1,4-PB-ITU dihydrobromide	Sell 91	110170	161000	184280	209640	41226	57035	60755	63121		-0.224338	-0.175765	-0.206131	-0.293574			0.277299	0.426506	0.430027	0.406505				0.541848	0.58348	0.602352	0.610515		0.26455	0.156974	0.172325	0.20401		0.216076	0.133508	0.142874	0.15771
CGP 3466B	Sell 92	100870	148270	169850	184490	38447	52478	55871	59992		-0.120986	-0.0827996	-0.111686	-0.138387			0.338306	0.471851	0.474659	0.477705				0.572732	0.616759	0.634319	0.629822		0.234426	0.144908	0.15966	0.152117		0.209125	0.133827	0.14362	0.133625
HLI 373	Sell 93	97611	142670	164860	184230	39342	55924	61002	64205		-0.0847681	-0.0419034	-0.0790256	-0.136783			0.359684	0.491799	0.490093	0.478441				0.562785	0.591593	0.600736	0.603826		0.203101	0.0997942	0.110643	0.125385		0.18723	0.0957807	0.10254	0.110298
NF??B Activation Inhibitor III	Sell 94	95936	143540	165380	184690	35541	47248	50531	52035		-0.0661535	-0.0482569	-0.082429	-0.139621			0.370672	0.4887	0.488484	0.477139				0.605027	0.654953	0.669269	0.67892		0.234355	0.166253	0.180785	0.201781		0.219813	0.1586	0.167018	0.17706
SA4503	Sell 95	145040	205550	274600	293160	88484	118240	134540	135760		-0.611855	-0.501109	-0.797285	-0.80893			0.0485559	0.267816	0.15067	0.170058				0.0166619	0.136506	0.119422	0.162299		-0.031894	-0.13131	-0.0312478	-0.00775916		-0.0197872	-0.087475	-0.0173861	-0.00428936
UNC 0224	Sell 96	141060	205870	233470	276410	61546	74976	83611	86054		-0.567624	-0.503446	-0.528085	-0.705575			0.0746642	0.266676	0.277884	0.217478				0.316029	0.452458	0.452757	0.469008		0.241364	0.185783	0.174874	0.25153		0.153968	0.123571	0.11444	0.147475
(-)-Epigallocatechin gallate	Sell 97	142840	195840	219990	250450	57348	74829	81046	85323		-0.587406	-0.430198	-0.439857	-0.54539			0.0629876	0.302403	0.319577	0.290971				0.362682	0.453532	0.469546	0.473518		0.299694	0.151129	0.149969	0.182547		0.188795	0.10567	0.104155	0.118124
Aminoglutethimide (Cytadren)	Sell 98	141990	203240	232000	273600	69614	85480	94868	95892		-0.57796	-0.484239	-0.518464	-0.688236			0.0685635	0.276044	0.28243	0.225433				0.226367	0.375749	0.379079	0.408303		0.157804	0.0997048	0.0966489	0.18287		0.100005	0.0671757	0.0636491	0.10832
AZD6244 (Selumetinib)	Sell 99	118180	169620	201580	248180	65092	87826	104530	112330		-0.313355	-0.238716	-0.319362	-0.531383			0.224754	0.395801	0.376519	0.297398				0.276621	0.358616	0.31584	0.306873		0.0518671	-0.0371847	-0.0606781	0.00947532		0.0394921	-0.0300187	-0.0459905	0.00618743
Bleomycin sulfate	Sell 100	128850	183750	203770	219990	52812	63638	66477	69062		-0.431933	-0.341906	-0.333695	-0.357438			0.15476	0.345469	0.369745	0.377204				0.413091	0.535259	0.564901	0.573856		0.258331	0.18979	0.195156	0.196652		0.180407	0.141433	0.146327	0.14487
Clofarabine	Sell 101	55457	43176	33424	28082	11540	10582	8653	6589		0.383697	0.68469	0.781237	0.826721			0.636209	0.846204	0.89662	0.920499				0.871754	0.922721	0.943365	0.959343		0.235545	0.0765169	0.0467448	0.0388436		0.38219	0.242672	0.213677	0.224168
Danusertib (PHA-739358)	Sell 102	77530	128190	130170	115010	43736	52660	48107	36268		0.138396	0.0638425	0.148024	0.290336			0.491413	0.543378	0.597388	0.674404				0.513954	0.61543	0.685135	0.77621		0.0225412	0.072052	0.087747	0.101806		0.0261619	0.0769657	0.102992	0.143456
Exemestane	Sell 103	112170	167510	184910	198960	46528	64637	71372	74068		-0.246565	-0.223307	-0.210255	-0.227674			0.264179	0.403317	0.428078	0.43674				0.482926	0.527963	0.532863	0.542967		0.218747	0.124646	0.104785	0.106226		0.17548	0.101893	0.0865806	0.0865266
Fludarabine (Fludara)	Sell 104	113710	166060	181320	199070	44591	61242	65241	67321		-0.263679	-0.212718	-0.186758	-0.228352			0.254077	0.408482	0.439182	0.436429				0.504452	0.552756	0.572991	0.584599		0.250376	0.144274	0.133809	0.14817		0.198132	0.118968	0.112752	0.120625
Idarubicin HCl	Sell 105	19708	23943	22735	19036	15172	15083	13230	9891		0.780982	0.825147	0.851197	0.882539			0.870718	0.914713	0.929681	0.946109				0.831391	0.889851	0.913408	0.938968		-0.0393271	-0.0248628	-0.016273	-0.00714067		-0.179561	-0.142192	-0.109359	-0.060792
MDV3100 (Enzalutamide)	Sell 106	95684	156490	174760	196160	43310	60893	68363	71962		-0.063353	-0.142829	-0.143822	-0.210396			0.372325	0.442571	0.459472	0.444667				0.518688	0.555305	0.552557	0.555962		0.146363	0.112734	0.0930851	0.111295		0.137643	0.0986447	0.0813807	0.0919489
MK-0752	Sell 107	106750	164300	180160	194780	49266	65449	69872	71992		-0.186331	-0.199865	-0.179166	-0.201881			0.299733	0.414751	0.44277	0.448574				0.452498	0.522033	0.542681	0.555777		0.152765	0.107282	0.0999106	0.107203		0.128771	0.0894116	0.0847299	0.0891957
NVP-BSK805	Sell 108	122240	178760	196640	217380	38640	56254	61109	66177		-0.358474	-0.305465	-0.287029	-0.341333			0.198121	0.363244	0.391798	0.384593				0.570587	0.589183	0.600035	0.591658		0.372466	0.22594	0.208238	0.207065		0.27418	0.173072	0.161797	0.154372
PI-103	Sell 109	21420	41707	50868	67207	14655	23084	26384	28505		0.761956	0.695418	0.667064	0.585302			0.859488	0.851437	0.842667	0.809736				0.837136	0.83142	0.827314	0.824111		-0.0223511	-0.0200165	-0.0153526	0.0143755		-0.0938946	-0.065718	-0.0461129	0.0346651
Procarbazine hydrochloride (Matulane)	Sell 110	106520	159790	174480	192690	45544	61242	66817	72297		-0.183775	-0.166929	-0.141989	-0.188985			0.301242	0.430816	0.460338	0.454491				0.493862	0.552756	0.562676	0.553895		0.192619	0.12194	0.102338	0.0994038		0.162716	0.104497	0.0896136	0.083604
SB 431542	Sell 111	109830	164180	182510	201740	50530	65616	72058	77814		-0.22056	-0.198989	-0.194547	-0.244827			0.279529	0.415179	0.435502	0.42887				0.438451	0.520814	0.528373	0.519852		0.158922	0.105635	0.0928715	0.0909822		0.130204	0.0881033	0.0777462	0.0730882
SB 743921	Sell 112	7352	8434	7649	6900	4226	3689	3154	3057		0.918296	0.938407	0.949937	0.957424			0.951772	0.969957	0.976342	0.980466				0.953036	0.97306	0.979357	0.981137		0.00126392	0.00310217	0.0030149	0.000670957		0.0154695	0.0503659	0.0602214	0.015759
Toremifene Citrate (Fareston, Acapodene)	Sell 113	84304	130370	152410	166340	27350	39555	43793	45454		0.063115	0.0479222	0.00246096	-0.0263934			0.446976	0.535612	0.5286	0.529088				0.696055	0.711134	0.71337	0.719528		0.249078	0.175522	0.18477	0.19044		0.265858	0.184356	0.185226	0.185543
YM155	Sell 114	1841	2885	3130	3361	1234	1460	1655	1725		0.979541	0.978931	0.979514	0.979261			0.987923	0.989723	0.990319	0.990485				0.986286	0.989338	0.989168	0.989356		-0.00163693	-0.000385637	-0.00115114	-0.00112898		-0.0800089	-0.0183037	-0.0561911	-0.0544376
Adrucil (Fluorouracil)	Sell 115	144010	202730	228070	262400	54175	70851	77399	79098		-0.600408	-0.480515	-0.492741	-0.619127			0.0553126	0.277861	0.294586	0.25714				0.397944	0.482583	0.493416	0.511929		0.342631	0.204722	0.19883	0.254789		0.21409	0.138278	0.133198	0.157362
CCT 018159	Sell 116	140630	196290	223070	264040	57288	73645	80562	84244		-0.562846	-0.433484	-0.460016	-0.629247			0.077485	0.300801	0.310051	0.252498				0.363348	0.462179	0.472713	0.480176		0.285864	0.161378	0.162663	0.227679		0.182912	0.112578	0.111412	0.139745
GSK 650394	Sell 117	136330	187770	208400	232270	59114	72413	78190	79433		-0.515059	-0.371264	-0.363999	-0.433211			0.105692	0.331149	0.355424	0.342439				0.343056	0.471176	0.488238	0.509862		0.237363	0.140026	0.132814	0.167423		0.156669	0.102115	0.097371	0.116817
Pentostatin	Sell 118	128400	180920	200830	224860	54071	70082	76323	78949		-0.426932	-0.321239	-0.314453	-0.387488			0.157712	0.35555	0.378838	0.363417				0.3991	0.488199	0.500458	0.512849		0.241387	0.132649	0.12162	0.149432		0.169165	0.100398	0.0925251	0.1077
SMER 3	Sell 119	141350	203730	237370	296810	79516	97471	105350	108300		-0.570847	-0.487818	-0.553611	-0.831453			0.0727619	0.274299	0.265821	0.159725				0.116325	0.28818	0.310473	0.33174		0.043563	0.0138813	0.0446524	0.172015		0.0277322	0.00932994	0.028741	0.0939226
VER 155008	Sell 120	122970	181530	202080	226130	47543	62610	67710	72763		-0.366587	-0.325694	-0.322634	-0.395325			0.193332	0.353377	0.374972	0.359822				0.471646	0.542766	0.556831	0.551019		0.278314	0.189389	0.181859	0.191198		0.203656	0.142861	0.137498	0.137027
A-769662	Sell 121	129610	185750	208810	225290	53774	70147	78361	82578		-0.440379	-0.356512	-0.366683	-0.390142			0.149775	0.338345	0.354156	0.3622				0.4024	0.487724	0.487119	0.490456		0.252625	0.149379	0.132963	0.128257		0.175388	0.11012	0.0972888	0.0922616
Andarine (GTX-007)	Sell 122	110580	166960	184920	196890	53609	68400	74694	75632		-0.228895	-0.219291	-0.21032	-0.214901			0.274609	0.405276	0.428047	0.442601				0.404234	0.500482	0.51112	0.533316		0.129625	0.0952061	0.0830726	0.0907157		0.105481	0.0780832	0.0686369	0.0746692
Barasertib (AZD1152-HQPA)	Sell 123	115960	167830	172950	153720	62046	87149	90654	74687		-0.288684	-0.225644	-0.131975	0.0514778			0.239317	0.402177	0.46507	0.564816				0.310472	0.36356	0.40666	0.539147		0.0711549	-0.0386168	-0.0584101	-0.0256684		0.0552152	-0.0315073	-0.0516001	-0.0270614
Bosutinib (SKI-606)	Sell 124	123950	185480	214870	259050	66357	87598	94991	96711		-0.377478	-0.35454	-0.406346	-0.598456			0.186904	0.339307	0.335413	0.266624				0.262563	0.360281	0.378274	0.403249		0.0756594	0.0209748	0.0428612	0.136625		0.0549261	0.0154848	0.030477	0.085473
Crenolanib (CP-868596)	Sell 125	112520	164580	184720	203190	49593	70521	81604	87033		-0.250454	-0.20191	-0.209011	-0.253775			0.261883	0.413754	0.428666	0.424765				0.448864	0.484993	0.465893	0.462967		0.186981	0.071239	0.0372274	0.0382017		0.149531	0.0592715	0.0307916	0.0304694
Daunorubicin HCl (Daunomycin HCl)	Sell 126	38790	35172	21790	13783	11737	11582	9214	6549		0.56892	0.743143	0.857382	0.914953			0.745542	0.874715	0.932604	0.96098				0.869565	0.915418	0.939693	0.95959		0.124022	0.0407032	0.0070893	-0.00139036		0.287701	0.158466	0.0497084	-0.0163481
Erlotinib HCl	Sell 127	30987	49069	61092	87588	18766	25955	32328	44707		0.655636	0.641654	0.600147	0.459542			0.796729	0.825213	0.811044	0.752037				0.79145	0.810453	0.78841	0.724137		-0.00527902	-0.0147591	-0.0226342	-0.0278992		-0.0153298	-0.0411868	-0.0566062	-0.0516213
GW3965 HCl	Sell 128	29968	66755	74097	77218	12610	19394	19234	17315		0.66696	0.512496	0.515028	0.52353			0.803414	0.762214	0.77082	0.781394				0.859863	0.858368	0.874112	0.893159		0.0564492	0.096154	0.103292	0.111764		0.169497	0.197237	0.212984	0.234567
Ispinesib (SB-715992)	Sell 129	7358	9484	9390	9302	5405	5198	4448	3452		0.918229	0.930739	0.938541	0.942602			0.951732	0.966217	0.970957	0.973666				0.939933	0.96204	0.970887	0.9787		-0.0117992	-0.00417772	-6.96011e-05	0.00503374		-0.144296	-0.0603188	-0.00113249	0.0876995
Lonidamine	Sell 130	127660	178130	203550	223780	62152	75811	82586	89212		-0.418708	-0.300864	-0.332256	-0.380824			0.162567	0.365488	0.370425	0.366474				0.309294	0.446361	0.459466	0.449521		0.146727	0.0808728	0.0890408	0.083047		0.103423	0.0621685	0.0668346	0.0601431
NU7441(KU-57788)	Sell 131	122610	169960	192670	231710	49778	68660	72951	76254		-0.362586	-0.241199	-0.261045	-0.429756			0.195694	0.39459	0.404077	0.344024				0.446808	0.498584	0.522528	0.529478		0.251115	0.103994	0.118451	0.185454		0.184293	0.0837848	0.0939311	0.12971
Oxaliplatin (Eloxatin)	Sell 132	105390	148770	171350	187190	49182	66246	71227	76069		-0.171217	-0.086451	-0.121503	-0.155047			0.308655	0.47007	0.470019	0.470061				0.453432	0.516213	0.533812	0.53062		0.144777	0.0461424	0.0637929	0.0605583		0.123612	0.0424708	0.0568816	0.0524293
PF-3845	Sell 133	90326	133860	147820	166190	40159	59376	63652	65646		-0.00380858	0.0224351	0.032503	-0.0254678			0.407473	0.523181	0.542797	0.529513				0.553706	0.566384	0.583391	0.594934		0.146233	0.0432028	0.0405944	0.0654215		0.145678	0.0441943	0.0419581	0.0637967
Saracatinib (AZD0530)	Sell 134	136740	194230	217350	251860	48735	63601	68946	73852		-0.519615	-0.41844	-0.422578	-0.554091			0.103003	0.308138	0.327742	0.286979				0.458399	0.535529	0.548741	0.5443		0.355397	0.22739	0.220999	0.25732		0.233873	0.16031	0.155351	0.165576
SGI-1776 free base	Sell 135	130740	187180	206450	233110	62803	76495	84729	87219		-0.452936	-0.366955	-0.351236	-0.438395			0.142362	0.333251	0.361456	0.340061				0.302059	0.441365	0.44544	0.461819		0.159697	0.108114	0.0839842	0.121758		0.109913	0.0790914	0.0621536	0.0846486
TAME	Sell 136	127540	183300	199140	219080	60072	75660	81838	82190		-0.417374	-0.33862	-0.303392	-0.351823			0.163354	0.347072	0.384065	0.37978				0.332409	0.447463	0.464362	0.49285		0.169056	0.100391	0.0802965	0.11307		0.119274	0.0749962	0.0616058	0.0836427
TPCA-1	Sell 137	130100	175670	196310	233950	66664	80709	89674	91677		-0.445824	-0.282899	-0.284869	-0.443578			0.14656	0.374251	0.392819	0.337683				0.259151	0.410591	0.413074	0.434311		0.112591	0.0363405	0.020256	0.0966283		0.0778732	0.0283269	0.015765	0.0669367
WP1130	Sell 138	130890	179350	202060	245350	58451	75652	81665	84621		-0.454603	-0.309773	-0.322503	-0.513921			0.141378	0.361142	0.375034	0.305409				0.350424	0.447522	0.465494	0.47785		0.209046	0.0863797	0.0904603	0.172441		0.143713	0.0659501	0.0684008	0.113903
4-Phenylbutyrate	Sell 139	126030	174920	199880	240300	52269	68533	75352	79204		-0.400593	-0.277422	-0.308235	-0.48276			0.173259	0.376922	0.381777	0.319706				0.419125	0.499511	0.506813	0.511275		0.245866	0.122589	0.125037	0.191569		0.175544	0.0959659	0.0955767	0.129198
Fenretinide	Sell 140	124870	178320	204310	236800	50850	67892	73243	74404		-0.387702	-0.302251	-0.33723	-0.461164			0.180869	0.364811	0.368075	0.329615				0.434895	0.504192	0.520617	0.540894		0.254027	0.139381	0.152542	0.211279		0.183056	0.107031	0.114073	0.144596
ITX 3	Sell 141	109750	154430	176080	203810	46297	68190	74622	74974		-0.219671	-0.127785	-0.152462	-0.2576			0.280054	0.449909	0.455389	0.42301				0.485493	0.502016	0.511591	0.537376		0.20544	0.052107	0.056202	0.114366		0.168438	0.0462029	0.0487669	0.0909402
NSC 23766	Sell 142	117840	164220	190880	225370	45951	63322	68995	73768		-0.309576	-0.199281	-0.249329	-0.390635			0.226984	0.415036	0.409613	0.361973				0.489339	0.537566	0.548421	0.544818		0.262354	0.12253	0.138807	0.182845		0.200335	0.10217	0.111105	0.131483
SR 33805	Sell 143	123930	171160	199910	250360	46767	63537	70038	73876		-0.377256	-0.249963	-0.308431	-0.544835			0.187035	0.390315	0.381684	0.291226				0.48027	0.535996	0.541594	0.544152		0.293235	0.145681	0.15991	0.252926		0.212913	0.116548	0.122215	0.163723
Lapatinib Ditosylate (Tykerb)	Sell 144	115420	161400	180780	209160	55922	71903	78386	83282		-0.282683	-0.178687	-0.183224	-0.290612			0.242859	0.425081	0.440852	0.407864				0.378529	0.4749	0.486956	0.486112		0.13567	0.049819	0.0461032	0.0782483		0.10577	0.0422665	0.0389641	0.0606288
17-DMAG HCl (Alvespimycin)	Sell 145	7053	6405	5969	6460	3642	2711	2698	2174		0.921619	0.953225	0.960932	0.960139			0.953733	0.977185	0.981538	0.981712				0.959526	0.980202	0.982341	0.986585		0.00579261	0.00301695	0.000803268	0.00487382		0.073903	0.0644991	0.0205609	0.12227
Amuvatinib (MP-470)	Sell 146	85486	128480	141890	153290	32289	49076	51784	52379		0.0499792	0.0617246	0.0713154	0.054131			0.439223	0.542345	0.561138	0.566033				0.641167	0.641603	0.661068	0.676798		0.201944	0.0992586	0.0999303	0.110765		0.212568	0.105788	0.107604	0.117104
AZD7762	Sell 147	82674	128400	151020	184710	77507	114840	125550	132000		0.0812294	0.0623089	0.0115587	-0.139745			0.457669	0.54263	0.532899	0.477082				0.138651	0.161336	0.178262	0.1855		-0.319018	-0.381294	-0.354637	-0.291582		-0.347222	-0.40663	-0.358784	-0.255831
BMS 777607	Sell 148	92531	135150	152810	172050	49942	66803	72940	78772		-0.0283131	0.0130144	-0.000157082	-0.0616267			0.393008	0.518586	0.527363	0.512923				0.444986	0.512145	0.5226	0.513941		0.0519775	-0.00644072	-0.0047626	0.0010179		0.0505464	-0.00652565	-0.00476185	0.000958815
Coenzyme Q10(CoQ10)	Sell 149	103820	143400	160820	179870	40176	55739	58957	60048		-0.15377	-0.0472345	-0.0525834	-0.10988			0.318954	0.489199	0.502588	0.490784				0.553517	0.592944	0.61412	0.629477		0.234563	0.103746	0.111532	0.138692		0.203302	0.0990662	0.105961	0.124961
Dapagliflozin	Sell 150	104280	143130	167970	188210	43470	58338	65339	69366		-0.158882	-0.0452627	-0.0993808	-0.161341			0.315936	0.49016	0.480473	0.467174				0.51691	0.573964	0.57235	0.57198		0.200974	0.0838036	0.0918762	0.104806		0.173421	0.0801747	0.0835708	0.0902461
Ezetimibe (Zetia)	Sell 151	105290	146250	167830	196030	53440	71291	78085	81930		-0.170106	-0.0680477	-0.0984645	-0.209594			0.309311	0.479047	0.480906	0.445035				0.406112	0.47937	0.488926	0.494455		0.0968011	0.000322927	0.0080193	0.0494195		0.0827285	0.000302352	0.00730046	0.0408562
Flutamide (Eulexin)	Sell 152	93945	133750	148840	164700	41913	60013	61218	60534		-0.0440272	0.0232384	0.025827	-0.0162738			0.383733	0.523573	0.539642	0.533731				0.534214	0.561732	0.599322	0.626478		0.150481	0.038159	0.05968	0.0927467		0.144135	0.0390669	0.0612622	0.0912615
Imatinib (Gleevec)	Sell 153	136170	179490	196880	237290	62929	76109	82125	83775		-0.513281	-0.310796	-0.2886	-0.464187			0.106742	0.360643	0.391056	0.328227				0.300659	0.444184	0.462483	0.48307		0.193917	0.0835409	0.0714279	0.154843		0.128143	0.063733	0.0554307	0.105753
Medroxyprogesterone acetate	Sell 154	135640	174270	206320	262300	68836	83724	90346	92789		-0.507391	-0.272675	-0.350386	-0.61851			0.110219	0.379237	0.361858	0.257424				0.235014	0.388573	0.408676	0.42745		0.124795	0.0093354	0.0468183	0.170026		0.0827886	0.00733526	0.0346703	0.105051
MK-1775	Sell 155	135690	185400	221510	293880	92842	118750	129550	126100		-0.507947	-0.353956	-0.449806	-0.813373			0.109891	0.339592	0.314876	0.16802				-0.0317693	0.132782	0.152082	0.221906		-0.14166	-0.20681	-0.162794	0.0538858		-0.0939424	-0.152745	-0.112287	0.0297158
Obatoclax mesylate (GX15-070)	Sell 156	129980	170870	200030	259230	71901	80671	89796	91489		-0.44449	-0.247845	-0.309217	-0.599567			0.147348	0.391348	0.381313	0.266115				0.200952	0.410869	0.412276	0.435471		0.053604	0.0195201	0.0309633	0.169357		0.0371093	0.015643	0.0236503	0.105876
PIK-75	Sell 157	44387	54918	63460	74787	20278	19937	20205	18056		0.50672	0.59894	0.584648	0.53853			0.708827	0.804378	0.80372	0.788277				0.774647	0.854402	0.867756	0.888586		0.0658202	0.0500242	0.0640363	0.10031		0.133434	0.12473	0.154173	0.21737
Quercetin (Sophoretin)	Sell 158	134460	177430	207330	272760	58856	72774	79400	79767		-0.494277	-0.295752	-0.356996	-0.683053			0.117959	0.367981	0.358734	0.227811				0.345923	0.468539	0.480319	0.507801		0.227964	0.100558	0.121585	0.27999		0.152558	0.0776061	0.0895986	0.166359
SB 525334	Sell 159	127610	175210	201710	252690	61587	78270	86430	89547		-0.418152	-0.279539	-0.320213	-0.559212			0.162895	0.375889	0.376116	0.28463				0.315573	0.428403	0.434307	0.447454		0.152678	0.0525137	0.0581903	0.162825		0.10766	0.0410411	0.0440765	0.104428
Tie2 kinase inhibitor	Sell 160	122230	168280	190310	227170	49962	66611	73401	74542		-0.358363	-0.22893	-0.245598	-0.401742			0.198187	0.400574	0.411376	0.356877				0.444764	0.513547	0.519583	0.540042		0.246577	0.112973	0.108207	0.183165		0.181525	0.0919279	0.0868712	0.130669
Torin 1	Sell 161	53189	86306	108690	145160	36405	54183	66492	75968		0.408901	0.369717	0.288613	0.104297			0.651087	0.692572	0.663825	0.589049				0.595425	0.604307	0.564803	0.531243		-0.055662	-0.0882642	-0.0990217	-0.0578063		-0.094167	-0.140039	-0.139195	-0.0645373
Vismodegib (GDC-0449)	Sell 162	112770	158870	181250	210570	41539	59142	62524	63491		-0.253233	-0.16021	-0.1863	-0.299313			0.260243	0.434093	0.439399	0.403872				0.53837	0.568092	0.590774	0.608232		0.278127	0.133999	0.151375	0.204359		0.221928	0.115496	0.127603	0.157283
AZ 23	Sell 163	116120	161360	185580	215720	46179	60653	65702	69117		-0.290462	-0.178394	-0.21464	-0.33109			0.238267	0.425224	0.426006	0.389292				0.486805	0.557058	0.569974	0.573517		0.248537	0.131834	0.143968	0.184224		0.192596	0.111876	0.118527	0.138401
CD 437	Sell 164	115600	154360	180380	219270	53647	66830	73636	76807		-0.284683	-0.127274	-0.180606	-0.352996			0.241679	0.450158	0.44209	0.379242				0.403812	0.511948	0.518045	0.526066		0.162133	0.0617895	0.0759553	0.146824		0.126205	0.0548132	0.0643359	0.108517
GSK837149A	Sell 165	115580	155750	178180	207630	45697	63927	70083	73748		-0.284461	-0.137425	-0.166206	-0.281171			0.24181	0.445207	0.448894	0.412195				0.492161	0.533148	0.5413	0.544941		0.250351	0.0879411	0.0924055	0.132746		0.194908	0.077316	0.079236	0.103613
PF 477736	Sell 166	117170	169890	189260	212860	73385	98987	108840	110320		-0.302131	-0.240688	-0.238726	-0.313443			0.23138	0.394839	0.414624	0.397389				0.18446	0.277109	0.287631	0.319275		-0.0469199	-0.117731	-0.126993	-0.0781137		-0.0360332	-0.0948913	-0.102519	-0.0594725
SB 265610	Sell 167	124440	164020	193180	245230	48364	64633	69690	74169		-0.382923	-0.19782	-0.264383	-0.513181			0.183689	0.415749	0.4025	0.305749				0.462522	0.527992	0.543872	0.542344		0.278833	0.112244	0.141372	0.236595		0.201626	0.0937066	0.111811	0.156356
XL-184 free base (Cabozantinib)	Sell 168	110930	150160	168700	198330	49950	65663	71984	75802		-0.232784	-0.096602	-0.104159	-0.223786			0.272313	0.465119	0.478216	0.438524				0.444897	0.52047	0.528857	0.532267		0.172584	0.0553513	0.0506419	0.0937434		0.139995	0.0504753	0.0458647	0.0766011
Abiraterone (CB-7598)	Sell 169	123510	174470	210960	278770	62513	80824	90531	93135		-0.372588	-0.274135	-0.380755	-0.720138			0.18979	0.378525	0.347506	0.210797				0.305282	0.409751	0.407465	0.425315		0.115492	0.0312262	0.0599589	0.214518		0.0841419	0.0245078	0.0434247	0.12471
APO866 (FK866)	Sell 170	1692	2409	2801	3274	902	1382	1433	1533		0.981197	0.982407	0.981667	0.979798			0.988901	0.991419	0.991337	0.990731				0.989976	0.989907	0.990621	0.990541		0.00107522	-0.00151156	-0.000715715	-0.000190548		0.0571821	-0.0859198	-0.0390401	-0.00943211
BIRB 796 (Doramapimod)	Sell 171	90521	125580	147450	177520	53337	64831	73197	76413		-0.00597565	0.082903	0.0349247	-0.0953791			0.406194	0.552675	0.543941	0.497437				0.407257	0.526546	0.520918	0.528497		0.00106295	-0.0261285	-0.023023	0.0310597		0.00105664	-0.0284904	-0.0238562	0.0283552
BX-795	Sell 172	59472	93548	99916	103790	40734	60511	60673	58353		0.339077	0.316829	0.34604	0.359569			0.609871	0.666775	0.690963	0.706168				0.547316	0.558095	0.602889	0.639935		-0.0625552	-0.10868	-0.0880735	-0.066233		-0.0946483	-0.159082	-0.134677	-0.103419
Crizotinib (PF-02341066)	Sell 173	125770	165840	195620	262490	53514	65317	71472	74064		-0.397704	-0.211111	-0.280353	-0.619683			0.174965	0.409266	0.394953	0.256886				0.40529	0.522997	0.532208	0.542991		0.230325	0.113731	0.137256	0.286106		0.164788	0.0939067	0.107202	0.176643
DCC-2036 (Rebastinib)	Sell 174	128490	164690	188070	227700	46267	53878	57132	59418		-0.427932	-0.202713	-0.230937	-0.405012			0.157122	0.413362	0.418305	0.355377				0.485827	0.606535	0.626065	0.633364		0.328705	0.193173	0.207761	0.277987		0.230197	0.160614	0.168782	0.197854
Estrone	Sell 175	130000	173730	202170	249900	65641	78080	84518	85142		-0.444713	-0.268731	-0.323223	-0.541997			0.147216	0.381161	0.374694	0.292528				0.27052	0.42979	0.446821	0.474635		0.123304	0.0486294	0.0721273	0.182107		0.0853483	0.0383292	0.0545088	0.118098
Hydrocortisone (Cortisol)	Sell 176	136310	177590	209800	275070	80931	95381	104400	105770		-0.514837	-0.29692	-0.373162	-0.697307			0.105824	0.367411	0.351094	0.221271				0.1006	0.303443	0.316691	0.347351		-0.00522392	-0.0639683	-0.034403	0.12608		-0.0034485	-0.0493232	-0.0250538	0.0742822
Itraconazole (Sporanox)	Sell 177	93314	134710	151960	176420	53347	65397	70055	71477		-0.0370147	0.0162276	0.00540625	-0.0885916			0.387872	0.520153	0.529992	0.500552				0.407145	0.522413	0.541483	0.558954		0.0192735	0.00225983	0.011491	0.0584029		0.0185856	0.00229711	0.0115535	0.05365
LY2109761	Sell 178	132500	171480	198570	246590	68617	80416	85713	87747		-0.472496	-0.2523	-0.299661	-0.521572			0.130817	0.389176	0.385828	0.301899				0.237447	0.412731	0.439	0.458561		0.106631	0.0235552	0.0531712	0.156662		0.0724149	0.0188095	0.0409116	0.102961
MLN9708	Sell 179	61319	82096	97954	127990	32431	40914	46148	57544		0.318551	0.400462	0.358881	0.210244			0.597755	0.707568	0.697031	0.637658				0.639589	0.70121	0.697957	0.644927		0.0418335	-0.00635845	0.00092567	0.00726958		0.0613891	-0.0106056	0.00144383	0.00920484
PAC-1	Sell 180	107540	149830	165380	191330	54734	69493	78239	79562		-0.195111	-0.0941921	-0.082429	-0.180593			0.294551	0.466294	0.488484	0.458341				0.391732	0.4925	0.487918	0.509066		0.0971803	0.0262057	-0.000566429	0.0507253		0.0813149	0.0239499	-0.000523295	0.042966
PF-562271	Sell 181	96507	135450	151410	168010	48755	59608	66290	69895		-0.0724991	0.0108235	0.00900606	-0.036698			0.366926	0.517517	0.531693	0.52436				0.458177	0.564689	0.566125	0.568716		0.0912509	0.0471722	0.0344322	0.0443557		0.0850825	0.0476884	0.0347451	0.0427856
SB 203580	Sell 182	101470	142910	165510	198820	61033	76554	86830	89051		-0.127654	-0.0436561	-0.0832799	-0.22681			0.33437	0.490944	0.488082	0.437137				0.32173	0.440935	0.431689	0.450515		-0.01264	-0.0500095	-0.0563933	0.0133782		-0.0112091	-0.0479176	-0.0520579	0.0109049
SGX-523	Sell 183	93287	133880	152760	171960	48805	63198	67004	67478		-0.0367147	0.022289	0.000170173	-0.0610713			0.388049	0.52311	0.527517	0.513178				0.457622	0.538472	0.561452	0.58363		0.0695725	0.0153624	0.0339345	0.0704522		0.0671086	0.0157126	0.0339403	0.0663973
Tamoxifen Citrate (Nolvadex)	Sell 184	40426	84810	99058	109850	19773	30128	32359	32123		0.550739	0.380642	0.351655	0.322176			0.734811	0.697901	0.693616	0.689012				0.780259	0.779979	0.788207	0.801786		0.0454487	0.082078	0.0945907	0.112774		0.101163	0.132521	0.145896	0.166376
Vinorelbine (Navelbine)	Sell 185	4558	4974	4825	4504	2929	2972	2688	2169		0.949346	0.963675	0.96842	0.972208			0.9701	0.982282	0.985076	0.987249				0.96745	0.978296	0.982407	0.986616		-0.00265058	-0.00398644	-0.00266964	-0.000632803		-0.0523274	-0.109745	-0.0845355	-0.0227695
WYE-354	Sell 186	85617	134460	147750	161360	47908	63394	68710	70843		0.0485234	0.0180534	0.0329611	0.00433548			0.438363	0.521044	0.543013	0.543187				0.46759	0.537041	0.550286	0.562866		0.0292268	0.015997	0.00727274	0.0196798		0.0307173	0.0162911	0.00752063	0.0197655
Anagrelide	Sell 187	94782	134330	150400	167350	41358	53166	57349	59821		-0.0533289	0.0190027	0.0156166	-0.0326255			0.378242	0.521507	0.534817	0.526229				0.540381	0.611735	0.624645	0.630877		0.162139	0.0902279	0.089828	0.104648		0.15393	0.0919757	0.0912531	0.101342
FR 180204	Sell 188	95747	134650	152580	176260	57887	71256	77408	81817		-0.0640531	0.0166658	0.00134829	-0.0876043			0.371912	0.520367	0.528074	0.501004				0.356692	0.479625	0.493357	0.495152		-0.0152201	-0.0407415	-0.0347175	-0.00585254		-0.0143039	-0.041432	-0.0347644	-0.00538113
JK 184	Sell 189	6233	7189	7491	7845	4930	4740	4528	4359		0.930732	0.9475	0.950971	0.951593			0.959112	0.974392	0.976831	0.977791				0.945212	0.965384	0.970364	0.973103		-0.0139003	-0.00900795	-0.00646676	-0.00468766		-0.200672	-0.171578	-0.131896	-0.0968381
NSC 663284	Sell 190	80805	117860	134470	146950	36847	51983	57109	59875		0.102	0.139281	0.11988	0.0932517			0.469929	0.580174	0.584088	0.583982				0.590513	0.620374	0.626216	0.630544		0.120583	0.0401999	0.0421278	0.0465624		0.13428	0.046705	0.047866	0.051351
SCH 79797	Sell 191	32449	70334	77815	90184	19162	30418	32687	32619		0.639389	0.486359	0.490693	0.443524			0.787139	0.749465	0.75932	0.744687				0.787049	0.777861	0.78606	0.798726		-8.93032e-05	0.0283956	0.0267399	0.0540386		-0.000247644	0.0552829	0.0525025	0.0971086
Regorafenib (BAY 73-4506)	Sell 192	73020	101000	106590	114550	48283	57415	56637	57771		0.188516	0.262408	0.302358	0.293174			0.520998	0.640231	0.67032	0.675707				0.463423	0.580705	0.629305	0.643527		-0.0575754	-0.059526	-0.041015	-0.03218		-0.0709508	-0.0807032	-0.0587909	-0.0455275
control (no drug)	D12	111480	150760	166710	177460	48490	65576	70108	74197															Effect of 177Lu-lilotomab alone in each control well
"	F5	121580	184980	208990	248720	63796	77506	85905	87440															0.565034	0.565031	0.579461	0.581895
"	G7	116550	166280	182690	192910	54505	67138	73136	74934															0.475276	0.581003	0.588952	0.64844
"	G17	120090	167580	185410	202750	51856	67374	74434	80940															0.532347	0.596235	0.599672	0.61156
"	G21	97848	142650	160400	171270	36301	49349	53366	57691															0.568191	0.597959	0.598544	0.600789
"	H3	110210	164730	180030	188670	61901	71670	76927	78605															0.629006	0.654055	0.667294	0.663158
"	J14	116040	159840	174170	186340	47691	59204	62807	65417															0.438336	0.564924	0.572699	0.583373
"	K10	118360	159240	177460	192500	59089	73395	78964	79873															0.589012	0.629605	0.639393	0.648937
"																								0.500769	0.539092	0.555032	0.585075
"	C3	93340	155620	170130	177030	59020	73214	78355	79347
"	C4	104640	166140	179450	187900	62328	79428	84855	87217															0.367688	0.529533	0.53944	0.551788
"	C5	118810	179140	190180	201320	57961	76660	84195	88661															0.404358	0.521921	0.527138	0.535833
"	C6	90983	151390	162570	174160	71666	89765	97702	99369															0.512154	0.572067	0.557288	0.559602
"	C7	97668	157580	170010	182970	63799	80953	88874	91165															0.212314	0.407061	0.399016	0.429438
"	C8	106440	162770	177390	191630	65220	78542	86246	89273															0.346777	0.486274	0.477243	0.501749
"	C9	57321	107720	122420	132150	60258	75692	80854	83728															0.38726	0.517466	0.513806	0.534139
"	C10	59046	124960	141610	149360	47645	61592	64065	67162															-0.0512378	0.297326	0.339536	0.366417
"	C11	50939	110110	125570	135110	47987	64022	68249	71632															0.193087	0.507106	0.547596	0.550335
"	C12	80977	138750	154570	162450	58049	72566	77879	80071															0.0579517	0.418563	0.456486	0.469825
"	C13	50998	110560	128330	136130	53618	67413	73026	78544															0.283142	0.477002	0.496157	0.507104
"	C14	54497	112860	133120	140010	48466	64695	67841	72014															-0.0513746	0.390259	0.430951	0.423022
"	C15	69661	127000	147130	152190	48236	59991	61180	66836															0.110667	0.426768	0.490377	0.485651
"	C16	88229	145420	169950	174170	40463	53785	54525	56570															0.307561	0.52763	0.584177	0.560838
"	C17	97919	151670	175430	183240	52875	68523	73285	77856															0.541387	0.63014	0.67917	0.675202
"	C18	95052	154000	179470	186860	60857	77553	86492	88851															0.460013	0.54821	0.582255	0.575115
"	C19	80625	131480	153720	162940	49522	64185	68832	71561															0.35975	0.496409	0.51807	0.524505
"	C20	67486	116850	140740	151620	45723	62177	66898	69775															0.385774	0.511827	0.552225	0.560814
"	C21	62095	106080	125380	136390	45615	60797	64632	65417															0.322482	0.46789	0.52467	0.539803
"	C22	56299	100210	119300	128780	45950	58881	62837	62519															0.2654	0.426876	0.484511	0.520368
"	N3	114320	145980	154280	170360	44854	54443	57409	60449															0.183822	0.412424	0.473286	0.514529
"	N4	109410	142280	153560	168790	57278	64251	68612	69232															0.607645	0.627052	0.627891	0.645169
"	N5	110330	145860	158650	177820	58037	68504	74034	74477															0.476483	0.548419	0.553191	0.589834
"	N6	116080	152960	163190	181420	58603	72242	77250	79058															0.473969	0.530344	0.53335	0.581166
"	N7	117160	153650	162820	180870	62040	75288	79691	82784															0.49515	0.527707	0.526625	0.564227
"	N8	123210	164400	176900	194640	64308	73420	80143	80296															0.470468	0.510003	0.510558	0.542301
"	N9	96889	137320	150850	172880	60692	71639	77576	78767															0.478062	0.553406	0.546959	0.587464
"	N10	87867	133430	146500	165470	49428	66271	73213	74114															0.373592	0.478306	0.485741	0.544383
"	N11	96006	138160	151880	168340	50981	65763	73641	72542															0.437468	0.503328	0.500253	0.5521
"	N12	81036	121330	137730	157040	47847	62534	67713	69079															0.468981	0.524008	0.515137	0.569074
"	N13	90434	125740	147040	164580	47432	61690	66716	66848															0.409559	0.484596	0.508364	0.560118
"	N14	80771	116170	132910	147190	36130	52177	55992	55462															0.475507	0.509384	0.546273	0.593827
"	N15	81502	121760	139240	153380	43452	55644	60446	61695															0.552686	0.550857	0.578722	0.623195
"	N16	89171	126830	145180	158550	52763	65553	73677	74121															0.46686	0.543003	0.565886	0.597764
"	N17	103220	143490	158040	167810	64516	74802	84054	84328															0.408294	0.483143	0.492513	0.532507
"	N18	91836	128240	143700	156680	55735	65457	73930	75010															0.374966	0.478695	0.468147	0.497479
"	N19	87546	124460	137090	145460	58494	68594	77431	77871															0.393103	0.489574	0.485525	0.521254
"	N20	59104	97382	106960	109560	45447	56238	61702	66434															0.331848	0.448867	0.435181	0.464657
"	N21	52233	84417	94647	99610	42632	56011	58212	60724															0.231067	0.422501	0.42313	0.393629
"	N22	35890	62511	70231	74160	39976	53767	57737	59071															0.183811	0.336496	0.384957	0.390382
																								-0.113848	0.139879	0.177899	0.203465
	Mean controls	89983.3	136932	152786	162063	53115.2	66790.3	72201	74354.7
																						STDEV (177Lu-lilotomab alone):		0.17405	0.0906654	0.0852517	0.0850059
	Mean effect of Betalutin alone (F̅b)=1-(〖averageRLU〗_(177Lu-lilotomab)/〖averageRLU〗_control )					0.409721	0.512238	0.527437	0.541198													2xSTDEV (177Lu-lilotomab alone)		0.348101	0.181331	0.170503	0.170012

## Sheet: P2_10nM
P2_10 nM		RAW DATA (RLU)
											Effect of drug alone (Fa) =1-(〖RLU〗_drug/〖averageRLU〗_control )						Expected value if additive effect (E) =Fa+F̅b-Fa*F̅b							Measured effect (M) =1-(〖RLU〗_combination/〖averageRLU〗_control )					Measured effect- Expected additive value (M-E)					Bliss score = (M-E)/(1-Fa)
		Minus_177Lu-lilotomab satetraxetan				Plus_177Lu-lilotomab satetraxetan											(Bliss Independence)
		Dy3	Dy4	Dy5	Dy6	Dy3	Dy4	Dy5	Dy6		Dy3	Dy4	Dy5	Dy6			Dy3	Dy4	Dy5	Dy6				Dy3	Dy4	Dy5	Dy6		Dy3	Dy4	Dy5	Dy6		Dy3	Dy4	Dy5	Dy6
Abitrexate (Methotrexate)	Sell 193	161450	229000	272370	314700	85159	93201	104500	108510		-0.206242	-0.25488	-0.281706	-0.38974			0.331193	0.431982	0.44713	0.41692				0.363751	0.489275	0.508249	0.520811		0.0325582	0.0572926	0.0611189	0.103891		0.0269914	0.0456558	0.0476856	0.0747557
Aprepitant (MK-0869)	Sell 194	163660	229490	274440	307540	92848	97629	110370	115910		-0.222754	-0.257566	-0.291447	-0.358121			0.322038	0.430767	0.442928	0.430186				0.306304	0.46501	0.480626	0.488132		-0.0157338	0.0342433	0.0376979	0.0579458		-0.0128675	0.0272299	0.0291904	0.0426662
BKM120 (NVP-BKM120)	Sell 195	165980	230090	272540	311740	97987	105140	114560	117680		-0.240087	-0.260853	-0.282506	-0.376668			0.312427	0.429278	0.446785	0.422405				0.267909	0.423851	0.460909	0.480316		-0.0445182	-0.00542738	0.0141241	0.0579112		-0.0358993	-0.00430453	0.0110129	0.0420662
CAL-101 (GS-1101)	Sell 196	147460	219520	251140	284120	84740	100690	109690	113260		-0.101719	-0.202932	-0.181803	-0.254696			0.389146	0.455496	0.490224	0.473579				0.366881	0.448236	0.483826	0.499835		-0.022265	-0.00726027	-0.0063977	0.0262556		-0.0202093	-0.00603548	-0.00541351	0.0209259
CUDC-101	Sell 197	159270	223620	256820	281180	84993	97245	107260	114110		-0.189955	-0.225399	-0.208532	-0.241713			0.340223	0.445327	0.478694	0.479027				0.364991	0.467114	0.495261	0.496081		0.0247677	0.0217875	0.0165668	0.0170547		0.020814	0.0177799	0.0137082	0.0137348
ENMD-2076	Sell 198	170040	234620	279980	327650	88875	93966	104300	108430		-0.270421	-0.285677	-0.317517	-0.446928			0.295609	0.418042	0.431683	0.392926				0.335988	0.485083	0.50919	0.521165		0.0403789	0.0670406	0.0775072	0.128238		0.0317839	0.0521442	0.0588282	0.0886278
Etoposide (VP-16)	Sell 199	168640	232830	276640	322190	87609	89341	95840	100550		-0.259961	-0.275868	-0.3018	-0.422816			0.301408	0.422482	0.438462	0.403043				0.345446	0.510427	0.549001	0.555963		0.0440381	0.0879448	0.110538	0.15292		0.0349519	0.0689294	0.0849118	0.107477
Gossypol	Sell 200	165250	233280	273730	305540	86483	95839	106000	110930		-0.234633	-0.278334	-0.288106	-0.349289			0.315451	0.421366	0.444369	0.433892				0.353859	0.474819	0.50119	0.510124		0.0384077	0.0534531	0.0568208	0.0762323		0.0311086	0.0418146	0.0441119	0.0564981
Letrozole	Sell 201	159830	227130	265390	295990	77956	91517	101160	105290		-0.194139	-0.244633	-0.24886	-0.307115			0.337904	0.43662	0.461298	0.451586				0.417567	0.498503	0.523966	0.535031		0.0796631	0.0618822	0.0626677	0.0834446		0.0667118	0.0497193	0.05018	0.0638388
LY2157299	Sell 202	165020	229900	269750	303780	84174	93602	105760	107900		-0.232915	-0.259812	-0.269377	-0.341516			0.316404	0.42975	0.452448	0.437153				0.37111	0.487077	0.50232	0.523505		0.0547061	0.0573276	0.0498714	0.086352		0.0443714	0.0455049	0.0392881	0.064369
Mocetinostat (MGCD0103)	Sell 203	140990	200210	233520	258710	71476	81627	89371	95938		-0.0533795	-0.0971162	-0.0988875	-0.142484			0.415948	0.503394	0.52599	0.520659				0.465981	0.552698	0.579442	0.57633		0.0500324	0.0493046	0.0534526	0.055671		0.0474971	0.0449402	0.0486424	0.048728
Paclitaxel (Taxol)	Sell 204	7606	7817	7397	7555	5177	4239	3520	3118		0.943173	0.957164	0.965192	0.966637			0.968492	0.98061	0.984985	0.986002				0.961321	0.976771	0.983436	0.986231		-0.00717107	-0.00383948	-0.00154946	0.000228654		-0.126192	-0.0896325	-0.0445138	0.00685342
PH-797804	Sell 205	157540	221150	258990	290400	79012	89866	101730	108350		-0.17703	-0.211864	-0.218743	-0.282429			0.34739	0.451453	0.474289	0.461944				0.409677	0.50755	0.521284	0.521518		0.0622871	0.0560965	0.0469944	0.0595742		0.0529189	0.0462894	0.0385597	0.0464542
Rapamycin (Sirolimus)	Sell 206	29900	37877	45648	57078	21604	22760	25415	28674		0.776608	0.792441	0.785192	0.747939			0.876139	0.906049	0.907341	0.894245				0.83859	0.875279	0.880403	0.873373		-0.0375493	-0.0307697	-0.0269382	-0.0208719		-0.168087	-0.148245	-0.125406	-0.082805
Simvastatin (Zocor)	Sell 207	160280	222120	260310	288830	67868	81357	90382	94716		-0.197501	-0.217179	-0.224955	-0.275496			0.33604	0.449047	0.47161	0.464853				0.492937	0.554178	0.574685	0.581727		0.156898	0.10513	0.103075	0.116874		0.131021	0.0863721	0.0841457	0.0916303
Tandutinib (MLN518)	Sell 208	154860	214460	251780	276650	77711	88282	97758	103820		-0.157007	-0.175204	-0.184815	-0.221708			0.358492	0.468047	0.488925	0.48742				0.419397	0.51623	0.539975	0.541523		0.0609054	0.0481825	0.0510504	0.0541029		0.0526405	0.0409992	0.0430873	0.0442846
Vinpocetine (Cavinton)	Sell 209	148170	206270	239900	264230	72646	85160	95858	103140		-0.107024	-0.130324	-0.12891	-0.16686			0.386205	0.488362	0.513039	0.510432				0.457239	0.533338	0.548916	0.544526		0.0710342	0.0449758	0.0358768	0.0340939		0.0641668	0.0397902	0.03178	0.0292185
WZ4002	Sell 210	159110	218220	258380	284900	80687	92353	102630	109610		-0.18876	-0.195808	-0.215873	-0.258141			0.340886	0.458721	0.475528	0.472134				0.397163	0.493922	0.517049	0.515954		0.0562764	0.0352005	0.041521	0.0438195		0.0473404	0.0294366	0.0341492	0.0348287
AR-A 014418	Sell 211	149920	204720	246050	261680	67504	77956	85269	88511		-0.120098	-0.12183	-0.157851	-0.155599			0.378956	0.492207	0.500556	0.515156				0.495657	0.572815	0.598745	0.609128		0.116701	0.0806078	0.0981896	0.093972		0.104188	0.0718538	0.0848033	0.0813189
Combretastatin A4	Sell 212	6277	6401	6136	5753	4878	4424	4171	3617		0.953103	0.964924	0.971125	0.974594			0.973998	0.984123	0.987545	0.989341				0.963555	0.975757	0.980372	0.984027		-0.0104425	-0.00836554	-0.00717254	-0.00531373		-0.222668	-0.238495	-0.248404	-0.209155
JNK Inhibitor V	Sell 213	171990	231550	275650	331060	99774	106100	113370	117490		-0.28499	-0.268854	-0.297141	-0.461987			0.287531	0.425657	0.440472	0.386608				0.254558	0.41859	0.466509	0.481155		-0.032973	-0.00706659	0.0260367	0.0945465		-0.0256601	-0.00556927	0.0200724	0.0646699
NU6027	Sell 214	164090	226910	272750	340580	103180	106030	115660	118570		-0.225967	-0.243428	-0.283494	-0.504028			0.320257	0.437166	0.446359	0.36897				0.229111	0.418974	0.455733	0.476386		-0.091146	-0.0181922	0.009374	0.107416		-0.0743463	-0.0146307	0.0073035	0.0714188
SecinH3	Sell 215	166190	223360	269960	323290	96983	100810	110170	114500		-0.241656	-0.223974	-0.270365	-0.427674			0.311557	0.445972	0.452022	0.401005				0.27541	0.447579	0.481567	0.494359		-0.0361471	0.00160699	0.0295453	0.0933543		-0.029112	0.00131293	0.0232573	0.0653891
Streptozotocin (Zanosar)	Sell 216	169090	231340	275350	333310	83352	90553	101840	109540		-0.263323	-0.267703	-0.295729	-0.471923			0.299544	0.426178	0.441081	0.38244				0.377252	0.503785	0.520766	0.516263		0.0777075	0.0776074	0.0796851	0.133823		0.0615104	0.0612189	0.0614983	0.0909172
ABT-888 (Veliparib)	Sell 217	153250	214600	258350	297520	88572	93517	102860	109080		-0.144978	-0.175971	-0.215731	-0.313872			0.365161	0.4677	0.475588	0.448752				0.338251	0.487543	0.515966	0.518294		-0.0269099	0.0198428	0.0403778	0.0695425		-0.0235026	0.0168736	0.0332128	0.0529294
AUY922 (NVP-AUY922)	Sell 218	124150	187510	226950	261710	80600	106940	112740	109570		0.0724373	-0.0275224	-0.0679707	-0.155732			0.485708	0.534895	0.539326	0.515101				0.397813	0.413987	0.469473	0.51613		-0.0878955	-0.120908	-0.0698523	0.00102942		-0.0947597	-0.117669	-0.0654066	0.000890712
BIBF1120 (Vargatef)	Sell 219	149780	209560	252390	287660	94825	102680	114520	117890		-0.119052	-0.148353	-0.187685	-0.270329			0.379536	0.480202	0.487686	0.46702				0.291533	0.437331	0.461097	0.479388		-0.0880025	-0.0428702	-0.0265892	0.0123681		-0.0786402	-0.0373319	-0.0223874	0.00973613
Celecoxib	Sell 220	147310	206030	245070	280210	88716	95461	105210	110560		-0.100598	-0.129009	-0.153239	-0.237429			0.389768	0.488957	0.502545	0.480824				0.337176	0.47689	0.504908	0.511758		-0.0525923	-0.0120672	0.00236289	0.0309345		-0.0477852	-0.0106883	0.00204891	0.024999
Cyclophosphamide monohydrate	Sell 221	155880	215700	260710	300250	88652	96685	105880	111910		-0.164627	-0.181999	-0.226837	-0.325928			0.354267	0.464972	0.470798	0.443693				0.337654	0.470183	0.501755	0.505797		-0.0166128	0.0052112	0.0309569	0.0621031		-0.0142645	0.00440881	0.0252331	0.0468375
Dorzolamide HCL	Sell 222	147660	206710	247730	283030	92196	101710	112470	115700		-0.103213	-0.132735	-0.165756	-0.249883			0.388318	0.487271	0.497145	0.475599				0.311175	0.442647	0.470744	0.48906		-0.0771425	-0.044624	-0.0264015	0.0134608		-0.0699253	-0.0393949	-0.0226475	0.0107696
GDC-0941	Sell 223	144830	204400	241780	274370	86896	97357	108830	114870		-0.0820693	-0.120077	-0.137757	-0.21164			0.400041	0.493001	0.509223	0.491644				0.350773	0.4665	0.487873	0.492725		-0.0492679	-0.0265001	-0.0213501	0.0010808		-0.0455312	-0.0236592	-0.0187651	0.00089201
GSK461364	Sell 224	85102	134130	159840	175880	32319	36652	37321	33380		0.364177	0.264991	0.247832	0.2233			0.647465	0.6673	0.675549	0.674128				0.758535	0.799153	0.824377	0.852591		0.11107	0.131853	0.148828	0.178464		0.174687	0.17939	0.197865	0.229772
KU-55933	Sell 225	162220	223190	264080	298390	85683	90454	101660	107440		-0.211995	-0.223043	-0.242695	-0.317714			0.328003	0.446393	0.463957	0.44714				0.359836	0.504328	0.521613	0.525537		0.0318329	0.0579344	0.0576557	0.0783968		0.0262649	0.0473691	0.0463957	0.0594945
MLN2238	Sell 226	162940	218210	255310	294000	82953	92800	101570	107460		-0.217375	-0.195753	-0.201426	-0.298327			0.32502	0.458746	0.481759	0.455274				0.380233	0.491472	0.522037	0.525448		0.0552122	0.0327262	0.0402775	0.0701746		0.0453535	0.0273687	0.0335247	0.05405
Neratinib (HKI-272)	Sell 227	153310	208850	247600	279120	85973	91666	100070	103990		-0.145426	-0.144462	-0.165144	-0.232616			0.364913	0.481963	0.497409	0.482843				0.357669	0.497686	0.529095	0.540772		-0.00724345	0.0157235	0.031686	0.0579286		-0.00632381	0.0137388	0.0271949	0.0469965
PCI-32765 (Ibrutinib)	Sell 228	43327	51877	62675	81025	31523	31317	32305	33179		0.676291	0.715723	0.705067	0.642187			0.820518	0.871323	0.872779	0.849876				0.764482	0.828388	0.847981	0.853479		-0.0560358	-0.0429346	-0.0247985	0.00360294		-0.173105	-0.151031	-0.084082	0.0100693
R935788 (Fostamatinib disodium)	Sell 229	148870	206940	251880	291300	82770	88168	97431	101160		-0.112253	-0.133995	-0.185285	-0.286404			0.383306	0.4867	0.488722	0.460276				0.3816	0.516855	0.541514	0.553269		-0.00170557	0.0301543	0.0527922	0.0929933		-0.00153344	0.0265912	0.0445397	0.0722894
Rucaparib (AG-014699 , PF-01367338)	Sell 230	141670	188120	233510	263780	82486	88732	95599	95509		-0.05846	-0.0308651	-0.0988404	-0.164873			0.413132	0.533382	0.52601	0.511266				0.383722	0.513764	0.550135	0.578225		-0.0294097	-0.0196179	0.0241248	0.0669592		-0.0277854	-0.0190306	0.0219548	0.057482
Sodium butyrate	Sell 231	164570	228430	277070	350110	85653	94161	105830	110930		-0.229553	-0.251757	-0.303823	-0.546113			0.318268	0.433396	0.43759	0.351312				0.36006	0.484014	0.50199	0.510124		0.041792	0.0506181	0.0644005	0.158812		0.0339896	0.0404377	0.0493936	0.102717
TG101348 (SAR302503)	Sell 232	164710	225930	281000	330280	97331	102720	113060	114970		-0.230599	-0.238057	-0.322317	-0.458542			0.317688	0.439597	0.429612	0.388054				0.27281	0.437112	0.467968	0.492283		-0.044878	-0.00248478	0.0383552	0.10423		-0.0364684	-0.002007	0.0290061	0.0714616
Vandetanib (Zactima)	Sell 233	160990	219110	261460	346200	89564	93116	102900	105290		-0.202806	-0.200685	-0.230366	-0.528846			0.333098	0.456513	0.469276	0.358557				0.33084	0.48974	0.515778	0.535031		-0.00225849	0.033227	0.0465024	0.176474		-0.00187768	0.0276733	0.0377956	0.11543
YO-01027	Sell 234	168350	230190	279270	362180	94936	105470	115180	117650		-0.257794	-0.261401	-0.314176	-0.599415			0.30261	0.42903	0.433124	0.328949				0.290704	0.422043	0.457991	0.480448		-0.0119055	-0.00698768	0.0248674	0.151499		-0.0094654	-0.00553962	0.0189224	0.0947218
BD 1047	Sell 235	162800	220610	284390	333440	105110	108110	114950	117750		-0.216329	-0.208905	-0.338269	-0.472497			0.3256	0.452793	0.422731	0.382199				0.214691	0.407576	0.459074	0.480007		-0.110909	-0.0452169	0.0363425	0.097808		-0.0911838	-0.0374032	0.0271564	0.0664232
Elacridar	Sell 236	160030	215020	263540	346630	93677	97071	108130	112480		-0.195633	-0.178272	-0.240154	-0.530745			0.337075	0.466658	0.465054	0.35776				0.30011	0.468068	0.491167	0.503279		-0.0369648	0.0014093	0.0261134	0.145519		-0.0309165	0.00119607	0.0210566	0.0950644
L-NNA	Sell 237	152750	210710	249110	305900	87016	94938	104340	111390		-0.141242	-0.154654	-0.17225	-0.350878			0.367233	0.477349	0.494344	0.433225				0.349877	0.479756	0.509002	0.508093		-0.0173558	0.00240713	0.0146575	0.0748679		-0.0152078	0.00208471	0.0125037	0.0554216
SANT-1	Sell 238	153090	212480	255270	332220	97031	106980	119610	122460		-0.143782	-0.164354	-0.201238	-0.46711			0.365824	0.472959	0.48184	0.384459				0.275052	0.413768	0.437145	0.459207		-0.0907725	-0.0591906	-0.0446955	0.0747479		-0.0793617	-0.0508356	-0.0372079	0.0509491
SID 7969543	Sell 239	149910	206360	251100	308240	82399	88167	97259	104980		-0.120024	-0.130817	-0.181615	-0.361212			0.378997	0.488139	0.490305	0.42889				0.384372	0.51686	0.542323	0.5364		0.00537449	0.0287212	0.0520183	0.107511		0.00479855	0.0253986	0.0440231	0.0789815
Ellagic acid	Sell 240	149900	203430	247750	301560	84163	94754	102560	106270		-0.119949	-0.114761	-0.16585	-0.331713			0.379039	0.495407	0.497105	0.441266				0.371192	0.480764	0.517378	0.530703		-0.00784632	-0.0146421	0.0202731	0.089437		-0.00700597	-0.0131347	0.0173891	0.0671594
ABT-263 (Navitoclax)	Sell 241	118330	170300	202330	229990	57849	74186	83857	89732		0.11592	0.0667854	0.047885	-0.0156539			0.509818	0.577583	0.589301	0.573872				0.567792	0.593474	0.60539	0.603736		0.0579748	0.0158904	0.0160891	0.0298644		0.0655764	0.0170276	0.0168982	0.0294041
AR-42 (HDAC-42)	Sell 242	137300	190940	222080	249760	63743	76001	84478	90839		-0.0258104	-0.0463182	-0.0450537	-0.10296			0.431234	0.526387	0.549211	0.537242				0.523756	0.583528	0.602467	0.598848		0.0925222	0.0571406	0.0532563	0.0616059		0.0901943	0.0546111	0.0509604	0.0558551
BEZ235 (NVP-BEZ235)	Sell 243	138320	196470	238790	284670	87755	103400	115080	119520		-0.0334311	-0.0766217	-0.123687	-0.257125			0.427009	0.51267	0.515292	0.47256				0.344355	0.433386	0.458462	0.47219		-0.0826534	-0.0792845	-0.0568304	-0.000370018		-0.0799796	-0.0736419	-0.0505749	-0.000294336
Canagliflozin	Sell 244	145340	201800	239260	275110	88032	95559	106440	108930		-0.0858797	-0.105829	-0.125899	-0.214907			0.397929	0.49945	0.514338	0.490273				0.342286	0.476353	0.49912	0.518957		-0.0556426	-0.0230965	-0.0152186	0.0286834		-0.051242	-0.0208861	-0.0135169	0.0236095
cx-4945 (Silmitasertib)	Sell 245	152910	205770	246790	292380	79069	87979	100260	103730		-0.142438	-0.127584	-0.161333	-0.291173			0.36657	0.489602	0.499053	0.458275				0.409251	0.51789	0.528201	0.54192		0.0426814	0.0282879	0.0291477	0.083645		0.03736	0.0250872	0.0250985	0.0647822
Entinostat (MS-275, SNDX-275)	Sell 246	137680	187630	222280	252130	68831	78872	88222	92589		-0.0286495	-0.02818	-0.0459948	-0.113426			0.42966	0.534597	0.548805	0.532851				0.485742	0.567795	0.584849	0.59112		0.0560824	0.0331978	0.036044	0.0582689		0.0545204	0.0322879	0.034459	0.052333
Everolimus (RAD001)	Sell 247	30037	42333	54456	78511	24004	29627	35562	48102		0.775584	0.768022	0.743744	0.653289			0.875572	0.894996	0.889463	0.854534				0.820659	0.837649	0.832654	0.787578		-0.0549129	-0.0573469	-0.0568085	-0.0669562		-0.244693	-0.247209	-0.221686	-0.193118
GSK1120212 (Trametinib)	Sell 248	129580	180780	228200	279570	71830	93380	111230	121130		0.0318681	0.00935681	-0.0738529	-0.234603			0.463214	0.551588	0.536788	0.48201				0.463336	0.488294	0.476579	0.46508		0.000121632	-0.0632945	-0.0602093	-0.0169292		0.000125636	-0.0638923	-0.0560685	-0.0137123
Linifanib (ABT-869)	Sell 249	148590	202330	245800	291820	73044	82802	90570	93947		-0.110161	-0.108733	-0.156674	-0.2887			0.384465	0.498135	0.501063	0.459313				0.454266	0.546259	0.5738	0.585123		0.0698005	0.0481243	0.0727369	0.12581		0.0628741	0.0434048	0.0628845	0.0976255
LY2603618 (IC-83)	Sell 250	138030	186930	228630	262880	70967	85652	93553	97358		-0.0312645	-0.0243441	-0.0758763	-0.160899			0.42821	0.536334	0.535916	0.512933				0.469784	0.530642	0.559763	0.570059		0.0415735	-0.00569177	0.0238471	0.0571264		0.0403132	-0.00555651	0.0221653	0.0492087
Motesanib Diphosphate	Sell 251	142380	221020	272650	358700	85556	88350	98556	102830		-0.0637646	-0.211151	-0.283024	-0.584047			0.41019	0.451776	0.446562	0.335397				0.360785	0.515857	0.53622	0.545895		-0.0494055	0.0640814	0.0896582	0.210498		-0.046444	0.0529095	0.0698804	0.132886
Pemetrexed	Sell 252	150100	218620	272190	337170	96568	98943	109850	113920		-0.121443	-0.198	-0.280859	-0.488969			0.37821	0.457729	0.447495	0.375288				0.278511	0.457809	0.483073	0.49692		-0.0996994	8.06017e-05	0.0355777	0.121633		-0.0889028	6.72803e-05	0.0277764	0.0816891
PHA-665752	Sell 253	146450	211920	261060	311420	96511	102600	113800	116180		-0.0941729	-0.161285	-0.228484	-0.375255			0.39333	0.474348	0.470088	0.422998				0.278937	0.43777	0.464485	0.48694		-0.114394	-0.036578	-0.00560224	0.0639424		-0.104548	-0.0314979	-0.00456029	0.0464949
RG108	Sell 254	146130	212760	265390	336180	92247	99003	111550	113870		-0.091782	-0.165888	-0.24886	-0.484597			0.394656	0.472264	0.461298	0.377122				0.310794	0.457481	0.475073	0.497141		-0.0838616	-0.0147835	0.0137749	0.120019		-0.0768117	-0.01268	0.01103	0.0808429
Sunitinib Malate (Sutent)	Sell 255	149540	212190	258480	342150	94875	100010	111160	115390		-0.117259	-0.162765	-0.216343	-0.510961			0.38053	0.473678	0.475325	0.366061				0.29116	0.451962	0.476908	0.490429		-0.0893703	-0.0217155	0.00158393	0.124368		-0.0799906	-0.0186758	0.00130221	0.0823105
Telatinib (BAY 57-9352)	Sell 256	139170	198470	239700	290050	86848	93634	105620	112730		-0.0397818	-0.0875813	-0.127969	-0.280884			0.423488	0.507709	0.513445	0.462592				0.351132	0.486902	0.502978	0.502175		-0.0723558	-0.0208076	-0.0104668	0.0395833		-0.0695875	-0.019132	-0.0092793	0.0309031
TW-37	Sell 257	147580	210820	261260	330310	92407	97508	109270	114520		-0.102615	-0.155257	-0.229425	-0.458675			0.388649	0.477076	0.469682	0.387998				0.309599	0.465673	0.485802	0.494271		-0.0790504	-0.0114032	0.0161208	0.106273		-0.0716935	-0.00987069	0.0131125	0.0728556
XAV-939	Sell 258	135450	194710	238030	297430	87373	94423	104030	108900		-0.0119885	-0.0669772	-0.12011	-0.313474			0.438898	0.517036	0.516835	0.448918				0.34721	0.482578	0.51046	0.519089		-0.0916884	-0.0344576	-0.00637446	0.0701706		-0.0906022	-0.0322946	-0.00569092	0.0534237
BML-277	Sell 259	135000	191810	229350	280880	80264	89385	102060	109590		-0.0086264	-0.0510857	-0.0792645	-0.240388			0.440762	0.524229	0.534454	0.479582				0.400323	0.510186	0.519731	0.516042		-0.040439	-0.0140435	-0.0147232	0.0364595		-0.0400931	-0.0133609	-0.0136419	0.0293936
cPEPCK inhibitor	Sell 260	143430	199640	245900	307370	73536	81276	92941	100110		-0.0716095	-0.0939927	-0.157145	-0.35737			0.405841	0.504807	0.50086	0.430501				0.45059	0.554622	0.562643	0.557906		0.0447493	0.0498142	0.0617825	0.127405		0.0417589	0.0455343	0.0533922	0.0938616
JZL 184	Sell 261	132460	191740	231070	279290	83661	91686	102490	109370		0.0103507	-0.0507021	-0.0873584	-0.233367			0.451284	0.524403	0.530963	0.482528				0.374943	0.497577	0.517707	0.517013		-0.076341	-0.0268262	-0.0132554	0.0344851		-0.0771394	-0.0255317	-0.0121904	0.0279601
Oxamflatin	Sell 262	122480	177420	202570	218460	64481	79620	87220	88981		0.0849144	0.027769	0.0467556	0.0352634			0.492626	0.559922	0.588813	0.595235				0.518243	0.563696	0.589564	0.607053		0.0256165	0.00377367	0.000750789	0.011818		0.0279935	0.00388146	0.000787614	0.01225
SJ 172550	Sell 263	136050	188600	227350	271760	73302	81628	93410	99472		-0.0164713	-0.0334954	-0.069853	-0.200114			0.436412	0.532191	0.538514	0.49648				0.452338	0.552693	0.560436	0.560724		0.0159259	0.0205014	0.0219218	0.0642437		0.0156678	0.0198369	0.0204905	0.0535314
Pomalidomide	Sell 264	139140	187560	228780	283930	75758	86037	95866	100810		-0.0395576	-0.0277964	-0.0765822	-0.253857			0.423612	0.534771	0.535611	0.473931				0.433989	0.528532	0.548878	0.554815		0.0103767	-0.00623884	0.0132672	0.0808837		0.00998182	-0.00607011	0.0123234	0.0645079
AEE788 (NVP-AEE788)	Sell 265	143360	195420	245000	328860	73617	84314	95054	103110		-0.0710865	-0.0708679	-0.15291	-0.452272			0.406131	0.515275	0.502687	0.390685				0.449985	0.537974	0.552699	0.544658		0.0438541	0.0226991	0.0500124	0.153974		0.0409436	0.0211969	0.0433793	0.106023
Axitinib	Sell 266	146260	203970	258500	364380	79699	89968	101640	105640		-0.0927533	-0.11772	-0.216437	-0.609131			0.394117	0.494067	0.475284	0.324873				0.404544	0.506991	0.521707	0.533485		0.0104269	0.0129238	0.0464233	0.208613		0.00954184	0.0115626	0.0381633	0.129643
BIBR1532	Sell 267	138590	196170	253650	342920	77574	84219	96262	100140		-0.0354484	-0.0749777	-0.193614	-0.514362			0.42589	0.513414	0.485129	0.364634				0.420421	0.538494	0.547015	0.557774		-0.0054696	0.02508	0.0618861	0.19314		-0.00528235	0.0233307	0.0518476	0.127539
CEP33779	Sell 268	138330	194950	255670	340910	84513	94083	107030	107740		-0.0335059	-0.0682923	-0.20312	-0.505485			0.426968	0.516441	0.481028	0.368358				0.368577	0.484441	0.496343	0.524212		-0.05839	-0.0319992	0.0153148	0.155853		-0.0564971	-0.0299536	0.0127293	0.103524
Cyclosporin A (Cyclosporine A)	Sell 269	93071	140800	164640	174870	63537	74952	79804	76785		0.304638	0.22844	0.225245	0.22776			0.614453	0.650756	0.665806	0.675999				0.525296	0.589276	0.624462	0.660911		-0.0891575	-0.0614798	-0.0413435	-0.0150875		-0.128217	-0.0796824	-0.0533633	-0.0195374
Dovitinib (TKI-258)	Sell 270	121520	174780	216860	264500	77536	91059	101540	106400		0.0920868	0.0422358	-0.0204896	-0.168053			0.496603	0.566471	0.559807	0.509931				0.420705	0.501012	0.522178	0.530129		-0.0758982	-0.0654584	-0.037629	0.0201977		-0.0835963	-0.068345	-0.0368735	0.0172918
Gefitinib (Iressa)	Sell 271	134700	202660	248240	325640	80032	87298	96451	101180		-0.00638501	-0.110542	-0.168156	-0.438052			0.442005	0.497316	0.49611	0.396651				0.402056	0.521622	0.546125	0.553181		-0.0399484	0.0243056	0.0500152	0.156531		-0.039695	0.0218862	0.0428155	0.108849
GSK690693	Sell 272	128910	194150	240740	300230	96323	97865	111500	114540		0.0368739	-0.0639085	-0.132863	-0.325839			0.46599	0.518425	0.511334	0.443731				0.280341	0.463717	0.475309	0.494182		-0.185649	-0.0547082	-0.0360255	0.0504518		-0.192756	-0.0514219	-0.0318004	0.0380527
KU-60019	Sell 273	135670	197620	244950	320880	97093	102070	116470	118090		-0.0136322	-0.0829235	-0.152674	-0.417031			0.437987	0.509818	0.502788	0.40547				0.274588	0.440674	0.451921	0.478505		-0.163398	-0.0691438	-0.0508675	0.0730353		-0.161201	-0.0638492	-0.04413	0.051541
MLN8237 (Alisertib)	Sell 274	134740	196650	241320	286610	80525	82005	93756	96834		-0.00668386	-0.0776081	-0.135592	-0.265692			0.441839	0.512224	0.510157	0.468966				0.398373	0.550627	0.558807	0.572373		-0.0434661	0.0384029	0.0486506	0.103408		-0.0431775	0.0356372	0.0428416	0.0817004
Nilotinib (AMN-107)	Sell 275	138330	199950	246260	298440	84020	88282	101560	104830		-0.0335059	-0.0956915	-0.158839	-0.317935			0.426968	0.504038	0.500129	0.447047				0.372261	0.51623	0.522084	0.537062		-0.0547067	0.0121915	0.0219544	0.0900154		-0.0529331	0.0111267	0.0189452	0.0683003
PD 0332991 HCl	Sell 276	138370	195670	244000	303190	81358	86374	96125	103120		-0.0338047	-0.0722378	-0.148204	-0.338911			0.426802	0.514655	0.504717	0.438246				0.392149	0.526685	0.547659	0.544614		-0.0346524	0.0120307	0.0429427	0.106368		-0.0335193	0.0112202	0.0373999	0.0794435
Ranolazine (Ranexa)	Sell 277	129190	188660	234090	300740	78684	86381	96975	101590		0.0347819	-0.0338242	-0.10157	-0.328092			0.46483	0.532042	0.524833	0.442786				0.412128	0.526647	0.54366	0.551371		-0.0527023	-0.00539543	0.018827	0.108585		-0.0546014	-0.0052189	0.0170911	0.0817601
Ruxolitinib (INCB018424)	Sell 278	130780	186350	229340	287230	90985	101290	112780	115990		0.0229025	-0.0211658	-0.0792174	-0.26843			0.458243	0.537772	0.534474	0.467817				0.320223	0.444948	0.469285	0.487779		-0.13802	-0.092824	-0.0651892	0.0199619		-0.141255	-0.0909	-0.0604041	0.0157375
Sorafenib (Nexavar)	Sell 279	138540	193140	229740	287280	89932	93604	106740	111540		-0.0350748	-0.0583739	-0.0810997	-0.268651			0.426098	0.52093	0.533662	0.467724				0.32809	0.487066	0.497708	0.507431		-0.0980071	-0.0338639	-0.0359545	0.0397061		-0.094686	-0.0319962	-0.0332573	0.0312979
Trichostatin A (TSA)	Sell 280	132400	193910	226790	263120	71317	84485	96327	99346		0.010799	-0.0625933	-0.0672178	-0.161959			0.451533	0.51902	0.53965	0.512488				0.467169	0.537037	0.546709	0.56128		0.0156363	0.0180166	0.00705845	0.0487919		0.015807	0.0169553	0.00661388	0.0419911
Vatalanib dihydrochloride (PTK787)	Sell 281	139100	192010	230360	279050	89114	89565	100560	105430		-0.0392588	-0.0521817	-0.0840173	-0.232307			0.423778	0.523733	0.532404	0.482973				0.334202	0.509199	0.526789	0.534413		-0.0895758	-0.0145338	-0.00561445	0.0514397		-0.086192	-0.013813	-0.00517929	0.0417426
Zibotentan (ZD4054)	Sell 282	132940	187860	226920	282590	82091	88741	98305	103620		0.00676449	-0.0294404	-0.0678295	-0.24794			0.449296	0.534027	0.539387	0.476414				0.386673	0.513715	0.537401	0.542406		-0.0626226	-0.0203122	-0.00198565	0.0659918		-0.0630491	-0.0197313	-0.00185952	0.0528806
BI 78D3	Sell 283	133030	187470	231040	305640	78945	86649	97763	101120		0.00609207	-0.0273032	-0.0872172	-0.34973			0.448923	0.534994	0.531024	0.433707				0.410178	0.525178	0.539951	0.553446		-0.0387451	-0.00981573	0.00892784	0.119739		-0.0389826	-0.00955485	0.00821165	0.0887135
ICI 182,780	Sell 284	134610	187930	229120	306150	77886	88477	101360	106230		-0.00571259	-0.029824	-0.0781822	-0.351983			0.442378	0.533853	0.534921	0.432762				0.41809	0.515161	0.523025	0.53088		-0.0242878	-0.0186919	-0.0118961	0.098118		-0.0241499	-0.0181505	-0.0110334	0.0725735
Lomeguatrib	Sell 285	135480	190430	237520	309490	75357	85555	96965	102350		-0.0122126	-0.0435235	-0.11771	-0.366732			0.438774	0.527652	0.51787	0.426574				0.436985	0.531173	0.543707	0.548014		-0.0017889	0.00352127	0.0258365	0.121441		-0.00176731	0.0033744	0.0231155	0.0888549
SANT-2	Sell 286	121900	171350	210410	254920	73281	82454	92594	97718		0.0892477	0.0610316	0.00986247	-0.125747			0.495029	0.574979	0.572899	0.527681				0.452495	0.548166	0.564275	0.56847		-0.0425337	-0.0268124	-0.00862391	0.0407882		-0.0467017	-0.0285551	-0.00870981	0.0362321
SK1-I	Sell 287	124150	170600	214160	260420	71788	84262	94318	96902		0.0724373	0.0651414	-0.0077841	-0.150035			0.485708	0.576839	0.565287	0.517491				0.46365	0.538259	0.556163	0.572073		-0.0220584	-0.0385802	-0.00912469	0.0545822		-0.023781	-0.0412685	-0.00905421	0.0474613
FK-506 (Tacrolimus)	Sell 288	35202	66351	81250	90151	26676	35422	35229	28296		0.736995	0.636408	0.617658	0.601886			0.854176	0.835421	0.835075	0.832967				0.800695	0.805894	0.834221	0.875043		-0.0534802	-0.0295276	-0.00085372	0.0420754		-0.203343	-0.0812107	-0.00223287	0.105687
Anagrelide hydrochloride	Sell 289	112480	162230	198950	244720	56297	70332	79143	81190		0.159627	0.111008	0.0637904	-0.0807028			0.534051	0.5976	0.596161	0.54658				0.579388	0.614593	0.627573	0.641459		0.0453366	0.0169926	0.0314111	0.0948785		0.0539483	0.0191145	0.0335514	0.0877933
AT-406	Sell 290	133130	203620	248830	320930	72811	80313	88996	90898		0.00534494	-0.115802	-0.170933	-0.417252			0.448509	0.494935	0.494913	0.405377				0.456007	0.559899	0.581207	0.598587		0.00749817	0.0649634	0.0862942	0.19321		0.00753846	0.0582212	0.073697	0.136327
BI 2536	Sell 291	12943	19141	21176	20859	9380	7409	6335	4888		0.903299	0.895111	0.900351	0.907885			0.946384	0.952522	0.957016	0.961352				0.929919	0.9594	0.970189	0.978414		-0.0164644	0.00687783	0.0131731	0.017062		-0.170261	0.0655722	0.132195	0.185225
Irinotecan HCl Trihydrate (Campto)	Sell 292	140860	211530	259860	342090	104500	105400	111620	110870		-0.0524083	-0.159148	-0.222837	-0.510696			0.416487	0.475315	0.472523	0.366172				0.219248	0.422426	0.474744	0.510389		-0.197239	-0.0528889	0.00222048	0.144217		-0.187416	-0.0456274	0.00181584	0.0954642
CYC116	Sell 293	139980	206340	245680	300470	83606	94665	105290	107670		-0.0458335	-0.130708	-0.156109	-0.326899			0.420132	0.488188	0.501307	0.443286				0.375354	0.481252	0.504531	0.524521		-0.0447784	-0.00693635	0.00322463	0.0812349		-0.042816	-0.00613452	0.00278921	0.0612216
Disulfiram (Antabuse)	Sell 294	137570	200760	243730	290410	80017	85952	95999	102140		-0.0278277	-0.10013	-0.146933	-0.282473			0.430116	0.502029	0.505265	0.461925				0.402168	0.528998	0.548252	0.548942		-0.0279474	0.0269686	0.0429876	0.0870166		-0.0271907	0.024514	0.0374805	0.0678506
Evista (Raloxifene Hydrochloride)	Sell 295	126180	189870	244630	333310	84655	94960	103900	107530		0.0572705	-0.0404548	-0.151168	-0.471923			0.477299	0.529041	0.503438	0.38244				0.367517	0.479636	0.511072	0.525139		-0.109782	-0.0494055	0.00763429	0.142699		-0.116452	-0.0474846	0.00663177	0.0969476
GSK1904529A	Sell 296	125800	187350	235870	303280	83841	88766	99511	102960		0.0601096	-0.0266457	-0.109946	-0.339308			0.478873	0.535292	0.521219	0.438079				0.373598	0.513578	0.531726	0.545321		-0.105275	-0.0217142	0.0105064	0.107241		-0.112008	-0.0211506	0.00946565	0.080072
JNJ-7706621	Sell 297	121800	184740	227590	279070	83913	88398	98547	100470		0.0899948	-0.0123433	-0.0709824	-0.232395			0.495443	0.541766	0.538027	0.482936				0.37306	0.515594	0.536262	0.556317		-0.122383	-0.0261715	-0.00176445	0.0733805		-0.134486	-0.0258524	-0.0016475	0.059543
LY294002	Sell 298	117760	176920	215170	267400	74725	85868	92877	95080		0.120179	0.0305089	-0.0125369	-0.180859			0.512179	0.561163	0.563237	0.504558				0.441707	0.529458	0.562944	0.580119		-0.0704722	-0.0317045	-0.000293555	0.0755609		-0.0800983	-0.0327022	-0.00028992	0.0639881
Mycophenolate mofetil (CellCept)	Sell 299	113770	179100	223230	281870	78608	89314	99095	101830		0.149989	0.0185629	-0.0504653	-0.24476			0.528707	0.555755	0.546877	0.477748				0.412696	0.510575	0.533683	0.550311		-0.116012	-0.0451807	-0.0131933	0.0725625		-0.136483	-0.0460352	-0.0125595	0.0582944
Pazopanib	Sell 300	113850	174380	216880	284900	75364	82481	94162	98711		0.149392	0.0444277	-0.0205837	-0.258141			0.528376	0.567463	0.559766	0.472134				0.436932	0.548018	0.556897	0.564084		-0.0914435	-0.0194446	-0.00286941	0.0919503		-0.107504	-0.0203487	-0.00281153	0.0730843
PHA-793887	Sell 301	119190	173770	207500	258430	79871	88515	99324	102040		0.109495	0.0477704	0.0235562	-0.141247			0.506255	0.568976	0.578806	0.521178				0.403259	0.514953	0.532606	0.549383		-0.102996	-0.054023	-0.0462005	0.0282053		-0.11566	-0.0567331	-0.0473151	0.0247144
Roscovitine (Seliciclib, CYC202)	Sell 302	123800	174570	208500	258890	76383	84169	96870	100960		0.0750522	0.0433865	0.0188505	-0.143279			0.487158	0.566992	0.576776	0.520326				0.429319	0.538768	0.544154	0.554153		-0.0578389	-0.0282233	-0.0326227	0.0338269		-0.0625321	-0.0295033	-0.0332495	0.0295877
TAE684 (NVP-TAE684)	Sell 303	134670	187670	247680	368380	86435	92771	104330	108560		-0.00616087	-0.0283992	-0.165521	-0.626795			0.442129	0.534498	0.497247	0.317461				0.354218	0.491631	0.509049	0.52059		-0.0879115	-0.0428671	0.0118019	0.203129		-0.0873732	-0.0416834	0.0101258	0.124865
Temozolomide	Sell 304	120770	176330	227670	292410	80638	88827	98161	102170		0.0976903	0.033742	-0.0713588	-0.291306			0.49971	0.562626	0.537864	0.45822				0.397529	0.513243	0.538079	0.548809		-0.102181	-0.0493828	0.000214362	0.0905897		-0.113244	-0.0511072	0.000200084	0.0701536
Ubenimex (Bestatin)	Sell 305	115790	170480	217690	267460	76551	84799	95133	96715		0.134897	0.065799	-0.0243954	-0.181124			0.52034	0.577137	0.558122	0.504447				0.428064	0.535316	0.552328	0.572899		-0.0922755	-0.0418205	-0.00579451	0.0684518		-0.106664	-0.0447661	-0.00565652	0.0579548
Estradiol	Sell 306	98759	152660	191690	231430	65655	77738	86355	90314		0.262141	0.16345	0.0979542	-0.0220131			0.590891	0.621338	0.610898	0.571204				0.509471	0.574009	0.593635	0.601166		-0.0814191	-0.0473287	-0.0172635	0.0299623		-0.110345	-0.056576	-0.0191382	0.029317
C 646	Sell 307	134550	195500	243340	333590	83913	87119	95318	97236		-0.00526431	-0.0713063	-0.145098	-0.47316			0.442626	0.515076	0.506056	0.381921				0.37306	0.522603	0.551457	0.570598		-0.0695659	0.00752659	0.0454006	0.188677		-0.0692016	0.00702562	0.0396477	0.128077
DFMO	Sell 308	140600	204470	259050	372960	78172	84142	95080	97603		-0.0504657	-0.12046	-0.219025	-0.647021			0.417564	0.492827	0.474168	0.308976				0.415953	0.538916	0.552577	0.568977		-0.00161101	0.0460895	0.0784095	0.260002		-0.00153361	0.0411344	0.0643214	0.157862
ML 141	Sell 309	142850	204670	251210	381160	87842	93080	99014	100970		-0.0672762	-0.121556	-0.182132	-0.683233			0.408243	0.492331	0.490082	0.293783				0.343705	0.489938	0.534065	0.554109		-0.0645379	-0.00239314	0.043983	0.260326		-0.0604697	-0.00213377	0.0372065	0.154658
PB 28 dihydrochloride	Sell 310	141310	199390	253520	299220	97436	98874	107580	113290		-0.0557703	-0.0926228	-0.193003	-0.321379			0.414623	0.505427	0.485393	0.445602				0.272026	0.458188	0.493755	0.499702		-0.142597	-0.0472399	0.00836248	0.0541006		-0.135064	-0.0432353	0.00700961	0.0409425
SKF 91488	Sell 311	139230	194850	234970	298040	86111	91570	99469	103150		-0.04023	-0.0677444	-0.105711	-0.316168			0.423239	0.516689	0.523046	0.447788				0.356638	0.498212	0.531923	0.544481		-0.0666009	-0.0184764	0.00887714	0.0966933		-0.0640252	-0.0173041	0.00802844	0.0734657
Pimecrolimus	Sell 312	88432	133810	153890	163160	60905	69141	71839	67717		0.339297	0.266744	0.275832	0.279473			0.63367	0.668094	0.687626	0.697695				0.54496	0.621119	0.661943	0.700956		-0.0887101	-0.0469747	-0.0256831	0.00326104		-0.134266	-0.0640632	-0.0354656	0.00452591
Afatinib (BIBW2992)	Sell 313	126730	185410	229630	301810	75417	87114	96940	100100		0.0531613	-0.0160148	-0.0805821	-0.332817			0.475021	0.540104	0.533886	0.440803				0.436536	0.52263	0.543824	0.557951		-0.0384841	-0.0174735	0.00993859	0.117147		-0.0406448	-0.0171981	0.00919744	0.0878946
BAY 11-7082 (BAY 11-7821)	Sell 314	124510	184290	225380	291510	78422	91290	101640	105410		0.0697476	-0.00987739	-0.0605827	-0.287331			0.484217	0.542882	0.542513	0.459887				0.414085	0.499747	0.521707	0.534501		-0.0701317	-0.0431354	-0.0208053	0.0746141		-0.07539	-0.0427135	-0.0196169	0.0579603
Bicalutamide (Casodex)	Sell 315	117700	178890	220500	273030	80165	90200	97415	100600		0.120627	0.0197137	-0.0376186	-0.205722			0.512427	0.556276	0.552418	0.494127				0.401063	0.50572	0.541589	0.555742		-0.111365	-0.0505567	-0.0108292	0.0616155		-0.126641	-0.0515734	-0.0104366	0.0511026
CH5132799	Sell 316	115060	177270	220080	289320	80918	91409	98409	103580		0.140351	0.028591	-0.0356422	-0.27766			0.523364	0.560295	0.553271	0.463945				0.395437	0.499094	0.536912	0.542583		-0.127927	-0.0612001	-0.0163592	0.0786378		-0.148813	-0.0630013	-0.0157962	0.0615483
Decitabine	Sell 317	107010	173650	222880	309520	70451	80747	91556	97975		0.200495	0.048428	-0.0488183	-0.366865			0.556711	0.569274	0.547587	0.426518				0.473639	0.55752	0.56916	0.567335		-0.0830717	-0.0117533	0.0215729	0.140817		-0.103904	-0.0123515	0.0205688	0.103022
Febuxostat (Uloric)	Sell 318	124380	181690	233870	333460	84565	90155	103520	107570		0.0707189	0.00437016	-0.100534	-0.472586			0.484755	0.549331	0.525279	0.382162				0.368189	0.505966	0.51286	0.524962		-0.116566	-0.0433649	-0.0124187	0.142801		-0.125437	-0.0435552	-0.0112842	0.0969728
GW 4064	Sell 319	112850	170060	206110	268350	70587	83581	93181	94488		0.156863	0.0681006	0.0300972	-0.185055			0.532518	0.578178	0.581628	0.502798				0.472623	0.541991	0.561513	0.582734		-0.0598956	-0.0361879	-0.0201145	0.0799354		-0.071039	-0.0388324	-0.0207387	0.0674529
KX2-391	Sell 320	125110	178960	215880	271890	71483	83145	92487	96239		0.0652648	0.0193301	-0.015878	-0.200688			0.481731	0.556103	0.561796	0.496239				0.465929	0.54438	0.564779	0.575001		-0.0158028	-0.0117229	0.00298288	0.0787618		-0.0169062	-0.0119539	0.00293626	0.0655972
Megestrol Acetate	Sell 321	136490	184350	235230	329300	79285	86015	96469	101610		-0.0197586	-0.0102062	-0.106934	-0.454215			0.43459	0.542733	0.522519	0.389869				0.407637	0.528653	0.546041	0.551282		-0.0269523	-0.0140805	0.0235222	0.161413		-0.02643	-0.0139382	0.0212498	0.110997
Nocodazole	Sell 322	136200	189560	246840	361100	80072	85375	97605	102690		-0.017592	-0.0387561	-0.161568	-0.594646			0.435791	0.52981	0.498952	0.33095				0.401758	0.53216	0.540695	0.546513		-0.0340335	0.00234966	0.041743	0.215563		-0.0334451	0.002262	0.0359367	0.135179
PD0325901	Sell 323	107310	156790	206990	274540	68625	88608	104590	114190		0.198254	0.140818	0.0259562	-0.21239			0.555468	0.611094	0.579841	0.491329				0.487282	0.514443	0.507825	0.495728		-0.0681864	-0.0966502	-0.0720162	0.00439871		-0.0850474	-0.112491	-0.0739353	0.00362813
PIK-90	Sell 324	112520	171440	228490	304590	76460	85129	93654	97608		0.159329	0.0605384	-0.0752175	-0.345093			0.533886	0.574755	0.5362	0.435652				0.428744	0.533508	0.559287	0.568955		-0.105142	-0.0412477	0.0230877	0.133303		-0.125069	-0.0439056	0.0214726	0.0991032
Salinomycin (Procoxacin)	Sell 325	115660	167430	216420	277640	68191	78121	86856	90667		0.135869	0.0825125	-0.0184191	-0.22608			0.520878	0.584702	0.5607	0.485586				0.490524	0.57191	0.591277	0.599607		-0.0303539	-0.0127915	0.0305771	0.114022		-0.0351265	-0.0139419	0.0300241	0.0929971
Sotrastaurin (AEB071)	Sell 326	105260	158390	196070	253840	62295	72254	79424	84151		0.21357	0.13205	0.077343	-0.120977			0.56396	0.607125	0.602007	0.529682				0.534575	0.604061	0.62625	0.628383		-0.0293851	-0.00306446	0.0242428	0.0987001		-0.0373652	-0.00353069	0.026275	0.0880483
Triptolide	Sell 327	83519	60020	52569	47029	47077	21050	15352	11772		0.376004	0.671101	0.752623	0.792316			0.654022	0.851125	0.893293	0.912864				0.648273	0.88465	0.927757	0.948014		-0.00574896	0.0335249	0.0344644	0.0351498		-0.00921314	0.101931	0.13932	0.169247
Vemurafenib (PLX4032)	Sell 328	136770	196060	247650	350990	77647	82856	93354	95920		-0.0218506	-0.074375	-0.16538	-0.549999			0.43343	0.513687	0.497308	0.349682				0.419875	0.545963	0.560699	0.57641		-0.0135544	0.0322761	0.0633913	0.226728		-0.0132645	0.0300418	0.0543954	0.146276
Zileuton	Sell 329	137720	190530	234600	321680	81737	89908	98468	102690		-0.0289484	-0.0440715	-0.10397	-0.420564			0.429494	0.527404	0.523797	0.403988				0.389318	0.50732	0.536634	0.546513		-0.0401766	-0.0200844	0.0128366	0.142525		-0.0390463	-0.0192366	0.0116276	0.10033
BIBR 1532	Sell 330	134930	186540	229920	284820	79793	83003	91184	94823		-0.00810341	-0.022207	-0.0819468	-0.257788			0.441052	0.537301	0.533297	0.472282				0.403842	0.545158	0.570911	0.581254		-0.03721	0.00785692	0.0376136	0.108972		-0.0369109	0.00768623	0.0347647	0.0866377
GANT 61	Sell 331	137530	189830	232610	301940	79935	88632	98452	104220		-0.0275288	-0.0402356	-0.0946052	-0.333391			0.430282	0.52914	0.527837	0.440562				0.402781	0.514312	0.536709	0.539756		-0.0275004	-0.0148284	0.00887244	0.099194		-0.0267636	-0.0142549	0.00810561	0.0743923
LY 320135	Sell 332	140000	191850	238930	311180	74871	80497	91086	96820		-0.0459829	-0.0513049	-0.124346	-0.374195			0.42005	0.52413	0.515008	0.423442				0.440616	0.55889	0.571372	0.572435		0.0205663	0.0347604	0.0563637	0.148993		0.0196622	0.0330641	0.0501302	0.108422
PF-4708671	Sell 333	133170	186710	230120	304960	66208	76166	87161	93443		0.00504609	-0.0231386	-0.0828879	-0.346727			0.448343	0.536879	0.532891	0.434967				0.50534	0.582623	0.589842	0.587348		0.0569969	0.0457442	0.0569508	0.152382		0.057286	0.0447097	0.0525916	0.11315
SKI II	Sell 334	136660	194290	249920	344690	82555	91139	102800	104430		-0.0210288	-0.0646757	-0.176062	-0.522178			0.433885	0.518078	0.4927	0.361355				0.383206	0.500574	0.516249	0.538829		-0.0506792	-0.0175036	0.0235485	0.177474		-0.0496354	-0.0164403	0.0200232	0.116592
Tofacitinib citrate (CP-690550 citrate)	Sell 335	129330	179600	215960	262290	77550	88382	98695	104610		0.0337359	0.015823	-0.0162545	-0.158293			0.46425	0.554515	0.561634	0.514026				0.4206	0.515682	0.535566	0.538034		-0.0436499	-0.0388332	-0.026068	0.0240078		-0.0451738	-0.0394576	-0.0256511	0.0207269
Anastrozole	Sell 336	132130	184320	223580	274670	69465	76141	86410	94392		0.0128162	-0.0100418	-0.0521123	-0.212964			0.452651	0.542808	0.546166	0.491088				0.481006	0.58276	0.593376	0.583157		0.0283547	0.0399529	0.0472096	0.0920691		0.0287228	0.0395557	0.0448712	0.0759042
AT7519	Sell 337	122690	173380	211340	265250	67616	77249	86429	95351		0.0833454	0.0499075	0.00548612	-0.171365			0.491756	0.569943	0.571012	0.508542				0.49482	0.576689	0.593286	0.578922		0.00306387	0.00674542	0.0222748	0.0703806		0.00334245	0.00709975	0.0223977	0.0600843
BI6727 (Volasertib)	Sell 338	103020	147880	180020	220060	49336	54461	58313	62048		0.230306	0.189643	0.15287	0.0281977			0.573239	0.633194	0.634587	0.59227				0.631396	0.701563	0.725593	0.725991		0.0581563	0.0683688	0.0910069	0.133721		0.0755577	0.0843688	0.10743	0.137601
CP-466722	Sell 339	134550	176940	213630	267160	68936	77977	89350	93324		-0.00526431	0.0303993	-0.00529005	-0.1798			0.442626	0.561113	0.566363	0.505003				0.484958	0.572699	0.579541	0.587874		0.0423318	0.0115864	0.0131777	0.0828709		0.0421102	0.0119497	0.0131083	0.0702415
Cyclopamine	Sell 340	137510	180090	221810	286160	93494	110100	125470	131900		-0.0273794	0.0131379	-0.0437831	-0.263705			0.430364	0.5533	0.549759	0.4698				0.301478	0.396671	0.409569	0.417519		-0.128887	-0.156629	-0.14019	-0.0522804		-0.125452	-0.158714	-0.134309	-0.0413707
Docetaxel (Taxotere)	Sell 341	6258	5957	5704	6122	4287	3372	3157	2614		0.953245	0.967357	0.973158	0.972965			0.974076	0.985224	0.988422	0.988657				0.967971	0.981522	0.985144	0.988456		-0.00610571	-0.00370207	-0.0032778	-0.000200721		-0.130588	-0.11341	-0.122116	-0.00742441
EX 527	Sell 342	135730	175220	215040	278650	64813	72254	81177	87198		-0.0140805	0.0398246	-0.0119252	-0.23054			0.437738	0.565379	0.563501	0.483714				0.515762	0.604061	0.618001	0.614927		0.0780242	0.0386811	0.0544999	0.131213		0.0769408	0.0402855	0.0538576	0.10663
GSK2126458	Sell 343	19293	19730	17320	15186	13809	11422	10233	8727		0.855856	0.891883	0.918496	0.932937			0.920079	0.951061	0.964843	0.971863				0.896829	0.937409	0.951846	0.961461		-0.02325	-0.0136517	-0.012997	-0.0104023		-0.161297	-0.126268	-0.159465	-0.155114
Ku-0063794	Sell 344	121760	164330	203300	256030	65055	73314	84267	85770		0.0902937	0.0995	0.0433204	-0.130649			0.495609	0.592391	0.587332	0.525625				0.513954	0.598252	0.60346	0.621233		0.0183454	0.00586066	0.0161287	0.0956081		0.0201662	0.00650823	0.016859	0.0845604
Maraviroc	Sell 345	124340	165680	202090	244720	61301	71331	81184	80454		0.0710177	0.0921022	0.0490143	-0.0807028			0.484921	0.589043	0.589788	0.54658				0.542001	0.609118	0.617968	0.644709		0.0570803	0.0200757	0.0281804	0.0981287		0.0614439	0.0221123	0.0296328	0.0908008
Mycophenolic (Mycophenolate)	Sell 346	120230	162840	199750	244270	62380	72777	79607	82557		0.101725	0.107665	0.0600258	-0.0787156			0.501947	0.596087	0.594538	0.547414				0.53394	0.601195	0.625389	0.635422		0.0319931	0.00510749	0.0308515	0.0880079		0.0356161	0.00572374	0.0328217	0.0815859
PCI-24781	Sell 347	146270	189670	229350	283360	63648	67799	75358	77303		-0.092828	-0.0393589	-0.0792645	-0.25134			0.394076	0.529537	0.534454	0.474987				0.524466	0.628473	0.645384	0.658624		0.13039	0.098936	0.11093	0.183636		0.119315	0.0951894	0.102783	0.146752
Phloretin (Dihydronaringenin)	Sell 348	141200	193440	248240	353210	78762	81269	90739	91474		-0.0549485	-0.0600178	-0.168156	-0.559803			0.415079	0.520186	0.49611	0.345569				0.411545	0.55466	0.573005	0.596044		-0.00353358	0.0344739	0.0768945	0.250475		-0.00334952	0.032522	0.0658255	0.160581
Rosiglitazone (Avandia)	Sell 349	138940	188050	233310	321640	79050	82475	92593	93624		-0.0380634	-0.0304815	-0.0978993	-0.420388			0.424441	0.533556	0.526416	0.404062				0.409393	0.548051	0.56428	0.586549		-0.0150474	0.0144957	0.0378643	0.182487		-0.0144956	0.0140669	0.034488	0.128477
SNS-314	Sell 350	122660	161520	166920	151480	71812	83434	89376	75555		0.0835695	0.114898	0.214516	0.331052			0.491881	0.599361	0.661178	0.719336				0.463471	0.542796	0.579419	0.666343		-0.02841	-0.0565652	-0.0817589	-0.052993		-0.0310007	-0.0639081	-0.104087	-0.0792185
Temsirolimus (Torisel)	Sell 351	29503	39300	48992	67989	21145	24562	29727	36355		0.779574	0.784643	0.769456	0.699755			0.877784	0.902519	0.900554	0.874029				0.842019	0.865404	0.860112	0.839453		-0.0357645	-0.0371147	-0.0404415	-0.0345758		-0.162252	-0.17234	-0.175418	-0.115159
Valproic acid sodium salt (Sodium valproate)	Sell 352	141140	188770	232310	294420	74631	81971	92316	94381		-0.0545002	-0.034427	-0.0931935	-0.300182			0.415327	0.53177	0.528446	0.454495				0.442409	0.550813	0.565584	0.583206		0.0270818	0.0190435	0.037138	0.128711		0.0256822	0.0184097	0.033972	0.0989944
YM201636	Sell 353	134290	186140	232770	313580	71310	82567	93851	95395		-0.00332177	-0.0200151	-0.0953582	-0.384794			0.443703	0.538293	0.527512	0.418996				0.467221	0.547547	0.55836	0.578728		0.0235179	0.00925395	0.0308484	0.159733		0.02344	0.00907237	0.0281628	0.115348
Bay 11-7085	Sell 354	135390	182490	223480	272120	75267	81131	92091	94804		-0.0115402	-1.36996e-05	-0.0516417	-0.201703			0.439146	0.547347	0.546369	0.495813				0.437657	0.555416	0.566642	0.581338		-0.0014893	0.00806942	0.0202732	0.085525		-0.00147231	0.00806931	0.0192777	0.0711698
EBPC	Sell 355	128970	176980	210800	264030	73177	79848	89222	94612		0.0364256	0.0301801	0.00802723	-0.165977			0.465741	0.561014	0.572108	0.510802				0.453272	0.562447	0.580143	0.582186		-0.0124691	0.00143289	0.00803553	0.0713837		-0.0129405	0.00147748	0.00810056	0.0612222
MRT-10	Sell 356	127390	175990	211210	261030	68125	78821	89250	91750		0.0482302	0.0356052	0.00609787	-0.152729			0.472286	0.563469	0.571276	0.516361				0.491017	0.568075	0.580012	0.594825		0.0187307	0.00460504	0.00873601	0.078464		0.0196799	0.00477506	0.00878961	0.0680681
PD 166285	Sell 357	134310	180880	226680	287010	72560	86377	98690	102880		-0.0034712	0.00880882	-0.0667001	-0.267459			0.44362	0.55134	0.539874	0.468225				0.457882	0.526669	0.535589	0.545674		0.0142616	-0.0246712	-0.00428453	0.0774491		0.0142123	-0.0248905	-0.00401662	0.0611058
Src I1	Sell 358	133380	171930	214530	269040	64172	73365	83837	86864		0.00347711	0.0578533	-0.00952523	-0.188102			0.447473	0.57354	0.564536	0.50152				0.520551	0.597972	0.605484	0.616402		0.0730784	0.0244324	0.0409473	0.114882		0.0733334	0.0259327	0.040561	0.0966937
Apatinib (YN968D1)	Sell 359	139690	178180	220710	283790	68154	76738	86581	87209		-0.0436668	0.0236044	-0.0386068	-0.253239			0.421334	0.558037	0.551992	0.474191				0.490801	0.579489	0.592571	0.614878		0.0694669	0.0214517	0.0405792	0.140687		0.0665604	0.0219703	0.0390708	0.112259
AG14361	Sell 360	135600	177660	221830	276880	58355	67098	76852	78851		-0.0131092	0.0264539	-0.0438772	-0.222724			0.438277	0.559327	0.549719	0.486994				0.564012	0.632315	0.638353	0.651788		0.125735	0.0729874	0.0886349	0.164794		0.124108	0.0749706	0.0849093	0.134776
Belinostat (PXD101)	Sell 361	119470	158950	189190	224550	66533	75595	86336	89840		0.107403	0.128981	0.109719	0.00836952			0.505095	0.605736	0.615973	0.583951				0.502912	0.585752	0.593724	0.603259		-0.00218357	-0.0199835	-0.0222487	0.0193082		-0.00244631	-0.0229427	-0.0249906	0.0194712
BIIB021	Sell 362	134320	177640	225430	289190	65449	75432	84970	89064		-0.00354591	0.0265635	-0.0608179	-0.277086			0.443579	0.559377	0.542411	0.464186				0.51101	0.586646	0.600152	0.606686		0.0674315	0.0272689	0.0577411	0.142501		0.0671932	0.028013	0.0544307	0.111583
CHIR-99021 (CT99021) HCl	Sell 363	125520	165860	205020	256290	62617	73278	82176	87662		0.0622016	0.0911158	0.0352265	-0.131797			0.480033	0.588596	0.58384	0.525143				0.532169	0.598449	0.6133	0.612878		0.0521362	0.00985299	0.0294597	0.0877346		0.0555943	0.0108408	0.0305354	0.077518
Dexamethasone	Sell 364	128960	173940	216340	278620	78348	97196	109580	113680		0.0365003	0.0468388	-0.0180426	-0.230408			0.465783	0.568554	0.560862	0.48377				0.414638	0.467383	0.484344	0.49798		-0.0511447	-0.101172	-0.0765188	0.0142104		-0.0530822	-0.106143	-0.0751627	0.0115493
Doxorubicin (Adriamycin)	Sell 365	107370	123410	134850	137930	22591	22165	19279	15258		0.197806	0.323735	0.365429	0.39089			0.555219	0.69389	0.726275	0.744442				0.831216	0.87854	0.909278	0.932619		0.275996	0.184649	0.183003	0.188178		0.344052	0.273043	0.288389	0.308939
Fingolimod (FTY720)	Sell 366	129860	170660	214690	293410	75317	77271	88035	87333		0.0297761	0.0648127	-0.0102781	-0.295722			0.462055	0.57669	0.564212	0.456367				0.437284	0.576568	0.585729	0.614331		-0.0247709	-0.000121905	0.0215174	0.157964		-0.0255311	-0.000130353	0.0212985	0.121912
JNJ 26854165 (Serdemetan)	Sell 367	140920	188960	252620	302710	100550	95852	106970	113320		-0.0528565	-0.0354682	-0.188767	-0.336791			0.416238	0.531298	0.487219	0.439136				0.24876	0.474748	0.496626	0.49957		-0.167478	-0.0565507	0.00940612	0.0604344		-0.15907	-0.0546137	0.0079125	0.0452085
LDE225 (NVP-LDE225, Erismodegib)	Sell 368	136060	183120	228930	321380	84923	90454	102630	102660		-0.016546	-0.00346599	-0.0772881	-0.419239			0.436371	0.545784	0.535307	0.404544				0.365514	0.504328	0.517049	0.546645		-0.0708568	-0.0414563	-0.018258	0.142102		-0.0697035	-0.0413131	-0.0169481	0.100125
Melphalan	Sell 369	136590	182410	230900	330310	86116	90846	102790	107120		-0.0205058	0.000424687	-0.0865584	-0.458675			0.434175	0.547545	0.531308	0.387998				0.356601	0.50218	0.516296	0.52695		-0.0775745	-0.0453655	-0.0150122	0.138952		-0.0760157	-0.0453848	-0.0138162	0.0952588
Palomid 529	Sell 370	129880	171470	215390	290130	88750	95218	107530	112500		0.0296267	0.060374	-0.0135722	-0.281237			0.461972	0.574681	0.562791	0.462444				0.336922	0.478222	0.49399	0.503191		-0.12505	-0.0964592	-0.0688004	0.0407472		-0.128868	-0.102657	-0.0678791	0.031803
PD153035 HCl	Sell 371	136890	178790	226570	311680	92592	98940	109810	109710		-0.0227472	0.0202617	-0.0661825	-0.376403			0.432933	0.556524	0.540097	0.422516				0.308217	0.457826	0.483261	0.515512		-0.124716	-0.0986984	-0.0568358	0.0929961		-0.121942	-0.10074	-0.0533078	0.0675646
PIK-93	Sell 372	131010	177750	216470	287770	87250	92590	100510	102220		0.0211841	0.0259607	-0.0186544	-0.270815			0.457291	0.559104	0.560599	0.466817				0.348128	0.492623	0.527025	0.548588		-0.109162	-0.0664811	-0.0335738	0.0817719		-0.111525	-0.068253	-0.0329589	0.064346
Sirtinol	Sell 373	137200	182220	225700	309660	87732	96288	105070	107270		-0.0250633	0.00146585	-0.0620885	-0.367483			0.431649	0.548016	0.541863	0.426259				0.344527	0.472358	0.505567	0.526287		-0.0871212	-0.075658	-0.0362965	0.100029		-0.0849911	-0.0757691	-0.0341746	0.073148
SRT1720	Sell 374	125440	166020	199950	263290	79753	87229	92832	99195		0.0627993	0.0902391	0.0590847	-0.162709			0.480364	0.588199	0.594132	0.512173				0.404141	0.522	0.563156	0.561947		-0.0762235	-0.0661992	-0.0309761	0.0497737		-0.081331	-0.0727655	-0.0329212	0.0428084
Tivozanib (AV-951)	Sell 375	126680	170930	206590	276700	73229	82664	91414	98469		0.0535349	0.0633331	0.0278385	-0.221929			0.475228	0.57602	0.580653	0.487327				0.452884	0.547016	0.569828	0.565153		-0.022344	-0.0290049	-0.0108251	0.077826		-0.0236078	-0.0309661	-0.0111351	0.0636911
Vinblastine	Sell 376	122260	164030	204590	270060	82647	90605	101350	106350		0.086558	0.101144	0.03725	-0.192606			0.493538	0.593135	0.584713	0.49963				0.382519	0.5035	0.523072	0.53035		-0.111019	-0.0896352	-0.0616412	0.0307202		-0.121539	-0.0997214	-0.0640262	0.0257589
ZSTK474	Sell 377	105950	152640	178220	202530	73551	85900	91782	96828		0.208415	0.163559	0.161341	0.105612			0.561102	0.621387	0.63824	0.62475				0.450478	0.529283	0.568097	0.5724		-0.110624	-0.0921046	-0.0701437	-0.0523503		-0.13975	-0.110115	-0.0836379	-0.0585319
BIX 01294	Sell 378	123570	160310	200810	244400	67201	75260	81106	83665		0.0767706	0.121529	0.0550377	-0.0792896			0.488111	0.602363	0.592386	0.547173				0.497921	0.587588	0.618335	0.630529		0.00980987	-0.0147744	0.0259492	0.0833558		0.0106256	-0.0168183	0.0274606	0.0772321
GSK 264220A	Sell 379	130570	168800	216570	268940	77357	80916	88278	95967		0.0244715	0.0750051	-0.019125	-0.18766			0.459113	0.581304	0.560396	0.501705				0.422042	0.556594	0.584586	0.576202		-0.0370712	-0.0247095	0.02419	0.0744972		-0.0380011	-0.0267131	0.023736	0.062726
LY 333531	Sell 380	125970	166670	214670	274900	77222	80132	89047	94609		0.0588395	0.0866772	-0.010184	-0.21398			0.478169	0.586587	0.564252	0.490662				0.423051	0.56089	0.580967	0.582199		-0.0551181	-0.0256966	0.0167146	0.091537		-0.058564	-0.0281353	0.016546	0.0754024
PIM-1 Inhibitor 2	Sell 381	118510	159440	200220	247410	71666	74740	83519	89757		0.114575	0.126296	0.0578141	-0.092582			0.509072	0.604521	0.593584	0.541596				0.464561	0.590438	0.60698	0.603626		-0.0445106	-0.0140829	0.0133966	0.06203		-0.0502703	-0.0161186	0.0142187	0.0567738
STAT5 Inhibitor	Sell 382	115980	155460	196750	245690	63003	70988	76161	82614		0.133478	0.148106	0.0741431	-0.0849864			0.519552	0.614393	0.600627	0.544783				0.529285	0.610998	0.641605	0.63517		0.00973281	-0.00339465	0.040978	0.0903872		0.011232	-0.00398483	0.0442595	0.0833072
Azithromycin (Zithromax)	Sell 383	112430	144870	178610	216840	63502	69501	78081	81856		0.160001	0.206137	0.159505	0.0424175			0.534258	0.64066	0.637449	0.598236				0.525557	0.619147	0.63257	0.638517		-0.00870126	-0.0215139	-0.00487852	0.040281		-0.0103587	-0.0271003	-0.00580435	0.0420653
Doxercalciferol (Hectorol)	Sell 384	108860	149170	174940	214190	69023	72752	81917	81665		0.186674	0.182574	0.176776	0.0541201			0.549047	0.629995	0.644898	0.603146				0.484308	0.601332	0.614519	0.639361		-0.0647391	-0.028663	-0.0303793	0.0362145		-0.0795979	-0.0350649	-0.0369029	0.0382866
control (no drug)	D12	159280	218190	252320	272550	79611	92558	101850	105920															Effect of 177Lu-lilotomab alone in each control well
"	E4	160140	213560	245720	290320	81206	88480	99058	105190															0.500182	0.575792	0.596346	0.611374
"	H12	128210	179810	207500	231860	88193	97696	109500	112920															0.492906	0.58569	0.596866	0.637676
"	I7	138670	197680	235080	277370	83762	90811	97110	97852															0.312121	0.456671	0.472289	0.512982
"	I18	122870	177020	210450	237400	75548	86357	97559	100280															0.395962	0.540616	0.586907	0.647215
"	I22	88024	131360	162030	181870	58057	69064	74017	78056															0.385139	0.512162	0.536427	0.577591
"	L4	132870	180570	213320	265790	71145	73755	77376	87814															0.340441	0.474239	0.54319	0.570814
"	M15	97178	134230	156500	171720	66368	72001	85370	84691															0.464552	0.591543	0.637277	0.669611
"																								0.317047	0.4636	0.454505	0.506808
"	C3	163410	234140	265680	288790	88756	101960	108930	114930
"	C4	164320	234270	267160	279680	80837	90051	98825	103930															0.456851	0.564534	0.589995	0.602029
"	C5	170330	235760	266350	302280	80341	91277	100650	107490															0.508051	0.61561	0.630091	0.628397
"	C6	162510	228300	254400	273900	90941	100810	107350	112580															0.528321	0.612839	0.622114	0.644403
"	C7	169780	236320	267330	298870	100100	109320	118720	122660															0.440398	0.558432	0.578027	0.588974
"	C8	175010	235700	278030	312640	90927	102700	110010	115440															0.410413	0.537407	0.555905	0.589587
"	C9	166930	232900	270380	287460	84960	95255	103020	108350															0.480447	0.564277	0.604323	0.630757
"	C10	160810	223720	272250	301350	72497	84494	93936	100100															0.491044	0.591005	0.618981	0.623078
"	C11	155970	219330	254340	267150	79954	88857	96028	101860															0.549176	0.622323	0.654964	0.667828
"	C12	163720	228370	263570	291490	86362	97328	107110	109880															0.487376	0.594871	0.622442	0.618716
"	C13	159430	224660	260060	280080	83334	95194	104640	110340															0.472502	0.573814	0.593618	0.62304
"	C14	154040	216470	249700	269370	85176	96889	105390	111260															0.4773	0.576275	0.597631	0.606041
"	C15	153780	212820	243570	265710	76538	89375	98378	102630															0.447053	0.552414	0.577934	0.586962
"	C16	154450	217840	250790	282660	76835	89076	96424	100860															0.502289	0.580044	0.5961	0.613752
"	C17	163310	224390	259170	293750	68655	80759	88952	92084															0.502525	0.591094	0.615519	0.643176
"	C18	151100	204380	241160	263790	79205	88981	97170	103850															0.579603	0.640095	0.656781	0.686523
"	C19	146870	202430	235350	253270	70816	77479	83640	88538															0.475811	0.56463	0.597072	0.606316
"	C20	144410	199220	230020	247890	80016	90197	99831	104000															0.517832	0.617255	0.644614	0.65042
"	C21	134150	185520	215740	225380	70994	80339	87982	93513															0.445911	0.547249	0.56599	0.580459
"	C22	123020	173000	204140	215040	67595	75717	80123	86069															0.470786	0.566952	0.592185	0.585087
"	N3	119300	152720	176500	192300	62922	70028	77502	77219															0.450536	0.562329	0.60751	0.599754
"	N4	133480	165210	193790	227280	65784	73274	86375	85910															0.472573	0.541461	0.560895	0.598445
"	N5	137290	172530	200550	233060	74223	75156	86930	88079															0.507162	0.55648	0.554286	0.622008
"	N6	131690	164990	190350	217320	72190	74481	85899	86349															0.459371	0.564389	0.566542	0.622076
"	N7	134730	170760	197880	220480	83984	85417	96677	98212															0.451819	0.548573	0.548731	0.602664
"	N8	118630	157830	180390	195850	75370	75950	86856	89649															0.37665	0.499783	0.511436	0.554554
"	N9	118970	158200	187480	203290	71336	77772	88788	92324															0.364663	0.518786	0.51851	0.542257
"	N10	116620	154980	186170	215320	72674	83178	93127	91614															0.400387	0.508394	0.526413	0.545851
"	N11	111340	148900	174360	194770	74167	81016	91960	92720															0.376831	0.463298	0.499774	0.574522
"	N12	107130	148490	176050	195960	64306	71989	82959	84812															0.333869	0.455903	0.472585	0.523951
"	N13	98715	135260	159830	172130	62101	70484	79834	81279															0.399739	0.515193	0.528776	0.567197
"	N14	107700	141690	166770	177930	71416	80487	91254	91391															0.370906	0.4789	0.500507	0.527805
"	N15	103040	135840	161220	175750	63509	70789	80754	81752															0.336899	0.43195	0.452815	0.486365
"	N16	105710	139950	163280	174280	58103	66059	75464	79026															0.383647	0.47888	0.499107	0.534839
"	N17	117220	152850	179570	198420	74379	82733	94575	94788															0.450355	0.527981	0.537825	0.546557
"	N18	119320	150050	177720	196840	57103	63748	72113	76377															0.365475	0.458731	0.473325	0.522286
"	N19	118410	148650	175220	194160	66518	73032	83340	84247															0.52143	0.575155	0.594233	0.611984
"	N20	100770	130290	154750	168830	65014	71867	81174	83332															0.43824	0.508698	0.524369	0.566095
"	N21	88479	121100	142380	153250	55133	61089	68743	69579															0.354828	0.448407	0.475451	0.506415
"	N22	71443	107150	123910	130210	53179	59588	66667	68610															0.37688	0.495549	0.517186	0.545977
																								0.255644	0.443882	0.461972	0.473082
	Mean controls	133845	182488	212506	226445	74211.2	82602.4	91665.4	95007.4
																						STDEV (177Lu-lilotomab alone):		0.0703899	0.0543346	0.0567409	0.0501928
	Mean effect of Betalutin alone (F̅b)=1-(〖averageRLU〗_(177Lu-lilotomab)/〖averageRLU〗_control )					0.445545	0.547353	0.568645	0.58044													2xSTDEV (177Lu-lilotomab alone)		0.14078	0.108669	0.113482	0.100386

## Sheet: P2_100nM
P2_100nM		RAW DATA (RLU)
											Effect of drug alone (Fa) =1-(〖RLU〗_drug/〖averageRLU〗_control )						Expected value if additive effect (E) =Fa+F̅b-Fa*F̅b							Measured effect (M) =1-(〖RLU〗_combination/〖averageRLU〗_control )					Measured effect- Expected additive value (M-E)					Bliss score = (M-E)/(1-Fa)
		Minus_177Lu-lilotomab satetraxetan				Plus_177Lu-lilotomab satetraxetan											(Bliss Independence)
		Dy3	Dy4	Dy5	Dy6	Dy3	Dy4	Dy5	Dy6		Dy3	Dy4	Dy5	Dy6			Dy3	Dy4	Dy5	Dy6				Dy3	Dy4	Dy5	Dy6		Dy3	Dy4	Dy5	Dy6		Dy3	Dy4	Dy5	Dy6
Abitrexate (Methotrexate)	Sell 193	115840	181840	197490	216220	61116	78383	87060	91187		-0.038024	-0.184225	-0.172829	-0.287449			0.387691	0.404116	0.428053	0.35831				0.452349	0.489534	0.482979	0.457041		0.0646577	0.0854176	0.0549257	0.0987305		0.0622892	0.0721295	0.0468318	0.0766869
Aprepitant (MK-0869)	Sell 194	137640	206010	215070	229360	75996	87518	94129	97550		-0.23337	-0.341631	-0.277231	-0.365689			0.272461	0.324912	0.37714	0.319314				0.319012	0.430043	0.440998	0.419153		0.0465511	0.105131	0.0638583	0.0998394		0.037743	0.0783603	0.0499975	0.0731055
BKM120 (NVP-BKM120)	Sell 195	138780	203310	209690	228230	74819	93043	100690	103460		-0.243586	-0.324048	-0.245281	-0.358961			0.266435	0.33376	0.392721	0.322668				0.329559	0.394061	0.402035	0.383963		0.0631239	0.0603015	0.00931373	0.0612956		0.0507596	0.0455433	0.00747922	0.0451048
CAL-101 (GS-1101)	Sell 196	64329	122230	138930	157220	47446	70508	75159	76203		0.423558	0.203982	0.17494	0.0638575			0.659969	0.599456	0.597648	0.533408				0.574844	0.54082	0.553655	0.546261		-0.0851251	-0.0586367	-0.0439926	0.0128525		-0.147673	-0.0736626	-0.0533204	0.0137292
CUDC-101	Sell 197	13256	34004	42256	55108	7256	11641	12449	12878		0.881215	0.77855	0.749055	0.671868			0.929931	0.88857	0.877623	0.836453				0.93498	0.924188	0.926069	0.92332		0.00504886	0.0356184	0.0484462	0.0868674		0.0425043	0.160842	0.193055	0.264733
ENMD-2076	Sell 198	151090	206800	230500	258390	85907	99328	107810	107960		-0.353894	-0.346776	-0.368865	-0.538544			0.201366	0.322323	0.332454	0.23316				0.230201	0.353131	0.359751	0.357169		0.0288344	0.0308073	0.0272978	0.124009		0.0212974	0.0228748	0.0199419	0.0806014
Etoposide (VP-16)	Sell 199	115190	140210	143440	134060	35593	34340	31036	26067		-0.0321995	0.0868884	0.148156	0.20176			0.391127	0.540537	0.584586	0.602142				0.681057	0.776362	0.815687	0.844788		0.28993	0.235826	0.231101	0.242646		0.280885	0.258266	0.271295	0.303977
Gossypol	Sell 200	121390	175440	197380	204270	85561	99418	104430	106850		-0.0877567	-0.142545	-0.172176	-0.216294			0.358355	0.425089	0.428372	0.393775				0.233301	0.352545	0.379824	0.363778		-0.125054	-0.0725445	-0.0485477	-0.0299972		-0.114965	-0.0634937	-0.0414167	-0.0246628
Letrozole	Sell 201	121400	179500	203240	208530	76009	92627	99511	100670		-0.0878463	-0.168986	-0.206976	-0.24166			0.358302	0.411785	0.411401	0.381133				0.318895	0.396771	0.409036	0.400576		-0.039407	-0.0150139	-0.00236428	0.0194433		-0.0362248	-0.0128435	-0.00195885	0.0156591
LY2157299	Sell 202	119640	172860	195320	206360	70133	85394	91035	94486		-0.0720752	-0.125743	-0.159942	-0.228739			0.367605	0.433544	0.434338	0.387573				0.371549	0.443875	0.459373	0.437398		0.00394391	0.0103316	0.025035	0.049825		0.00367876	0.00917761	0.021583	0.0405497
Mocetinostat (MGCD0103)	Sell 203	71695	114570	133360	142450	35605	47239	49663	50383		0.357552	0.253868	0.208018	0.151803			0.621034	0.624558	0.613779	0.577242				0.680949	0.692358	0.705068	0.700002		0.0599156	0.0678001	0.0912888	0.12276		0.0932614	0.0908687	0.115266	0.14473
Paclitaxel (Taxol)	Sell 204	5741	5789	5147	4655	3593	3168	2625	2334		0.948556	0.962299	0.969434	0.972283			0.969654	0.98103	0.985094	0.986185				0.967804	0.979369	0.984411	0.986103		-0.00185045	-0.00166111	-0.000682901	-8.25129e-05		-0.0359701	-0.0440605	-0.0223416	-0.00297693
PH-797804	Sell 205	114970	164870	189770	205500	68755	83226	90555	95999		-0.0302281	-0.0737088	-0.126982	-0.223618			0.39229	0.459727	0.450411	0.390125				0.383897	0.457994	0.462223	0.428389		-0.0083928	-0.00173232	0.0118123	0.0382638		-0.00814655	-0.0016134	0.0104814	0.031271
Rapamycin (Sirolimus)	Sell 206	22307	25615	29127	33138	19030	20350	20285	20489		0.80011	0.833183	0.827024	0.802685			0.882089	0.916061	0.915646	0.901654				0.829475	0.867471	0.879534	0.878001		-0.0526142	-0.048589	-0.0361119	-0.0236529		-0.263216	-0.291272	-0.208769	-0.119874
Simvastatin (Zocor)	Sell 207	114280	165970	187770	197310	59262	77741	84037	87411		-0.0240451	-0.0808725	-0.115105	-0.174852			0.395937	0.456122	0.456203	0.414431				0.468963	0.493715	0.500932	0.479525		0.0730253	0.0375932	0.0447284	0.0650937		0.0713106	0.0347804	0.0401114	0.0554059
Tandutinib (MLN518)	Sell 208	122980	172040	195880	206790	70850	91604	99899	102900		-0.102004	-0.120403	-0.163268	-0.231299			0.349951	0.436231	0.432716	0.386296				0.365124	0.403433	0.406732	0.387298		0.0151736	-0.0327978	-0.0259836	0.00100124		0.0137691	-0.0292732	-0.0223368	0.000813155
Vinpocetine (Cavinton)	Sell 209	108320	158160	178850	186680	71149	92671	100980	104660		0.0293615	-0.0300102	-0.0621322	-0.111558			0.427441	0.481715	0.482036	0.445978				0.362445	0.396484	0.400313	0.376818		-0.0649957	-0.0852309	-0.0817236	-0.0691601		-0.0669618	-0.0827476	-0.076943	-0.0622191
WZ4002	Sell 210	128470	190120	210570	223110	87595	112880	117990	114070		-0.151199	-0.238148	-0.250507	-0.328474			0.320932	0.376983	0.390172	0.337863				0.215075	0.264874	0.299296	0.320788		-0.105857	-0.112109	-0.0908768	-0.0170749		-0.0919533	-0.090546	-0.072672	-0.012853
AR-A 014418	Sell 211	99553	147750	169360	172230	62528	79928	86026	88980		0.107921	0.0377845	-0.00577412	-0.0255172			0.473781	0.515828	0.50952	0.488862				0.439696	0.479472	0.489119	0.470182		-0.034085	-0.0363559	-0.0204004	-0.0186801		-0.0382085	-0.0377835	-0.0202833	-0.0182153
Combretastatin A4	Sell 212	8476	9901	7718	6015	7119	7791	6243	4790		0.924048	0.93552	0.954165	0.964185			0.955197	0.967555	0.977648	0.982149				0.936208	0.949261	0.962925	0.971479		-0.0189897	-0.0182933	-0.0147232	-0.0106702		-0.250022	-0.283706	-0.321224	-0.297923
JNK Inhibitor V	Sell 213	148470	216890	225250	242050	81999	95822	104300	108740		-0.330416	-0.412487	-0.337687	-0.44125			0.215215	0.289259	0.347658	0.281653				0.26522	0.375963	0.380596	0.352524		0.0500045	0.0867046	0.0329381	0.0708711		0.0375856	0.0613843	0.0246232	0.0491734
NU6027	Sell 214	148500	208850	222620	247430	75628	88115	95959	100880		-0.330685	-0.360127	-0.322068	-0.473284			0.215057	0.315606	0.355275	0.265687				0.322309	0.426155	0.430131	0.399325		0.107253	0.110549	0.0748559	0.133639		0.0805996	0.0812786	0.0566203	0.0907082
SecinH3	Sell 215	146330	208500	224630	234150	75595	88386	94838	97632		-0.31124	-0.357847	-0.334005	-0.39421			0.226527	0.316753	0.349454	0.305098				0.322605	0.42439	0.436788	0.418665		0.0960781	0.107637	0.0873343	0.113567		0.0732727	0.0792707	0.0654678	0.0814559
Streptozotocin (Zanosar)	Sell 216	144040	198890	220180	231050	69145	83176	87443	93160		-0.29072	-0.295263	-0.307578	-0.375752			0.238631	0.348244	0.362341	0.314299				0.380403	0.45832	0.480704	0.445293		0.141771	0.110076	0.118363	0.130994		0.109839	0.0849833	0.090521	0.0952167
ABT-888 (Veliparib)	Sell 217	133660	190060	210000	216210	77328	89371	93914	96289		-0.197706	-0.237758	-0.247122	-0.287389			0.293498	0.37718	0.391823	0.35834				0.307076	0.417975	0.442275	0.426662		0.0135777	0.0407954	0.050452	0.0683217		0.0113365	0.0329591	0.0404547	0.05307
AUY922 (NVP-AUY922)	Sell 218	3226	3575	3781	4138	1999	1913	1975	1996		0.971092	0.976718	0.977546	0.975361			0.982948	0.988285	0.98905	0.987719				0.982087	0.987542	0.988271	0.988115		-0.000860691	-0.000743176	-0.000778807	0.000395723		-0.0297738	-0.0319206	-0.0346843	0.0160608
BIBF1120 (Vargatef)	Sell 219	143420	202930	226890	237460	83551	98009	106840	104910		-0.285164	-0.321573	-0.347426	-0.413919			0.241909	0.335005	0.342908	0.295275				0.251313	0.361721	0.365512	0.375329		0.00940396	0.0267154	0.0226035	0.0800543		0.00731732	0.0202148	0.0167753	0.0566187
Celecoxib	Sell 220	120470	171850	194820	206870	69937	84758	92099	96558		-0.0795127	-0.119166	-0.156973	-0.231776			0.363218	0.436853	0.435786	0.386059				0.373306	0.448017	0.453054	0.42506		0.0100875	0.0111638	0.0172682	0.0390011		0.00934445	0.00997513	0.0149253	0.0316625
Cyclophosphamide monohydrate	Sell 221	106400	159890	181870	187040	77539	91668	96689	101710		0.0465663	-0.0412768	-0.080067	-0.113701			0.437589	0.476046	0.47329	0.44491				0.305185	0.403016	0.425795	0.394383		-0.132404	-0.0730298	-0.0474946	-0.0505264		-0.138871	-0.0701348	-0.0439737	-0.045368
Dorzolamide HCL	Sell 222	115330	168630	190900	198070	81755	95897	102940	105790		-0.033454	-0.0981956	-0.133693	-0.179378			0.390387	0.447405	0.447138	0.412175				0.267406	0.375475	0.388673	0.37009		-0.122981	-0.0719303	-0.0584656	-0.0420857		-0.119	-0.0654986	-0.0515709	-0.0356847
GDC-0941	Sell 223	44190	90798	113310	130770	52212	76736	86505	92289		0.60402	0.408682	0.327089	0.22135			0.76642	0.702458	0.671845	0.611906				0.532136	0.50026	0.486275	0.450479		-0.234283	-0.202198	-0.18557	-0.161426		-0.591655	-0.341944	-0.275772	-0.207316
GSK461364	Sell 224	6271	6010	5503	5182	6349	5456	4438	3214		0.943807	0.96086	0.967319	0.969145			0.966853	0.980305	0.984063	0.984621				0.943108	0.964468	0.973644	0.980863		-0.0237451	-0.0158374	-0.0104187	-0.00375833		-0.422559	-0.404636	-0.318805	-0.121804
KU-55933	Sell 225	120950	163570	188500	199890	74224	92290	100130	103730		-0.0838139	-0.0652426	-0.11944	-0.190214			0.360681	0.463987	0.454089	0.406774				0.33489	0.398965	0.40536	0.382356		-0.0257905	-0.0650213	-0.0487285	-0.0244184		-0.023796	-0.0610389	-0.0435294	-0.020516
MLN2238	Sell 226	91819	128020	153170	173510	38417	48164	55984	68938		0.177224	0.166275	0.090373	-0.0331388			0.514662	0.580483	0.556407	0.485064				0.655751	0.686334	0.667529	0.589519		0.141089	0.105851	0.111122	0.104456		0.17148	0.126962	0.122162	0.101105
Neratinib (HKI-272)	Sell 227	113220	163190	184890	191470	70659	88828	96806	97511		-0.0145466	-0.0627679	-0.0980018	-0.140079			0.40154	0.465232	0.464544	0.431763				0.366836	0.421511	0.425101	0.419386		-0.0347044	-0.0437204	-0.0394432	-0.0123769		-0.0342068	-0.0411382	-0.0359227	-0.0108562
PCI-32765 (Ibrutinib)	Sell 228	11461	14176	14298	13000	14302	15284	13599	11072		0.8973	0.907679	0.915089	0.922593			0.939419	0.953546	0.958592	0.961419				0.871842	0.900464	0.91924	0.934073		-0.0675773	-0.0530821	-0.0393519	-0.0273456		-0.658005	-0.574976	-0.463448	-0.353273
R935788 (Fostamatinib disodium)	Sell 229	118350	162850	186390	196180	65562	84735	92194	94628		-0.0605157	-0.0605536	-0.10691	-0.168124			0.374424	0.466346	0.4602	0.417784				0.412509	0.448167	0.45249	0.436552		0.0380852	-0.0181791	-0.00770994	0.0187676		0.035912	-0.0171411	-0.00696528	0.0160665
Rucaparib (AG-014699 , PF-01367338)	Sell 230	117280	156680	181700	182940	54975	70655	71686	72189		-0.0509276	-0.0203718	-0.0790574	-0.0892883			0.38008	0.486565	0.473782	0.457078				0.507378	0.539862	0.57428	0.570162		0.127298	0.0532974	0.100498	0.113084		0.121129	0.0522333	0.0931348	0.103815
Sodium butyrate	Sell 231	138970	206250	218920	230780	63479	78873	83234	85111		-0.245288	-0.343194	-0.300095	-0.374144			0.265431	0.324126	0.36599	0.3151				0.431175	0.486343	0.5057	0.49322		0.165744	0.162217	0.13971	0.17812		0.133097	0.12077	0.107461	0.129622
TG101348 (SAR302503)	Sell 232	149280	220750	237390	298110	88723	111260	119650	116360		-0.337675	-0.437625	-0.409782	-0.77505			0.210934	0.27661	0.3125	0.11528				0.204967	0.275424	0.289437	0.307152		-0.00596666	-0.00118567	-0.0230621	0.191872		-0.00446047	-0.00082474	-0.0163587	0.108094
Vandetanib (Zactima)	Sell 233	142010	207790	221910	242050	81707	95679	105500	108250		-0.272529	-0.353223	-0.317852	-0.44125			0.249362	0.319079	0.357331	0.281653				0.267836	0.376895	0.37347	0.355442		0.0184748	0.0578154	0.0161388	0.0737888		0.0145181	0.0427242	0.0122463	0.0511978
YO-01027	Sell 234	145850	208090	224130	239920	78356	92150	99095	102560		-0.306939	-0.355177	-0.331035	-0.428567			0.229064	0.318096	0.350902	0.287974				0.297864	0.399877	0.411507	0.389322		0.0688001	0.081781	0.0606053	0.101348		0.0526421	0.0603471	0.0455325	0.0709436
BD 1047	Sell 235	142410	188460	224400	244060	105800	124120	131270	132580		-0.276114	-0.227338	-0.332639	-0.453218			0.247247	0.382423	0.35012	0.275688				0.0519428	0.191674	0.22043	0.210573		-0.195305	-0.190749	-0.12969	-0.0651153		-0.153046	-0.155417	-0.0973179	-0.0448077
Elacridar	Sell 236	135060	193170	216010	244710	82211	91081	96968	100330		-0.210251	-0.258011	-0.282813	-0.457088			0.286098	0.366988	0.374418	0.273759				0.26332	0.406839	0.424138	0.4026		-0.0227779	0.0398505	0.0497207	0.128841		-0.0188208	0.0316774	0.0387591	0.0884239
L-NNA	Sell 237	120660	176040	193370	202720	79065	93922	99530	99089		-0.0812153	-0.146453	-0.148362	-0.207065			0.362214	0.423123	0.439985	0.398375				0.291511	0.388337	0.408924	0.40999		-0.0707028	-0.0347858	-0.0310614	0.0116145		-0.065392	-0.0303422	-0.0270485	0.00962207
SANT-1	Sell 238	129750	176730	202310	219520	78696	92103	101490	102550		-0.162669	-0.150947	-0.201453	-0.307098			0.314166	0.420862	0.414094	0.348517				0.294818	0.400183	0.397284	0.389382		-0.0193482	-0.0206786	-0.0168103	0.0408649		-0.0166412	-0.0179666	-0.0139916	0.0312638
SID 7969543	Sell 239	107490	160440	180690	191760	77550	88376	96497	98464		0.036799	-0.0448586	-0.0730593	-0.141806			0.431828	0.474244	0.476707	0.430902				0.305087	0.424455	0.426936	0.413711		-0.126741	-0.0497884	-0.0497717	-0.0171907		-0.131583	-0.0476509	-0.046383	-0.0150558
Ellagic acid	Sell 240	123490	173010	194010	204650	75589	92281	100680	102860		-0.106574	-0.12672	-0.152162	-0.218557			0.347255	0.433052	0.438132	0.392647				0.322659	0.399024	0.402094	0.387536		-0.0245961	-0.0340281	-0.0360374	-0.0051116		-0.0222272	-0.030201	-0.0312781	-0.0041948
ABT-263 (Navitoclax)	Sell 241	2606	3700	4133	4406	1833	2674	2887	2926		0.976648	0.975904	0.975455	0.973765			0.986225	0.987875	0.988031	0.986924				0.983575	0.982586	0.982855	0.982578		-0.0026504	-0.00528953	-0.00517546	-0.00434646		-0.113498	-0.219518	-0.21086	-0.165675
AR-42 (HDAC-42)	Sell 242	7237	14219	17304	19403	6812	10204	10602	10121		0.93515	0.907399	0.897237	0.884468			0.961747	0.953405	0.949886	0.942417				0.938959	0.933547	0.937038	0.939736		-0.0227878	-0.0198579	-0.0128481	-0.00268046		-0.351395	-0.214447	-0.125026	-0.0232009
BEZ235 (NVP-BEZ235)	Sell 243	30682	53091	71258	98541	31779	49256	63308	83266		0.725063	0.654247	0.576822	0.413253			0.837821	0.826023	0.793631	0.707554				0.715233	0.679222	0.624034	0.504205		-0.122587	-0.1468	-0.169597	-0.203348		-0.445875	-0.424581	-0.400769	-0.346569
Canagliflozin	Sell 244	111190	157720	178200	185310	68800	86462	94496	97772		0.00364389	-0.0271447	-0.058272	-0.1034			0.41227	0.483157	0.483919	0.450044				0.383494	0.43692	0.438819	0.417832		-0.0287764	-0.0462369	-0.0450997	-0.0322124		-0.0288817	-0.045015	-0.0426163	-0.0291938
cx-4945 (Silmitasertib)	Sell 245	106110	154850	174680	186600	65478	81383	86459	89264		0.049165	-0.00845398	-0.0373679	-0.111081			0.439122	0.492562	0.494113	0.446216				0.413262	0.469997	0.486548	0.468491		-0.0258604	-0.0225651	-0.00756473	0.0222756		-0.0271976	-0.0223759	-0.00729223	0.0200486
Entinostat (MS-275, SNDX-275)	Sell 246	79429	120210	139020	148800	44142	58311	62567	67974		0.288249	0.217138	0.174405	0.113993			0.580153	0.606076	0.597387	0.558397				0.60445	0.620252	0.628435	0.595259		0.0242973	0.0141762	0.0310479	0.0368622		0.0341374	0.0181082	0.0376067	0.0416049
Everolimus (RAD001)	Sell 247	21062	26697	29116	33456	18658	20697	20930	21336		0.811267	0.826137	0.82709	0.800791			0.88867	0.912515	0.915678	0.900711				0.832809	0.865212	0.875704	0.872958		-0.0558616	-0.0473032	-0.0399742	-0.0277525		-0.295982	-0.272071	-0.231184	-0.139314
GSK1120212 (Trametinib)	Sell 248	87821	127330	153710	175820	54991	78811	91774	99547		0.21305	0.170769	0.0871662	-0.0468933			0.535795	0.582744	0.554844	0.478208				0.507234	0.486747	0.454984	0.407263		-0.0285603	-0.0959971	-0.0998596	-0.0709454		-0.0362924	-0.115766	-0.109395	-0.0677676
Linifanib (ABT-869)	Sell 249	107450	153420	176730	185100	54119	70624	76470	81126		0.0371574	0.00085883	-0.0495422	-0.10215			0.432039	0.497248	0.488176	0.450667				0.515048	0.540064	0.545869	0.516948		0.0830088	0.0428164	0.0576937	0.0662804		0.0862122	0.0428532	0.0549703	0.0601374
LY2603618 (IC-83)	Sell 250	105760	150380	177100	183380	91921	120370	128870	126560		0.0523013	0.0206567	-0.0517395	-0.0919082			0.440972	0.50721	0.487104	0.455772				0.17631	0.216096	0.234683	0.246418		-0.264662	-0.291114	-0.252421	-0.209354		-0.279268	-0.297255	-0.240004	-0.191732
Motesanib Diphosphate	Sell 251	136110	205960	227210	243930	61383	71145	78215	81932		-0.21966	-0.341306	-0.349327	-0.452444			0.280548	0.325076	0.341982	0.276074				0.449957	0.536671	0.535506	0.512148		0.169409	0.211595	0.193525	0.236075		0.138898	0.157753	0.143423	0.162536
Pemetrexed	Sell 252	144260	211440	231840	258630	75377	86048	94896	99465		-0.292691	-0.376994	-0.376823	-0.539973			0.237469	0.307118	0.328573	0.232448				0.324559	0.439616	0.436443	0.407751		0.08709	0.132498	0.107871	0.175303		0.0673711	0.0962225	0.0783475	0.113835
PHA-665752	Sell 253	141900	207970	222820	244570	84117	94532	104200	104830		-0.271544	-0.354396	-0.323256	-0.456255			0.249943	0.318489	0.354695	0.274174				0.246241	0.384364	0.38119	0.375806		-0.00370232	0.0658751	0.0264945	0.101631		-0.00291167	0.048638	0.0200222	0.0697896
RG108	Sell 254	137370	197030	210950	224820	80926	93006	101620	103890		-0.230951	-0.283149	-0.252764	-0.338656			0.273888	0.354339	0.389072	0.332788				0.274835	0.394302	0.396512	0.381403		0.000946999	0.0399631	0.00743982	0.0486152		0.000769323	0.0311445	0.00593873	0.0363164
Sunitinib Malate (Sutent)	Sell 255	144490	201950	223170	250530	82921	96097	103250	106840		-0.294752	-0.315191	-0.325334	-0.491743			0.236253	0.338217	0.353682	0.256487				0.256958	0.374172	0.386832	0.363838		0.0207051	0.0359558	0.0331499	0.107351		0.0159916	0.0273388	0.0250125	0.0719635
Telatinib (BAY 57-9352)	Sell 256	135530	185310	204030	220770	76323	89635	98836	102350		-0.214463	-0.206823	-0.211668	-0.314541			0.283614	0.392745	0.409113	0.344807				0.316082	0.416256	0.413045	0.390573		0.0324679	0.0235105	0.00393222	0.0457654		0.0267343	0.0194813	0.0032453	0.0348148
TW-37	Sell 257	135130	185310	208750	227550	74328	88224	96283	98192		-0.210879	-0.206823	-0.239699	-0.354912			0.285728	0.392745	0.395443	0.324686				0.333958	0.425445	0.428206	0.415331		0.0482304	0.0326996	0.0327632	0.090645		0.0398309	0.0270956	0.0264283	0.0669011
XAV-939	Sell 258	122880	171580	191060	201390	64283	73958	80672	84718		-0.101108	-0.117407	-0.134643	-0.199146			0.350479	0.437738	0.446675	0.402322				0.42397	0.518352	0.520915	0.49556		0.0734909	0.0806136	0.0742402	0.0932373		0.0667426	0.0721434	0.0654304	0.0777531
BML-277	Sell 259	124030	168290	190820	198840	60775	74204	80401	83849		-0.111413	-0.0959814	-0.133218	-0.183962			0.344401	0.448519	0.44737	0.40989				0.455405	0.51675	0.522525	0.500734		0.111004	0.0682303	0.0751545	0.0908438		0.0998766	0.062255	0.0663195	0.0767286
cPEPCK inhibitor	Sell 260	122160	164780	185000	199260	72729	87494	95877	100620		-0.0946566	-0.0731227	-0.098655	-0.186463			0.354285	0.460021	0.464225	0.408644				0.348287	0.430199	0.430618	0.400874		-0.00599819	-0.0298224	-0.0336076	-0.0077701		-0.00547952	-0.0277903	-0.0305898	-0.00654896
JZL 184	Sell 261	129790	174360	195230	205830	63698	74139	80294	83886		-0.163028	-0.135512	-0.159408	-0.225583			0.313954	0.428628	0.434598	0.389145				0.429212	0.517173	0.52316	0.500514		0.115258	0.0885448	0.0885616	0.111368		0.0991016	0.0779779	0.0763853	0.0908695
Oxamflatin	Sell 262	36241	79479	95155	102600	30548	48722	51956	52685		0.67525	0.482396	0.434905	0.389084			0.808437	0.73955	0.724424	0.695508				0.726264	0.6827	0.69145	0.686295		-0.0821727	-0.0568499	-0.0329734	-0.00921237		-0.253034	-0.109833	-0.0583501	-0.0150796
SJ 172550	Sell 263	117930	157840	179020	192070	57070	73215	80215	86553		-0.0567522	-0.0279262	-0.0631417	-0.143651			0.376644	0.482764	0.481544	0.429982				0.488605	0.52319	0.523629	0.484633		0.111961	0.0404268	0.0420853	0.0546515		0.105948	0.0393285	0.0395858	0.0477868
Pomalidomide	Sell 264	120120	171260	190620	200790	62608	89929	95306	93514		-0.0763764	-0.115323	-0.13203	-0.195573			0.365068	0.438787	0.447949	0.404103				0.43898	0.414341	0.434009	0.443185		0.0739114	-0.0244455	-0.0139407	0.0390822		0.0686669	-0.0219179	-0.0123148	0.0326891
AEE788 (NVP-AEE788)	Sell 265	133920	179880	204910	226330	76568	89666	95056	99256		-0.200036	-0.171461	-0.216894	-0.347647			0.292124	0.410539	0.406564	0.328306				0.313886	0.416054	0.435493	0.408995		0.0217623	0.00551472	0.028929	0.080689		0.0181347	0.00470756	0.0237728	0.0598739
Axitinib	Sell 266	124560	165200	188160	200740	62633	79974	85531	86580		-0.116163	-0.0758579	-0.117421	-0.195276			0.341599	0.458645	0.455074	0.404251				0.438756	0.479173	0.492059	0.484473		0.0971564	0.0205276	0.0369855	0.0802212		0.0870451	0.0190802	0.033099	0.0671152
BIBR1532	Sell 267	105690	152640	170340	178990	63991	80830	87224	89437		0.0529285	0.00593855	-0.011594	-0.0657686			0.441342	0.499804	0.506682	0.4688				0.426587	0.473598	0.482005	0.467461		-0.0147557	-0.0262058	-0.0246768	-0.00133918		-0.0155803	-0.0263623	-0.024394	-0.00125654
CEP33779	Sell 268	115100	160090	179760	193950	67368	89198	96802	100530		-0.031393	-0.0425793	-0.0675364	-0.154846			0.391603	0.47539	0.479401	0.424403				0.396326	0.419102	0.425124	0.401409		0.00472304	-0.0562886	-0.0542764	-0.022993		0.00457929	-0.0539898	-0.0508426	-0.01991
Cyclosporin A (Cyclosporine A)	Sell 269	18450	36221	44297	46316	25117	35932	34205	28840		0.834672	0.764112	0.736934	0.724218			0.902477	0.881305	0.871712	0.862545				0.774931	0.765994	0.796868	0.828277		-0.127546	-0.115311	-0.0748448	-0.0342685		-0.771476	-0.488837	-0.28451	-0.12426
Dovitinib (TKI-258)	Sell 270	129050	166860	200010	221030	71648	92287	98852	98961		-0.156397	-0.0866686	-0.187795	-0.316089			0.317866	0.453205	0.420755	0.344036				0.357974	0.398985	0.41295	0.410752		0.0401077	-0.0542205	-0.00780504	0.0667163		0.0346834	-0.0498961	-0.00657103	0.0506929
Gefitinib (Iressa)	Sell 271	137710	204240	224660	248470	66101	79133	83619	84910		-0.233998	-0.330104	-0.334183	-0.479477			0.272091	0.330712	0.349367	0.2626				0.407679	0.48465	0.503414	0.494416		0.135589	0.153937	0.154047	0.231816		0.109878	0.115733	0.115462	0.156688
GSK690693	Sell 272	126540	184900	204940	225080	76409	90651	97652	98540		-0.133905	-0.204153	-0.217072	-0.340204			0.331133	0.394089	0.406477	0.332016				0.315311	0.409639	0.420076	0.413259		-0.0158222	0.0155503	0.013599	0.0812426		-0.0139538	0.0129139	0.0111736	0.0606195
KU-60019	Sell 273	143100	197270	216210	246090	85753	98716	106140	105310		-0.282297	-0.284712	-0.284001	-0.465305			0.2436	0.353553	0.373839	0.269663				0.231581	0.357116	0.369669	0.372948		-0.0120193	0.00356343	-0.00416961	0.103284		-0.00937324	0.00277372	-0.00324736	0.0704866
MLN8237 (Alisertib)	Sell 274	41943	68578	72642	67294	27447	29191	26117	21378		0.624155	0.553389	0.568603	0.599308			0.778297	0.775272	0.789623	0.800287				0.754052	0.809895	0.8449	0.872708		-0.0242454	0.0346227	0.0552766	0.0724206		-0.0645091	0.077523	0.128134	0.180739
Nilotinib (AMN-107)	Sell 275	125200	171610	183840	196560	71193	81198	85677	89717		-0.121898	-0.117603	-0.0917661	-0.170386			0.338216	0.43764	0.467585	0.416657				0.362051	0.471202	0.491192	0.465794		0.0238345	0.0335617	0.0236074	0.0491372		0.0212448	0.0300301	0.0216231	0.0419837
PD 0332991 HCl	Sell 276	128260	173500	191630	215750	80213	87941	96697	102090		-0.149318	-0.129911	-0.138028	-0.28465			0.322042	0.431446	0.445024	0.359705				0.281224	0.427288	0.425748	0.392121		-0.0408177	-0.00415834	-0.0192763	0.0324154		-0.0355147	-0.00368023	-0.0169384	0.0252329
Ranolazine (Ranexa)	Sell 277	123890	176010	195450	205350	78766	86332	93254	97667		-0.110159	-0.146258	-0.160714	-0.222725			0.345141	0.423221	0.433961	0.39057				0.29419	0.437767	0.446195	0.418457		-0.0509503	0.0145454	0.0122335	0.0278868		-0.0458946	0.0126895	0.0105397	0.0228071
Ruxolitinib (INCB018424)	Sell 278	127610	168600	189930	209420	81547	95341	105100	109550		-0.143493	-0.0980003	-0.127933	-0.246959			0.325477	0.447503	0.449948	0.378491				0.26927	0.379096	0.375845	0.347701		-0.0562072	-0.0684077	-0.0741024	-0.03079		-0.049154	-0.062302	-0.0656975	-0.024692
Sorafenib (Nexavar)	Sell 279	130670	164830	181050	188930	65301	67397	68293	69990		-0.170913	-0.0734483	-0.0751972	-0.124955			0.309303	0.459858	0.475665	0.439301				0.414848	0.56108	0.59443	0.583255		0.105545	0.101222	0.118765	0.143955		0.0901392	0.0942964	0.110459	0.127965
Trichostatin A (TSA)	Sell 280	38978	104830	130830	145790	16241	31072	36530	39770		0.650724	0.317299	0.223043	0.131916			0.79397	0.656476	0.621106	0.56733				0.854467	0.797645	0.78306	0.763196		0.0604974	0.141169	0.161954	0.195866		0.173208	0.206781	0.208447	0.22563
Vatalanib dihydrochloride (PTK787)	Sell 281	121670	163660	183940	195580	75019	85629	94513	96465		-0.0902657	-0.0658287	-0.09236	-0.164551			0.356875	0.463692	0.467295	0.419565				0.327767	0.442345	0.438718	0.425614		-0.0291086	-0.0213469	-0.0285771	0.00604885		-0.0266986	-0.0200284	-0.0261609	0.00519414
Zibotentan (ZD4054)	Sell 282	115370	159600	178210	187280	68311	79150	85175	90505		-0.0338124	-0.0393882	-0.0583314	-0.11513			0.390176	0.476996	0.48389	0.444197				0.387876	0.484539	0.494173	0.461102		-0.00229986	0.00754284	0.0102837	0.0169043		-0.00222464	0.007257	0.00971689	0.0151591
BI 78D3	Sell 283	120480	162260	182410	195120	64320	83408	89500	93232		-0.0796023	-0.0567113	-0.0832738	-0.161812			0.363165	0.468279	0.471726	0.42093				0.423639	0.456809	0.468489	0.444864		0.0604734	-0.0114705	-0.00323755	0.0239341		0.0560145	-0.0108549	-0.00298867	0.0206006
ICI 182,780	Sell 284	116360	156300	177650	193750	59566	72890	78800	83964		-0.0426837	-0.017897	-0.0550057	-0.153655			0.384943	0.48781	0.485511	0.424996				0.466238	0.525307	0.532032	0.500049		0.0812957	0.0374968	0.0465209	0.0750531		0.0779677	0.0368376	0.0440954	0.0650568
Lomeguatrib	Sell 285	114780	159650	181680	193810	66458	79939	86215	90232		-0.0285255	-0.0397138	-0.0789386	-0.154012			0.393294	0.476832	0.47384	0.424818				0.40448	0.479401	0.487997	0.462727		0.011186	0.00256836	0.0141569	0.0379094		0.0108757	0.00247026	0.0131211	0.0328501
SANT-2	Sell 286	65974	115420	131380	139860	41876	54040	55924	58146		0.408817	0.248332	0.219777	0.167225			0.651274	0.621773	0.619513	0.584929				0.624756	0.648067	0.667885	0.653779		-0.026518	0.0262943	0.0483725	0.0688498		-0.0448559	0.0349812	0.0619982	0.0826751
SK1-I	Sell 287	104710	152190	176470	189440	64266	80679	89990	93350		0.0617102	0.00886915	-0.0479981	-0.127992			0.446522	0.501278	0.488929	0.437787				0.424122	0.474581	0.465579	0.444162		-0.0224	-0.026697	-0.0233502	0.00637458		-0.0238732	-0.0269359	-0.0222808	0.00565126
FK-506 (Tacrolimus)	Sell 288	14797	31293	37567	36495	14556	21715	18590	14580		0.867406	0.796206	0.776902	0.782696			0.921786	0.897454	0.891203	0.891692				0.869566	0.858582	0.8896	0.913186		-0.0522198	-0.0388719	-0.00160295	0.0214941		-0.393834	-0.190741	-0.00718495	0.0989126
Anagrelide hydrochloride	Sell 289	87702	120650	148370	155730	51227	65744	70947	74258		0.214116	0.214272	0.118879	0.0727295			0.536424	0.604634	0.570309	0.53783				0.540963	0.571845	0.578669	0.557842		0.0045393	-0.032789	0.00836015	0.0200117		0.00577604	-0.0417307	0.00948808	0.0215813
AT-406	Sell 290	130400	188390	210480	236100	60725	69019	72829	76544		-0.168494	-0.226882	-0.249972	-0.405821			0.31073	0.382652	0.390433	0.299311				0.455853	0.550517	0.567492	0.54423		0.145123	0.167864	0.177059	0.244919		0.124197	0.136822	0.14165	0.174218
BI 2536	Sell 291	7051	6884	6083	5426	9103	6794	5233	4026		0.936817	0.955168	0.963875	0.967692			0.96273	0.977441	0.982383	0.983897				0.918429	0.955754	0.968923	0.976028		-0.0443003	-0.021687	-0.0134602	-0.00786912		-0.701144	-0.483742	-0.372602	-0.243564
Irinotecan HCl Trihydrate (Campto)	Sell 292	140450	178620	174820	166810	57499	53829	50703	43528		-0.25855	-0.163255	-0.0381993	0.00675535			0.257608	0.414668	0.493707	0.504948				0.484761	0.649441	0.698891	0.740819		0.227153	0.234773	0.205184	0.235872		0.180488	0.201824	0.197635	0.237476
CYC116	Sell 293	120820	174910	190830	207150	67229	78941	84538	86208		-0.082649	-0.139094	-0.133277	-0.233443			0.361368	0.426826	0.447341	0.385228				0.397571	0.4859	0.497956	0.486688		0.0362035	0.0590743	0.0506152	0.10146		0.0334397	0.0518608	0.0446626	0.0822572
Disulfiram (Antabuse)	Sell 294	136960	183320	202500	238990	88292	95352	102030	103090		-0.227277	-0.193864	-0.202582	-0.423029			0.276055	0.399267	0.413544	0.290734				0.208829	0.379024	0.394077	0.386166		-0.0672258	-0.0202423	-0.0194669	0.0954319		-0.0547763	-0.0169553	-0.0161876	0.0670625
Evista (Raloxifene Hydrochloride)	Sell 295	117650	166130	196460	240510	64121	79523	88013	92916		-0.0542432	-0.0819145	-0.166712	-0.43208			0.378124	0.455598	0.431036	0.286223				0.425422	0.48211	0.477319	0.446746		0.0472977	0.0265123	0.0462832	0.160522		0.0448642	0.024505	0.0396698	0.11209
GSK1904529A	Sell 296	88709	141600	160430	179880	69074	83718	87448	90471		0.205093	0.0778361	0.0472582	-0.071068			0.531101	0.535982	0.535382	0.466159				0.381039	0.45479	0.480675	0.461304		-0.150062	-0.0811915	-0.0547072	-0.00485466		-0.188779	-0.0880445	-0.0574208	-0.00453255
JNJ-7706621	Sell 297	118300	162140	182400	204540	57382	61411	65535	67279		-0.0600677	-0.0559298	-0.0832145	-0.217902			0.374688	0.468673	0.471755	0.392974				0.485809	0.600063	0.610809	0.599397		0.111121	0.131391	0.139054	0.206424		0.104824	0.124431	0.128371	0.169491
LY294002	Sell 298	107280	151490	174500	187440	64436	82507	88806	93102		0.0386808	0.0134279	-0.0362989	-0.116083			0.432938	0.503572	0.494634	0.443723				0.422599	0.462677	0.47261	0.445638		-0.0103388	-0.0408957	-0.0220241	0.00191573		-0.0107548	-0.0414523	-0.0212526	0.00171648
Mycophenolate mofetil (CellCept)	Sell 299	79936	120730	142460	162320	49767	64383	70234	77466		0.283706	0.213751	0.153976	0.0334904			0.577473	0.604372	0.587424	0.518273				0.554046	0.580708	0.582903	0.538741		-0.0234275	-0.0236634	-0.00452141	0.0204677		-0.0327065	-0.0300966	-0.00534431	0.0211769
Pazopanib	Sell 300	98502	144930	164250	180670	64906	81311	86226	87871		0.117339	0.0561496	0.0245725	-0.0757719			0.479337	0.525069	0.524319	0.463814				0.418388	0.470466	0.487932	0.476786		-0.0609493	-0.0546037	-0.0363871	0.0129712		-0.0690518	-0.057852	-0.0373038	0.0120575
PHA-793887	Sell 301	50699	100450	108580	104400	72567	89188	90165	81101		0.545694	0.345824	0.355179	0.378366			0.732015	0.670829	0.685544	0.690166				0.349739	0.419167	0.464539	0.517096		-0.382276	-0.251662	-0.221004	-0.173069		-0.841451	-0.3847	-0.342737	-0.27841
Roscovitine (Seliciclib, CYC202)	Sell 302	113760	161590	180930	194350	56884	70707	75830	78798		-0.0193855	-0.0523479	-0.0744846	-0.157227			0.398686	0.470475	0.476012	0.423215				0.490271	0.539524	0.54967	0.530809		0.0915855	0.0690487	0.073658	0.107594		0.0898439	0.0656139	0.0685519	0.0929756
TAE684 (NVP-TAE684)	Sell 303	133230	175220	225810	276630	89527	111560	121600	122970		-0.193853	-0.141113	-0.341012	-0.647151			0.295771	0.42581	0.346036	0.179028				0.197763	0.27347	0.277857	0.267794		-0.0980085	-0.15234	-0.0681792	0.088766		-0.0820943	-0.133501	-0.0508416	0.0538906
Temozolomide	Sell 304	100750	145100	162200	172980	56631	72553	79212	82481		0.0971951	0.0550425	0.0367468	-0.029983			0.467454	0.524512	0.530256	0.486636				0.492539	0.527502	0.529586	0.508879		0.0250842	0.00298951	-0.000670224	0.022243		0.0277847	0.00316364	-0.000695792	0.0215955
Ubenimex (Bestatin)	Sell 305	107050	150160	167670	187130	55361	70630	75108	77081		0.0407418	0.0220894	0.00426224	-0.114237			0.434154	0.507931	0.514414	0.444643				0.503919	0.540025	0.553958	0.541033		0.0697651	0.0320944	0.0395437	0.0963903		0.0727282	0.0328194	0.0397129	0.0865079
Estradiol	Sell 306	105770	148260	170180	184680	46448	59752	66128	69772		0.0522117	0.0344631	-0.0106438	-0.0996488			0.44092	0.514157	0.507145	0.451914				0.583787	0.610868	0.607287	0.584553		0.142867	0.0967107	0.100142	0.13264		0.150737	0.100163	0.0990875	0.12062
C 646	Sell 307	124300	179150	199510	211760	58245	68431	73353	75004		-0.113833	-0.166707	-0.184825	-0.260893			0.342973	0.412931	0.422203	0.371547				0.478076	0.554346	0.56438	0.5534		0.135102	0.141415	0.142177	0.181853		0.121295	0.121208	0.119998	0.144226
DFMO	Sell 308	123740	182160	202040	226380	78863	87041	94890	96730		-0.108815	-0.186309	-0.19985	-0.347945			0.345933	0.403068	0.414876	0.328158				0.293321	0.433149	0.436479	0.424036		-0.0526124	0.0300814	0.021603	0.095878		-0.0474492	0.0253571	0.0180048	0.071129
ML 141	Sell 309	133470	181470	203740	234490	65600	77619	85653	88079		-0.196004	-0.181816	-0.209946	-0.396235			0.294503	0.405329	0.409953	0.304089				0.412169	0.49451	0.491335	0.475547		0.117666	0.0891807	0.0813819	0.171458		0.0983828	0.0754607	0.0672608	0.1228
PB 28 dihydrochloride	Sell 310	107940	148590	172130	203350	81768	87503	97298	101940		0.0327666	0.032314	-0.0222243	-0.210816			0.429449	0.513076	0.501498	0.396506				0.26729	0.43014	0.422179	0.393014		-0.16216	-0.0829351	-0.079319	-0.00349169		-0.167653	-0.0857046	-0.0775946	-0.00288375
SKF 91488	Sell 311	115320	163740	182830	204860	82645	89842	98496	101040		-0.0333644	-0.0663497	-0.0857681	-0.219808			0.39044	0.46343	0.47051	0.392024				0.259431	0.414908	0.415064	0.398373		-0.131009	-0.0485217	-0.0554455	0.00634854		-0.126779	-0.0455026	-0.0510657	0.00520454
Pimecrolimus	Sell 312	34451	69305	78486	87815	40844	49841	47897	43212		0.69129	0.548654	0.533897	0.477119			0.817898	0.77289	0.772698	0.739386				0.634003	0.675413	0.715555	0.742701		-0.183895	-0.0974772	-0.057143	0.00331479		-0.595689	-0.21597	-0.122597	0.00633948
Afatinib (BIBW2992)	Sell 313	121750	176170	192960	211930	68170	78021	85449	91303		-0.0909826	-0.1473	-0.145927	-0.261905			0.356452	0.422697	0.441172	0.371042				0.389139	0.491892	0.492546	0.45635		0.0326871	0.0691947	0.0513737	0.0853081		0.0299612	0.060311	0.0448315	0.0676026
BAY 11-7082 (BAY 11-7821)	Sell 314	98178	147050	168210	189550	66804	81134	89280	91959		0.120242	0.0423432	0.00105535	-0.128647			0.481049	0.518122	0.51285	0.437461				0.40138	0.471618	0.469795	0.452444		-0.0796696	-0.0465038	-0.0430554	0.0149835		-0.0905585	-0.04856	-0.0431009	0.0132757
Bicalutamide (Casodex)	Sell 315	109330	153940	173250	181840	72408	85538	91201	95375		0.0203111	-0.00252765	-0.0288756	-0.0827385			0.422102	0.495544	0.498254	0.460342				0.351163	0.442937	0.458387	0.432104		-0.0709387	-0.0526064	-0.0398673	-0.028238		-0.0724095	-0.0524737	-0.0387484	-0.0260801
CH5132799	Sell 316	79069	128160	150200	161890	61287	86872	94544	96035		0.291475	0.165363	0.108011	0.0360507			0.582056	0.580024	0.565009	0.519549				0.450817	0.43425	0.438534	0.428174		-0.131239	-0.145774	-0.126475	-0.0913747		-0.185229	-0.174656	-0.14179	-0.094792
Decitabine	Sell 317	92819	145950	168570	179600	56229	68218	73158	78972		0.168264	0.0495069	-0.00108257	-0.0694008			0.509376	0.521727	0.511808	0.46699				0.496141	0.555733	0.565538	0.529773		-0.0132353	0.0340064	0.0537305	0.0627834		-0.0159129	0.0357777	0.0536724	0.058709
Febuxostat (Uloric)	Sell 318	93980	140960	162290	175670	64764	82475	90427	92411		0.15786	0.082004	0.0362123	-0.0460002			0.503239	0.538079	0.529995	0.478653				0.41966	0.462885	0.462983	0.449753		-0.0835793	-0.0751937	-0.0670118	-0.0289004		-0.0992463	-0.0819107	-0.0695297	-0.0276294
GW 4064	Sell 319	101310	144040	163450	172060	53319	68751	75127	77521		0.092177	0.0619457	0.0293234	-0.024505			0.464494	0.527986	0.526636	0.489367				0.522217	0.552262	0.553845	0.538413		0.0577226	0.0242763	0.0272094	0.0490462		0.0635835	0.0258794	0.0280313	0.0478731
KX2-391	Sell 320	26101	44764	54541	66408	18650	24658	23130	19933		0.766113	0.708476	0.676099	0.604584			0.862035	0.85331	0.842045	0.802917				0.83288	0.839416	0.862638	0.881312		-0.0291547	-0.013894	0.0205935	0.0783952		-0.124653	-0.0476601	0.0635796	0.19826
Megestrol Acetate	Sell 321	106330	150020	173420	192550	56127	73419	80023	82580		0.0471936	0.0230012	-0.0298851	-0.14651			0.437959	0.50839	0.497762	0.428557				0.497055	0.521862	0.524769	0.50829		0.0590953	0.0134724	0.0270075	0.0797326		0.0620224	0.0137896	0.0262238	0.0695438
Nocodazole	Sell 322	5855	6829	7291	7906	4934	4915	4434	3599		0.947534	0.955526	0.956701	0.952925			0.969052	0.977622	0.978885	0.976537				0.955787	0.967991	0.973668	0.97857		-0.0132644	-0.00963032	-0.00521677	0.00203343		-0.25282	-0.21654	-0.120483	0.0431955
PD0325901	Sell 323	90334	134780	165110	199700	49998	71827	82099	89567		0.190531	0.122251	0.0194652	-0.189083			0.522511	0.55833	0.521828	0.407338				0.551976	0.53223	0.512441	0.466687		0.0294644	-0.0261007	-0.00938759	0.0593491		0.0363997	-0.029736	-0.00957395	0.0499117
PIK-90	Sell 324	100720	146880	165760	176010	57759	72139	75646	75355		0.0974639	0.0434503	0.0156051	-0.0480246			0.467613	0.518679	0.519946	0.477644				0.482431	0.530198	0.550763	0.55131		0.0148178	0.0115187	0.0308171	0.073666		0.0164179	0.0120419	0.0313057	0.0702903
Salinomycin (Procoxacin)	Sell 325	95516	134180	156500	174530	57906	74006	81278	83683		0.144096	0.126159	0.0705972	-0.0392122			0.49512	0.560297	0.546763	0.482036				0.481113	0.518039	0.517316	0.501722		-0.0140068	-0.0422576	-0.0294472	0.0196859		-0.016365	-0.0483584	-0.031684	0.0189431
Sotrastaurin (AEB071)	Sell 326	93454	134540	159850	178740	46437	60040	66167	68646		0.162573	0.123814	0.0507027	-0.06428			0.50602	0.559117	0.537062	0.469542				0.583885	0.608992	0.607056	0.591258		0.0778657	0.0498751	0.069994	0.121716		0.0929822	0.056923	0.0737324	0.114364
Triptolide	Sell 327	10396	10108	7185	5572	6531	5074	3605	2688		0.906843	0.934172	0.957331	0.966822			0.945049	0.966876	0.979192	0.983464				0.941477	0.966956	0.978591	0.983995		-0.00357195	7.9368e-05	-0.000600592	0.000531086		-0.0383434	0.00120569	-0.0140755	0.0160074
Vemurafenib (PLX4032)	Sell 328	137360	185160	205270	225900	63356	71984	77684	79900		-0.230861	-0.205847	-0.219032	-0.345087			0.273941	0.393237	0.405522	0.329583				0.432277	0.531207	0.53866	0.524248		0.158336	0.13797	0.133138	0.194665		0.128638	0.114418	0.109216	0.144723
Zileuton	Sell 329	129580	183460	199700	222230	66974	77397	84911	86942		-0.161146	-0.194775	-0.185954	-0.323235			0.315064	0.398808	0.421653	0.340474				0.399857	0.495955	0.495741	0.482317		0.0847922	0.0971476	0.0740883	0.141843		0.0730246	0.0813103	0.0624715	0.107194
BIBR 1532	Sell 330	132060	183280	198510	229100	67061	76521	83796	86685		-0.183369	-0.193603	-0.178887	-0.364141			0.301956	0.399398	0.425099	0.320086				0.399077	0.50166	0.502363	0.483847		0.0971214	0.102263	0.0772635	0.163762		0.082072	0.0856756	0.0655394	0.120048
GANT 61	Sell 331	123510	167100	185370	204670	65129	75926	83517	86100		-0.106754	-0.0882316	-0.100852	-0.218676			0.347149	0.452419	0.463154	0.392588				0.416389	0.505535	0.50402	0.487331		0.0692401	0.0531163	0.0408659	0.0947426		0.0625614	0.0488097	0.0371221	0.0777422
LY 320135	Sell 332	120800	164780	182830	201650	67934	76379	83085	86775		-0.0824698	-0.0731227	-0.0857681	-0.200694			0.361474	0.460021	0.47051	0.401551				0.391254	0.502585	0.506585	0.483312		0.0297803	0.0425635	0.0360754	0.0817608		0.0275115	0.0396633	0.0332257	0.0680946
PF-4708671	Sell 333	118300	166840	182990	200220	56879	69056	77118	81667		-0.0600677	-0.0865383	-0.0867183	-0.192179			0.374688	0.453271	0.470046	0.405795				0.490316	0.550276	0.542021	0.513726		0.115628	0.0970048	0.0719749	0.107932		0.109076	0.0892788	0.0662314	0.0905331
SKI II	Sell 334	142790	194000	236270	263630	93925	107800	117190	118750		-0.279519	-0.263417	-0.403131	-0.569745			0.245239	0.364269	0.315743	0.217609				0.158353	0.297957	0.304047	0.292921		-0.0868859	-0.0663114	-0.0116966	0.0753124		-0.0679051	-0.0524858	-0.00833608	0.0479775
Tofacitinib citrate (CP-690550 citrate)	Sell 335	112460	153240	176500	193550	69267	86833	95144	97636		-0.00773638	0.00203107	-0.0481763	-0.152464			0.405557	0.497838	0.488842	0.42559				0.379309	0.434504	0.434971	0.418641		-0.0262481	-0.0633339	-0.0538713	-0.00694825		-0.0260466	-0.0634628	-0.0513952	-0.00602904
Anastrozole	Sell 336	117120	157570	179240	196560	64397	75849	80297	84073		-0.0494939	-0.0261679	-0.0644482	-0.170386			0.380926	0.483648	0.480907	0.416657				0.422949	0.506037	0.523142	0.4994		0.0420231	0.0223882	0.0422355	0.0827435		0.0400413	0.0218173	0.0396783	0.0706976
AT7519	Sell 337	126190	168960	199520	239310	55460	66053	73138	78511		-0.130769	-0.100345	-0.184885	-0.424935			0.332983	0.446324	0.422174	0.289785				0.503032	0.569833	0.565657	0.532518		0.170048	0.123509	0.143483	0.242733		0.150383	0.112246	0.121094	0.170347
BI6727 (Volasertib)	Sell 338	6359	5840	5170	4855	6862	5489	4189	3189		0.943018	0.961967	0.969297	0.971092			0.966388	0.980863	0.985027	0.985592				0.938511	0.964253	0.975123	0.981012		-0.0278768	-0.0166094	-0.00990438	-0.00457993		-0.489221	-0.436713	-0.322587	-0.158429
CP-466722	Sell 339	114680	161150	180840	192030	51893	64742	70934	74053		-0.0276295	-0.0494825	-0.0739501	-0.143413			0.393823	0.471917	0.476273	0.430101				0.534995	0.578371	0.578746	0.559063		0.141172	0.106454	0.102473	0.128962		0.137376	0.101434	0.095417	0.112787
Cyclopamine	Sell 340	109930	151620	173800	189980	60970	66011	74258	78917		0.0149346	0.0125813	-0.0321418	-0.131207			0.418931	0.503146	0.496661	0.436185				0.453657	0.570106	0.559006	0.530101		0.0347269	0.0669598	0.0623445	0.0939163		0.0352534	0.067813	0.060403	0.0830231
Docetaxel (Taxotere)	Sell 341	5686	5544	5208	4834	3636	3202	2465	2181		0.949049	0.963895	0.969071	0.971217			0.969945	0.981832	0.984917	0.985654				0.967418	0.979147	0.985361	0.987014		-0.00252649	-0.00268539	0.000443948	0.00135973		-0.0495863	-0.074377	0.014354	0.0472403
EX 527	Sell 342	115740	153690	180870	207900	56133	68376	69915	70956		-0.0371279	-0.000899533	-0.0741283	-0.237909			0.38822	0.496363	0.476186	0.383002				0.497001	0.554704	0.584797	0.577503		0.108781	0.0583412	0.108611	0.194501		0.104887	0.0582888	0.101116	0.157121
GSK2126458	Sell 343	11413	11477	9576	7978	7019	5653	4974	4197		0.89773	0.925257	0.943131	0.952496			0.939673	0.96239	0.972267	0.976323				0.937104	0.963185	0.970461	0.97501		-0.00256917	0.000794822	-0.00180611	-0.00131359		-0.0251214	0.010634	-0.0317593	-0.0276523
Ku-0063794	Sell 344	99976	134860	160440	181110	58551	68722	75792	79018		0.104131	0.12173	0.0471989	-0.0783918			0.471546	0.558068	0.535353	0.462509				0.475334	0.552451	0.549896	0.529499		0.00378816	-0.0056174	0.0145429	0.0669908		0.00422847	-0.00639599	0.0152634	0.062121
Maraviroc	Sell 345	100400	140280	163860	176880	50788	62488	69505	69887		0.100331	0.0864325	0.0268886	-0.0532049			0.469304	0.540307	0.525448	0.475062				0.544897	0.59305	0.587232	0.583869		0.0755924	0.0527424	0.061784	0.108806		0.0840225	0.0577324	0.0634912	0.10331
Mycophenolic (Mycophenolate)	Sell 346	65957	97893	120640	134100	32128	43126	44411	43876		0.40897	0.362476	0.283558	0.201522			0.651364	0.679208	0.650617	0.602023				0.712106	0.719144	0.736257	0.738747		0.0607424	0.0399358	0.0856406	0.136724		0.102774	0.0626421	0.119536	0.171231
PCI-24781	Sell 347	67899	108250	125320	141470	8278	11546	11570	10333		0.391568	0.295027	0.255765	0.157639			0.641099	0.645268	0.637063	0.580151				0.925822	0.924807	0.93129	0.938474		0.284724	0.279539	0.294226	0.358323		0.467963	0.396524	0.395341	0.425379
Phloretin (Dihydronaringenin)	Sell 348	122630	165360	183180	199640	63950	73463	78786	80521		-0.0988682	-0.0768999	-0.0878466	-0.188726			0.351801	0.458121	0.469496	0.407516				0.426954	0.521575	0.532115	0.52055		0.0751534	0.0634545	0.0626194	0.113034		0.0683916	0.0589233	0.0575627	0.0950884
Rosiglitazone (Avandia)	Sell 349	126180	166760	184540	204700	68994	76164	78746	80028		-0.130679	-0.0860173	-0.0959232	-0.218855			0.333036	0.453533	0.465557	0.392499				0.381756	0.503985	0.532353	0.523486		0.0487195	0.0504521	0.0667956	0.130986		0.0430887	0.0464561	0.0609492	0.107467
SNS-314	Sell 350	110460	146140	145700	127840	68209	79686	82293	67815		0.0101853	0.0482695	0.134735	0.238796			0.416129	0.521104	0.578041	0.620601				0.38879	0.481048	0.511289	0.596206		-0.0273392	-0.0400558	-0.0667526	-0.0243953		-0.0276205	-0.0420873	-0.077147	-0.0320484
Temsirolimus (Torisel)	Sell 351	22039	26140	28095	31637	17233	18031	19300	18928		0.802512	0.829764	0.833153	0.811622			0.883506	0.91434	0.918635	0.906109				0.845578	0.882574	0.885384	0.887296		-0.0379282	-0.0317662	-0.0332511	-0.0188128		-0.192053	-0.186601	-0.199291	-0.0998674
Valproic acid sodium salt (Sodium valproate)	Sell 352	107900	153190	169240	184650	59245	70837	76920	80155		0.0331251	0.0023567	-0.00506148	-0.0994702			0.429661	0.498002	0.509867	0.452003				0.469115	0.538677	0.543197	0.522729		0.0394541	0.0406755	0.0333296	0.0707266		0.0408058	0.0407716	0.0331618	0.0643279
YM201636	Sell 353	101380	150460	163990	174340	51241	66622	74455	78476		0.0915498	0.0201357	0.0261166	-0.0380809			0.464124	0.506948	0.525072	0.4826				0.540837	0.566127	0.557836	0.532727		0.0767132	0.0591794	0.032764	0.0501263		0.084444	0.0603955	0.0336427	0.0482875
Bay 11-7085	Sell 354	121550	163230	182770	200630	61122	74779	82836	84838		-0.0891904	-0.0630284	-0.0854118	-0.194621			0.357509	0.465101	0.470683	0.404578				0.452295	0.513005	0.508064	0.494845		0.094786	0.0479042	0.0373804	0.0902672		0.0870242	0.0450639	0.0344389	0.0755614
EBPC	Sell 355	105550	146200	165050	176100	60793	68688	72921	74110		0.054183	0.0478788	0.0198216	-0.0485605			0.442082	0.520908	0.522002	0.477377				0.455243	0.552672	0.566946	0.558723		0.0131611	0.0317648	0.0449438	0.0813463		0.013915	0.0333622	0.0458527	0.077579
MRT-10	Sell 356	101010	146520	167700	181400	48881	63067	69375	72548		0.0948653	0.0457948	0.00408408	-0.0801186			0.46608	0.519859	0.514327	0.461648				0.561985	0.589279	0.588004	0.568024		0.095905	0.06942	0.073677	0.106376		0.105957	0.0727516	0.0739791	0.0984856
PD 166285	Sell 357	60521	82692	103360	131080	56336	80887	100120	119810		0.457681	0.461472	0.386178	0.219504			0.680097	0.729021	0.700661	0.610986				0.495182	0.473227	0.40542	0.28661		-0.184915	-0.255794	-0.295241	-0.324376		-0.340971	-0.474988	-0.480989	-0.415603
Src I1	Sell 358	114400	152970	172250	191930	52874	66477	74724	80408		-0.0251204	0.00378944	-0.0229369	-0.142818			0.395303	0.498722	0.50115	0.430397				0.526204	0.567071	0.556238	0.521223		0.130901	0.0683489	0.0550882	0.0908255		0.127694	0.0686089	0.0538529	0.079475
Apatinib (YN968D1)	Sell 359	120990	158720	182530	205450	56109	67689	74872	79863		-0.0841724	-0.0336572	-0.0839865	-0.223321			0.360469	0.47988	0.471379	0.390273				0.497216	0.559178	0.555359	0.524468		0.136747	0.0792984	0.0839809	0.134195		0.12613	0.0767163	0.0774742	0.109697
AG14361	Sell 360	113400	147440	167940	182680	46306	54968	58232	57567		-0.0161596	0.0398033	0.00265879	-0.0877401			0.400589	0.516844	0.513632	0.457849				0.585059	0.642023	0.654179	0.657226		0.18447	0.125179	0.140547	0.199377		0.181537	0.130368	0.140921	0.183295
Belinostat (PXD101)	Sell 361	12929	26065	30623	34216	7375	10016	10443	9298		0.884145	0.830253	0.81814	0.796266			0.93166	0.914586	0.911313	0.898455				0.933914	0.934771	0.937982	0.944636		0.00225406	0.0201854	0.0266691	0.0461814		0.0194559	0.118914	0.146646	0.226675
BIIB021	Sell 362	109680	146580	167360	185590	59077	66232	70071	67642		0.0171748	0.045404	0.00610323	-0.105067			0.420252	0.519662	0.515312	0.449213				0.47062	0.568667	0.583871	0.597236		0.0503683	0.0490047	0.068559	0.148023		0.0512485	0.0513355	0.06898	0.133949
CHIR-99021 (CT99021) HCl	Sell 363	111670	150820	175720	194750	60788	71222	78073	77099		-0.000657315	0.0177912	-0.0435441	-0.159609			0.409733	0.505768	0.491101	0.422028				0.455288	0.53617	0.53635	0.540926		0.0455551	0.0304018	0.0452489	0.118897		0.0455251	0.0309525	0.0433608	0.102532
Dexamethasone	Sell 364	121410	161390	193480	220330	71251	87694	98132	98461		-0.0879359	-0.0510455	-0.149015	-0.311921			0.358249	0.47113	0.439666	0.346113				0.361531	0.428897	0.417226	0.413729		0.00328157	-0.0422338	-0.0224406	0.0676161		0.00301633	-0.0401827	-0.0195303	0.0515397
Doxorubicin (Adriamycin)	Sell 365	42427	31600	21582	14334	14618	11046	8102	5302		0.619818	0.794206	0.871831	0.91465			0.775739	0.896448	0.937497	0.95746				0.86901	0.928063	0.951885	0.96843		0.0932716	0.0316155	0.014388	0.01097		0.245334	0.153627	0.112259	0.12853
Fingolimod (FTY720)	Sell 366	129420	173500	190050	206780	71011	84848	88636	86591		-0.159712	-0.129911	-0.128645	-0.23124			0.31591	0.431446	0.4496	0.386326				0.363682	0.447431	0.47362	0.484407		0.0477715	0.0159847	0.0240195	0.098081		0.0411926	0.0141469	0.0212817	0.0796604
JNJ 26854165 (Serdemetan)	Sell 367	136800	174270	210210	213570	98186	113720	121620	118530		-0.225843	-0.134926	-0.248369	-0.27167			0.276901	0.428923	0.391215	0.366175				0.120171	0.259403	0.277738	0.294231		-0.15673	-0.16952	-0.113477	-0.0719438		-0.127855	-0.149366	-0.0909	-0.0565743
LDE225 (NVP-LDE225, Erismodegib)	Sell 368	135390	174620	192480	211190	68769	79450	87248	89019		-0.213209	-0.137205	-0.143076	-0.257499			0.284354	0.427776	0.442563	0.373238				0.383772	0.482585	0.481862	0.46995		0.0994181	0.0548091	0.0392999	0.0967117		0.0819464	0.0481963	0.0343808	0.076908
Melphalan	Sell 369	140500	180480	196070	212390	70836	79901	85564	84946		-0.258998	-0.175368	-0.164396	-0.264644			0.257343	0.408573	0.432166	0.369677				0.36525	0.479648	0.491863	0.494202		0.107906	0.071075	0.0596975	0.124525		0.0857082	0.0604704	0.0512691	0.0984665
Palomid 529	Sell 370	119820	163150	177760	187700	75790	85256	91933	91789		-0.0736882	-0.0625074	-0.055659	-0.117631			0.366654	0.465363	0.485193	0.442951				0.320858	0.444774	0.45404	0.453456		-0.0457961	-0.020589	-0.0311531	0.0105054		-0.0426531	-0.0193777	-0.0295106	0.00939971
PD153035 HCl	Sell 371	122080	162420	181750	195930	72653	79559	86403	89525		-0.0939397	-0.0577533	-0.0793543	-0.166635			0.354708	0.467755	0.473637	0.418526				0.348968	0.481875	0.486881	0.466937		-0.00574003	0.0141203	0.0132431	0.0484107		-0.00524712	0.0133493	0.0122695	0.041496
PIK-93	Sell 372	120200	163730	185270	200360	76168	81289	93022	95067		-0.0770933	-0.0662846	-0.100258	-0.193013			0.364645	0.463462	0.463443	0.405379				0.317471	0.470609	0.447573	0.433938		-0.0471747	0.00714657	-0.0158708	0.0285589		-0.0437982	0.00670231	-0.0144246	0.0239385
Sirtinol	Sell 373	111860	154030	169890	184570	62906	73292	78187	79102		-0.00235988	-0.00311377	-0.00892162	-0.0989939			0.408729	0.495249	0.507985	0.45224				0.436309	0.522689	0.535673	0.528999		0.0275803	0.0274401	0.0276878	0.0767591		0.0275154	0.0273549	0.0274429	0.0698449
SRT1720	Sell 374	115700	156620	175280	200400	64959	74783	81489	81580		-0.0367695	-0.019981	-0.0409311	-0.193251			0.388431	0.486762	0.492375	0.40526				0.417913	0.512979	0.516063	0.514244		0.0294812	0.0262174	0.0236881	0.108984		0.0284356	0.0257038	0.0227567	0.0913336
Tivozanib (AV-951)	Sell 375	101760	137620	155680	167720	62685	71419	77958	79523		0.0881446	0.103756	0.075467	0.00133689			0.462116	0.549024	0.549138	0.502247				0.43829	0.534887	0.537033	0.526492		-0.0238261	-0.0141371	-0.0121056	0.0242455		-0.0261292	-0.0157737	-0.0130937	0.024278
Vinblastine	Sell 376	50683	85641	102140	111380	47556	54893	57485	55832		0.545838	0.442267	0.393424	0.336805			0.732099	0.719357	0.704194	0.669451				0.573858	0.642512	0.658615	0.667557		-0.158241	-0.0768456	-0.0455792	-0.00189375		-0.348424	-0.137782	-0.0751417	-0.00285549
ZSTK474	Sell 377	19730	33410	39455	47393	26397	33991	36789	40174		0.823203	0.782419	0.76569	0.717806			0.895711	0.890517	0.885735	0.859349				0.763461	0.778635	0.781522	0.76079		-0.13225	-0.111881	-0.104213	-0.0985588		-0.748033	-0.514206	-0.444765	-0.349259
BIX 01294	Sell 378	88242	124110	140640	148300	59237	68721	72592	73081		0.209277	0.191739	0.164785	0.11697			0.533569	0.593296	0.592695	0.559881				0.469187	0.552457	0.5689	0.56485		-0.0643827	-0.0408383	-0.0237957	0.0049695		-0.0814226	-0.0505261	-0.0284905	0.00562778
GSK 264220A	Sell 379	108440	139320	159630	174150	54580	61690	67233	71530		0.0282862	0.0926845	0.0520092	-0.0369496			0.426806	0.543453	0.537699	0.483164				0.510917	0.598247	0.600725	0.574086		0.0841108	0.0547935	0.0630262	0.0909213		0.0865592	0.0603908	0.066484	0.0876816
LY 333531	Sell 380	107020	138240	160030	174370	59990	70717	75115	76377		0.0410106	0.0997179	0.0496337	-0.0382595			0.434312	0.546992	0.53654	0.482511				0.462439	0.539459	0.553916	0.545225		0.0281268	-0.00753361	0.017376	0.0627135		0.0293296	-0.00836805	0.0182835	0.0604026
PIM-1 Inhibitor 2	Sell 381	98690	128900	147720	160080	61287	71234	80160	82849		0.115654	0.160544	0.122739	0.0468281			0.478343	0.577599	0.572191	0.524921				0.450817	0.536092	0.523956	0.506688		-0.0275263	-0.0415074	-0.0482353	-0.0182323		-0.0311261	-0.0494456	-0.054984	-0.0191281
STAT5 Inhibitor	Sell 382	96175	123130	143440	154180	55868	63206	72736	75189		0.138191	0.198121	0.148156	0.0819588			0.491637	0.596507	0.584586	0.54243				0.499376	0.588374	0.568044	0.552299		0.00773872	-0.0081335	-0.0165418	0.00986818		0.00897962	-0.0101431	-0.0194188	0.0107492
Azithromycin (Zithromax)	Sell 383	105860	133820	154970	170140	55855	63608	71356	73679		0.0514052	0.128503	0.0796834	-0.0130726			0.440444	0.561476	0.551194	0.495065				0.499492	0.585756	0.57624	0.56129		0.0590483	0.0242793	0.0250454	0.0662247		0.0622482	0.0278593	0.0272138	0.0653702
Doxercalciferol (Hectorol)	Sell 384	104370	134010	151080	157270	59157	69133	73517	72128		0.0647568	0.127266	0.102785	0.0635598			0.44832	0.560854	0.56246	0.53326				0.469903	0.549774	0.563406	0.570525		0.0215837	-0.0110794	0.000946126	0.0372648		0.0230782	-0.0126951	0.00105451	0.0397941
control (no drug)	D12	110840	158350	177320	182620	74495	91383	99076	101600															Effect of 177Lu-lilotomab alone in each control well
"	E4	148150	205320	212520	222590	83112	94717	101660	102210															0.327905	0.422905	0.441259	0.443653
"	H12	126530	167820	187740	207050	68063	75962	82473	87395															0.439001	0.538686	0.521645	0.540815
"	I7	128620	167570	184900	206300	86276	90429	96495	99314															0.46208	0.54736	0.560706	0.577904
"	I18	93865	136860	160900	180180	57190	68546	70214	73876															0.329218	0.460351	0.478123	0.518594
"	I22	80879	119000	133300	137220	42990	53622	53807	53584															0.390721	0.499152	0.563617	0.589988
"	L4	124330	163280	180460	188000	65284	77406	82510	84653															0.468465	0.549395	0.596347	0.609503
"	M15	92183	122650	141580	148470	51103	57663	62259	66285															0.474914	0.525931	0.54278	0.549718
"																								0.445635	0.529857	0.560256	0.553546
"	C3	142190	197930	203630	206220	67042	81295	82778	84615
"	C4	150910	213280	214340	222580	73755	86511	93057	93990															0.528504	0.589274	0.593488	0.589686
"	C5	156800	217810	216720	229360	88082	98092	102600	104180															0.511265	0.594378	0.565844	0.577725
"	C6	156900	215350	223450	239580	90470	102800	108340	107410															0.438253	0.549644	0.526578	0.54578
"	C7	140800	192300	206050	212360	89710	99855	103650	105400															0.423391	0.522638	0.515149	0.551674
"	C8	145300	192090	209900	218480	88301	102710	109780	109920															0.362855	0.480733	0.496967	0.503673
"	C9	146190	201140	217580	221240	81398	98080	103110	103440															0.392285	0.465303	0.476989	0.496888
"	C10	120740	169260	187580	193080	75373	89327	96691	98959															0.443204	0.512379	0.526105	0.532453
"	C11	122710	168210	186540	192890	83929	97996	102020	102720															0.375741	0.47225	0.484535	0.487472
"	C12	116660	161710	179410	183380	77667	93942	99252	99023															0.316038	0.417419	0.453093	0.467469
"	C13	117650	169050	186450	186960	74575	90993	97419	99705															0.334245	0.419071	0.446787	0.460012
"	C14	119720	165080	182790	185240	76716	93682	99420	100130															0.366128	0.461739	0.477506	0.466704
"	C15	100080	147690	165180	165290	67263	82049	85569	88076															0.359205	0.432505	0.456097	0.459458
"	C16	115700	163800	183530	184820	61689	78795	81140	84990															0.327908	0.444451	0.481965	0.467143
"	C17	131830	170370	192630	200260	59385	78262	79139	82700															0.466819	0.518956	0.557892	0.540147
"	C18	114040	158090	177210	180470	63614	79488	84894	89112															0.549533	0.540635	0.589166	0.587037
"	C19	109750	154680	176040	180870	74480	91633	97431	99038															0.442178	0.497198	0.520941	0.506223
"	C20	125260	168530	186870	190400	72897	88969	94391	95727															0.321367	0.407596	0.446541	0.452435
"	C21	103780	146250	162860	168470	71102	86198	91510	92468															0.418034	0.472088	0.494884	0.497232
"	C22	80214	122300	143640	144240	72304	84696	88935	89855															0.314878	0.410612	0.438106	0.451131
"	N3	103980	144510	154480	161620	52636	66663	69737	65469															0.0986112	0.307473	0.380848	0.377045
"	N4	104340	143180	156970	158970	63630	74679	80920	80227															0.493787	0.538696	0.548569	0.59492
"	N5	115180	156560	169160	174080	64940	77979	83009	82369															0.390167	0.478426	0.484487	0.495332
"	N6	107280	143560	155270	159790	61960	74056	79724	81110															0.436187	0.501923	0.509287	0.526832
"	N7	115190	148090	156260	160760	75414	82729	88780	88208															0.422446	0.484146	0.486546	0.492396
"	N8	117030	152230	166060	172350	61512	69068	74211	74934															0.345308	0.44136	0.431844	0.451306
"	N9	102430	139660	151000	156000	51458	59089	63686	66983															0.474391	0.546292	0.553107	0.565222
"	N10	97474	131320	143390	149280	58538	67171	71061	72762															0.497628	0.576908	0.578238	0.570622
"	N11	97883	136000	146960	148730	62180	69350	74270	77449															0.39945	0.488494	0.504422	0.51258
"	N12	94793	130040	145300	152920	54819	62842	68902	70930															0.364752	0.490074	0.494624	0.479264
"	N13	90110	129090	145280	149970	47190	58164	61157	62665															0.421698	0.516749	0.525795	0.536163
"	N14	87822	125910	138390	142010	45023	54200	57389	59816															0.476307	0.549431	0.57904	0.58215
"	N15	85265	118320	132480	137830	47507	54880	59018	60565															0.487338	0.569534	0.58531	0.57879
"	N16	86176	121930	137620	142820	45829	55467	59459	62692															0.442831	0.536173	0.554514	0.560582
"	N17	101930	133740	148580	153700	54970	60705	66159	67917															0.468193	0.545091	0.567948	0.561042
"	N18	87972	120320	135730	141810	57727	64403	71673	72715															0.460708	0.546097	0.554725	0.55812
"	N19	91141	123480	138200	145140	61211	66994	73918	75368															0.343803	0.464736	0.471944	0.487236
"	N20	91249	123490	140150	147790	52806	62031	67682	69747															0.328392	0.457451	0.465137	0.480722
"	N21	83011	113790	126480	130400	57482	62533	69077	72625															0.421298	0.497684	0.517075	0.528067
"	N22	73762	99500	113730	117660	44672	50611	52148	53001															0.307538	0.450453	0.45385	0.44306
																								0.394377	0.491347	0.541475	0.549541
	Mean controls	111597	153552	168388	167945	65828.5	77264.9	82116.7	83706.8
																						STDEV (177Lu-lilotomab alone):		0.0778575	0.0560868	0.0510848	0.0520481
	Mean effect of Betalutin alone (F̅b)=1-(〖averageRLU〗_(177Lu-lilotomab)/〖averageRLU〗_control )					0.410121	0.496816	0.512336	0.501581													2xSTDEV (177Lu-lilotomab alone)		0.155715	0.112174	0.10217	0.104096
